# Supplementary material for: Expression Profile and Regulatory Properties of m6A-Modified circRNAs in the Longissimus Dorsi of Queshan Black and Large White Pigs
Source: MDPI journal article supplement (doi:10.3390/ani13132190), 2023-07-04
Supplement: s1 [file s1]

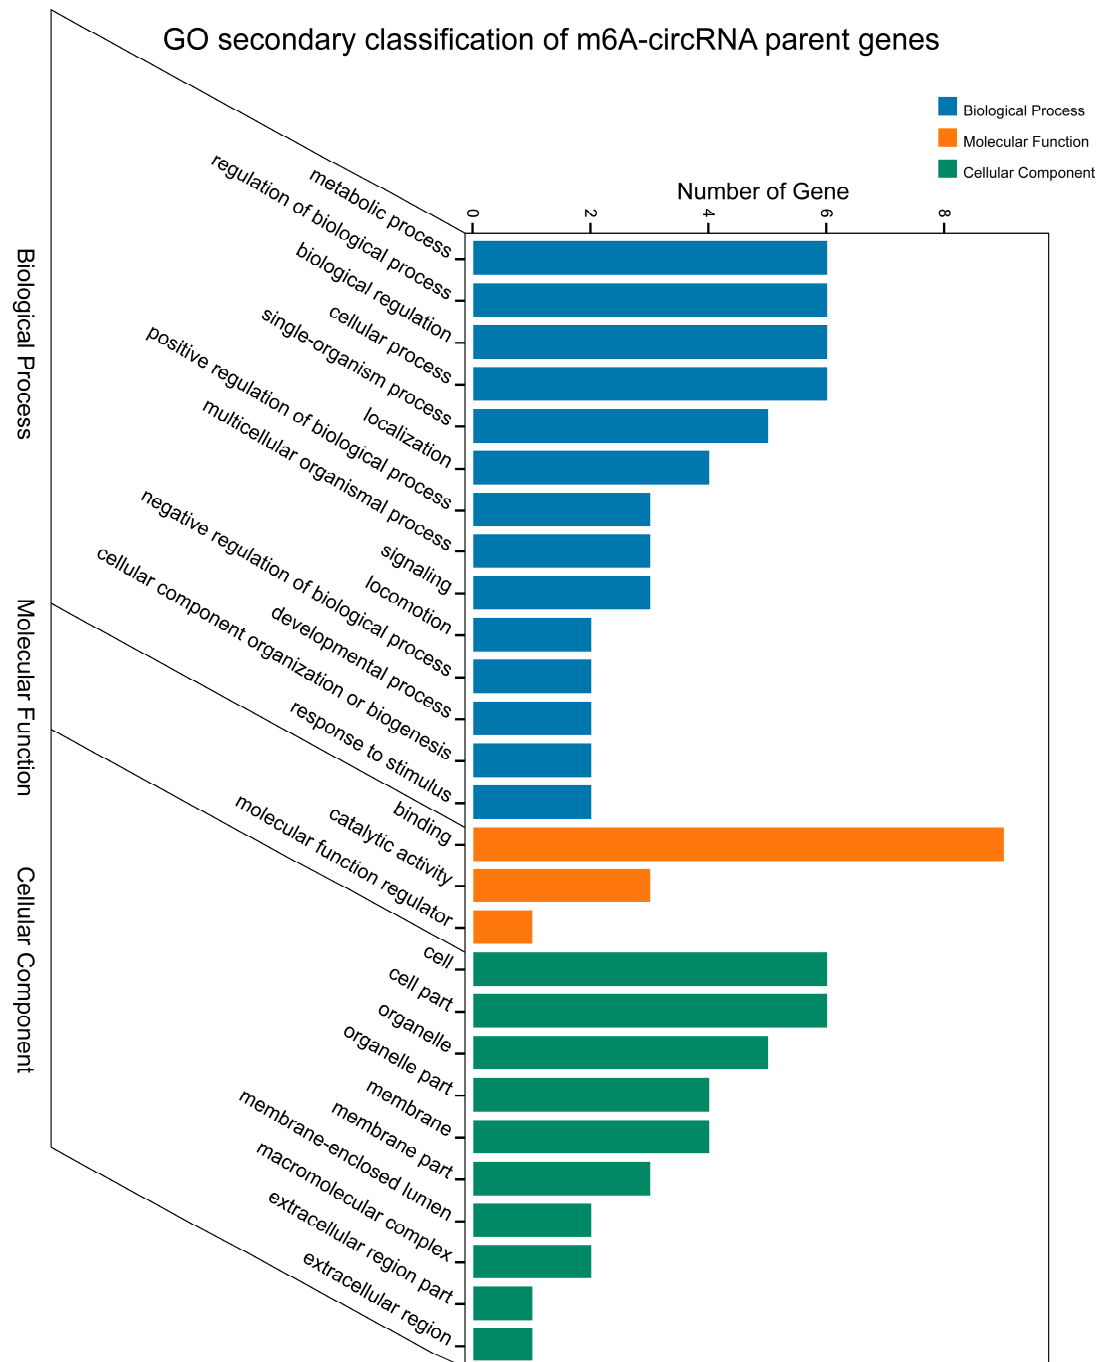

**Figure S1.** GO secondary classification of m6A-circRNA parent genes.

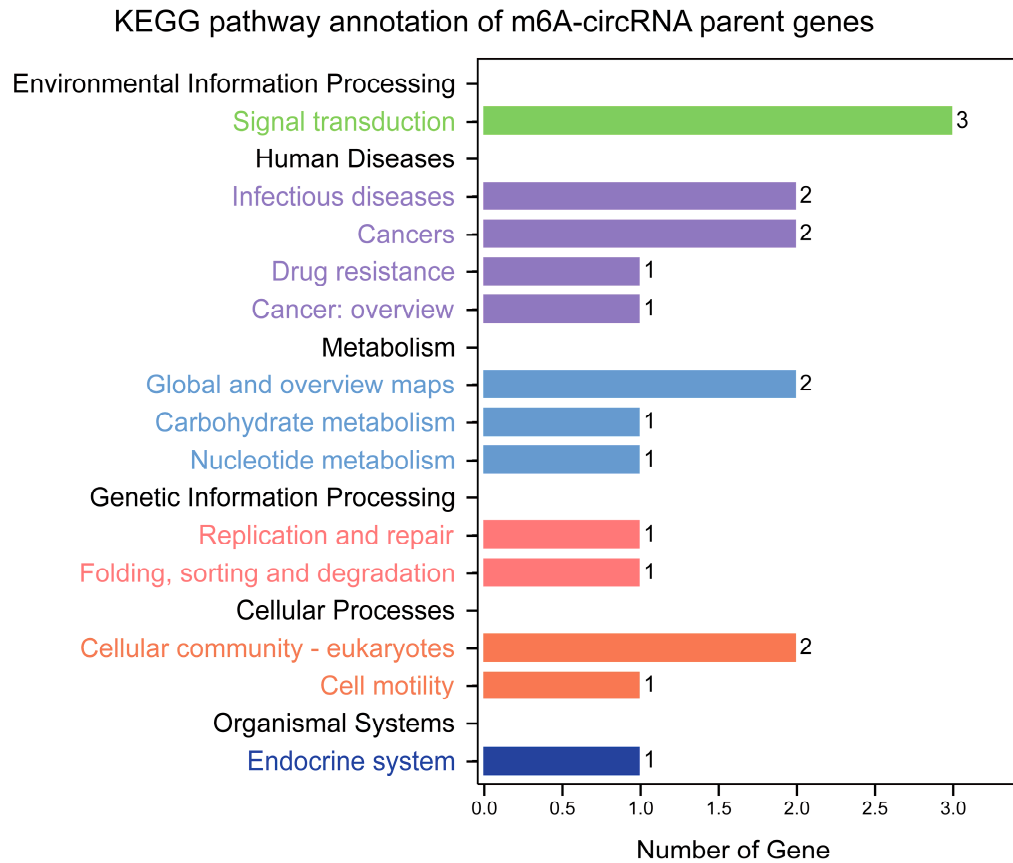

**Figure S2.** KEGG pathway annotation of m6A-circRNA parent genes.

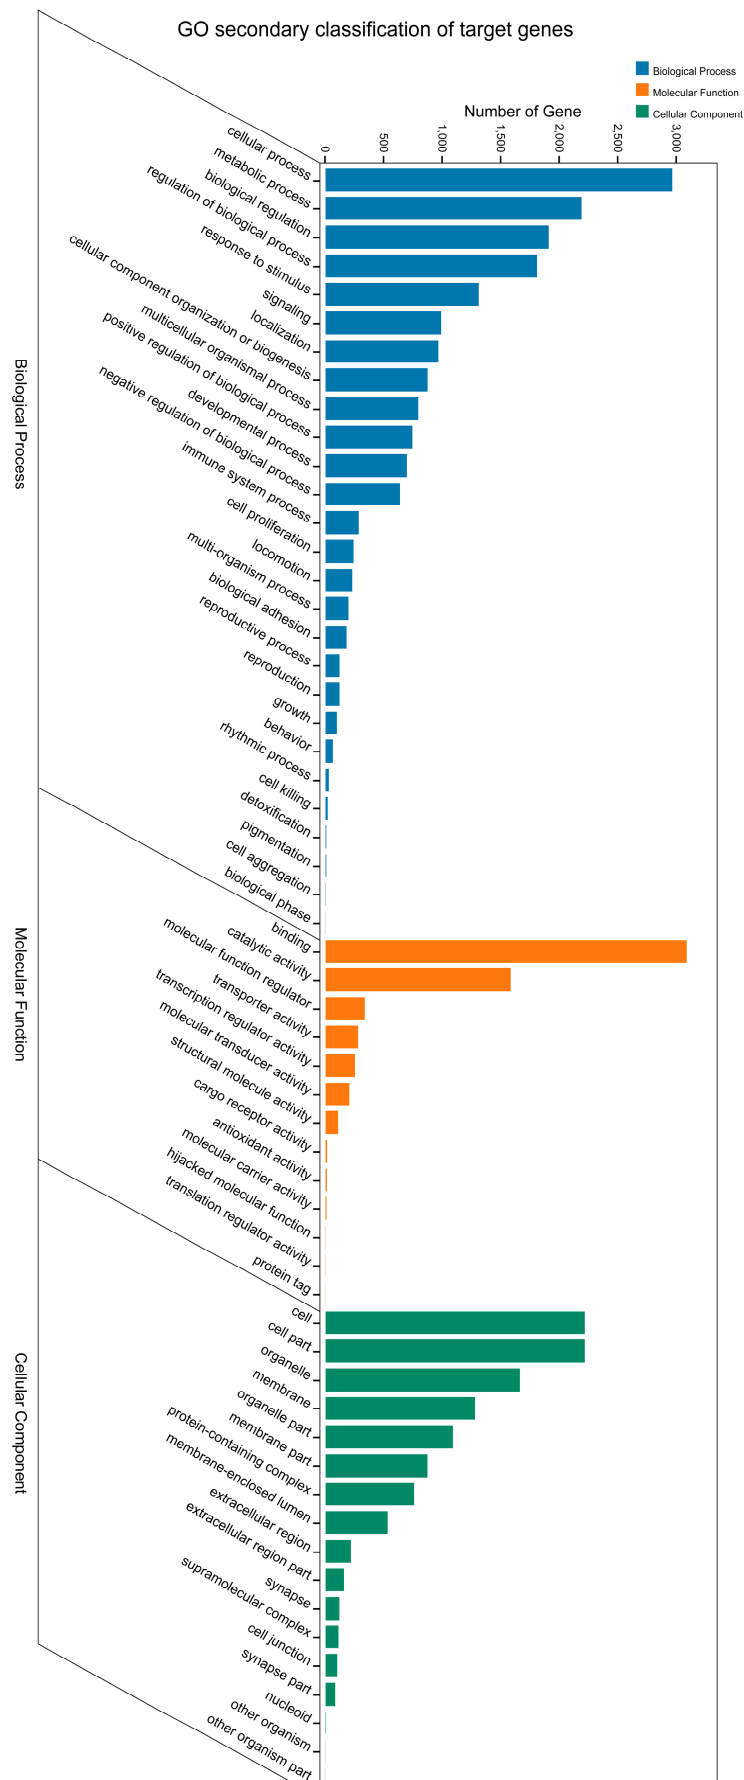

Figure S3. GO secondary classification of target genes.

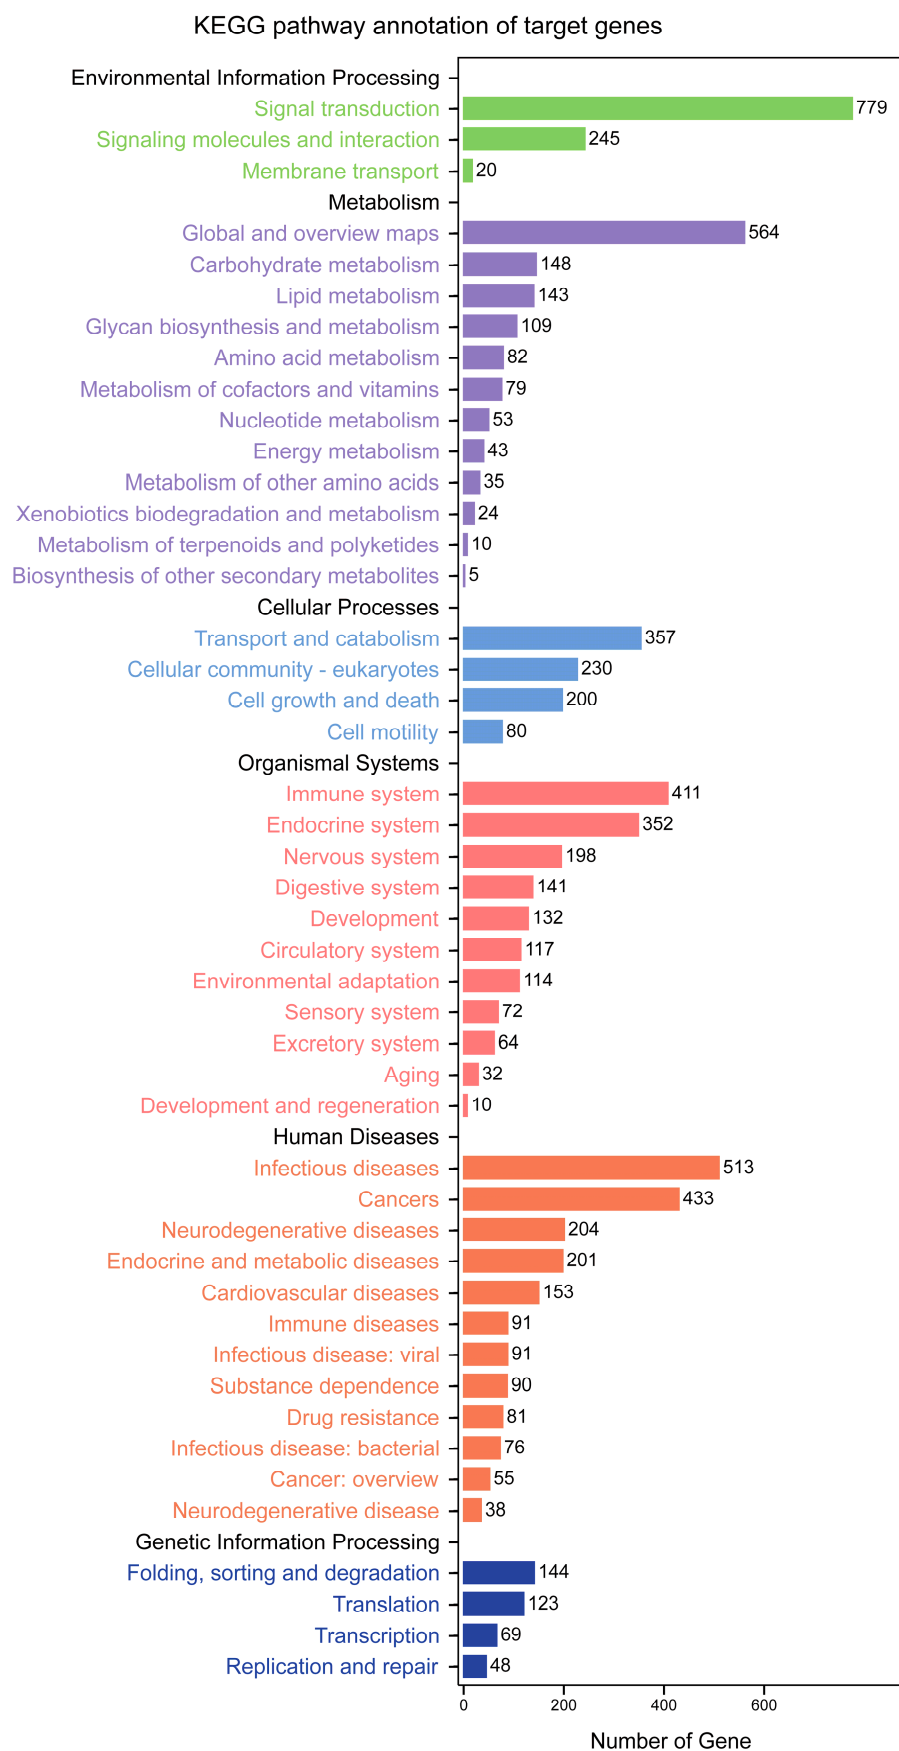

**Figure S4.** KEGG pathway annotation of target genes.
