# Supplementary material for: Expression Profile and Regulatory Properties of m6A-Modified circRNAs in the Longissimus Dorsi of Queshan Black and Large White Pigs
Source: Animals (Basel). 2023 Jul 4;13(13):2190. doi: 10.3390/ani13132190 (PMC10339870; doi:10.3390/ani13132190)
Supplement: Supplementary file 1 [file animals-13-02190-s001.zip]

Archive with 9 entries (9 files):
- Supplementary Files/animals-2387305-supplementary.pdf
- Supplementary Files/Table S1. List of m6A-circCAMLG related ceRNA regulatory networks.xlsx
- Supplementary Files/Table S2. List of m6A-circCTIF related ceRNA regulatory networks.xlsx
- Supplementary Files/Table S3. List of m6A-circEGF related ceRNA regulatory networks.xlsx
- Supplementary Files/Table S4. List of m6A-circGUCY2C related ceRNA regulatory networks.xlsx
- Supplementary Files/Table S5. List of m6A-circKIAA0513 related ceRNA regulatory networks.xlsx
- Supplementary Files/Table S6. List of m6A-circPATJ related ceRNA regulatory networks.xlsx
- Supplementary Files/Table S7. List of m6A-circRNASEH1 related ceRNA regulatory networks.xlsx
- Supplementary Files/Table S8. List of m6A-circSETBP1 related ceRNA regulatory networks.xlsx
