# Supplementary material for: Expression Profile and Regulatory Properties of m6A-Modified circRNAs in the Longissimus Dorsi of Queshan Black and Large White Pigs
Source: Animals (Basel). 2023 Jul 4;13(13):2190. doi: 10.3390/ani13132190 (PMC10339870; doi:10.3390/ani13132190)
Supplement: Supplementary file 1 [file animals-13-02190-s001.zip › Supplementary Files/Table S1. List of m6A-circCAMLG related ceRNA regulatory networks.xlsx]

## Sheet: Sheet1
m6A-circRNA name	miRNA	gene name
m6A-circCAMLG	miR-301	-
m6A-circCAMLG	miR-9856-3p	-
m6A-circCAMLG	miR-450c-3p	-
m6A-circCAMLG	miR-31	ENSSSCG00000004001
m6A-circCAMLG	miR-31	NUP188
m6A-circCAMLG	miR-31	FATE1
m6A-circCAMLG	miR-31	KLK6
m6A-circCAMLG	miR-31	ALG5
m6A-circCAMLG	miR-31	VEGFA
m6A-circCAMLG	miR-31	ENSSSCG00000013665
m6A-circCAMLG	miR-31	TMED1
m6A-circCAMLG	miR-31	GGA3
m6A-circCAMLG	miR-31	NR5A2
m6A-circCAMLG	miR-31	ALDOC
m6A-circCAMLG	miR-31	DRD2
m6A-circCAMLG	miR-31	FANCD2
m6A-circCAMLG	miR-31	TTC7B
m6A-circCAMLG	miR-31	STRADA
m6A-circCAMLG	miR-31	CPE
m6A-circCAMLG	miR-31	RP9
m6A-circCAMLG	miR-31	RARG
m6A-circCAMLG	miR-31	KLC4
m6A-circCAMLG	miR-31	TMEM179B
m6A-circCAMLG	miR-31	VWA7
m6A-circCAMLG	miR-31	ENSSSCG00000034866
m6A-circCAMLG	miR-31	CTNNBIP1
m6A-circCAMLG	miR-31	CNP
m6A-circCAMLG	miR-31	GPR137
m6A-circCAMLG	miR-31	ENSSSCG00000015814
m6A-circCAMLG	miR-31	ASXL1
m6A-circCAMLG	miR-31	SAE1
m6A-circCAMLG	miR-31	PDGFB
m6A-circCAMLG	miR-31	TTLL9
m6A-circCAMLG	miR-31	ZNF655
m6A-circCAMLG	miR-31	VAPB
m6A-circCAMLG	miR-31	AP3B1
m6A-circCAMLG	miR-31	DHRS1
m6A-circCAMLG	miR-31	ETV7
m6A-circCAMLG	miR-31	DENND5A
m6A-circCAMLG	miR-31	KANK1
m6A-circCAMLG	miR-31	FAM3A
m6A-circCAMLG	miR-31	UBAP2L
m6A-circCAMLG	miR-31	ELAVL1
m6A-circCAMLG	miR-31	SOX8
m6A-circCAMLG	miR-31	SEPTIN5
m6A-circCAMLG	miR-31	YTHDF1
m6A-circCAMLG	miR-31	IST1
m6A-circCAMLG	miR-31	BET1L
m6A-circCAMLG	miR-31	CCDC9
m6A-circCAMLG	miR-31	SCN1B
m6A-circCAMLG	miR-31	MIF4GD
m6A-circCAMLG	miR-31	TTC4
m6A-circCAMLG	miR-31	CCDC47
m6A-circCAMLG	miR-31	EFNA4
m6A-circCAMLG	miR-31	DKC1
m6A-circCAMLG	miR-31	CACNA2D2
m6A-circCAMLG	miR-31	FOXP3
m6A-circCAMLG	miR-31	SEMA4D
m6A-circCAMLG	miR-31	VBP1
m6A-circCAMLG	miR-31	VWF
m6A-circCAMLG	miR-31	SQSTM1
m6A-circCAMLG	miR-31	CPZ
m6A-circCAMLG	miR-31	GKN3
m6A-circCAMLG	miR-31	ENSSSCG00000032591
m6A-circCAMLG	miR-31	RNASEK
m6A-circCAMLG	miR-31	ALKBH4
m6A-circCAMLG	miR-31	ENSSSCG00000025500
m6A-circCAMLG	miR-31	ENSSSCG00000029596
m6A-circCAMLG	miR-31	FMNL3
m6A-circCAMLG	miR-31	FSHR
m6A-circCAMLG	miR-31	FMNL1
m6A-circCAMLG	miR-31	FHIP1A
m6A-circCAMLG	miR-31	ENSSSCG00000028341
m6A-circCAMLG	miR-31	SLC12A9
m6A-circCAMLG	miR-31	MON1A
m6A-circCAMLG	miR-31	HGH1
m6A-circCAMLG	miR-31	GGA1
m6A-circCAMLG	miR-31	ZGPAT
m6A-circCAMLG	miR-31	PSD2
m6A-circCAMLG	miR-31	FNDC4
m6A-circCAMLG	miR-31	CUL4A
m6A-circCAMLG	miR-31	KLHL22
m6A-circCAMLG	miR-31	DCLRE1A
m6A-circCAMLG	miR-31	P4HTM
m6A-circCAMLG	miR-31	TATDN2
m6A-circCAMLG	miR-31	APP
m6A-circCAMLG	miR-31	ENSSSCG00000012842
m6A-circCAMLG	miR-31	ENSSSCG00000013530
m6A-circCAMLG	miR-31	XAB2
m6A-circCAMLG	miR-31	ENSSSCG00000013607
m6A-circCAMLG	miR-31	COL5A3
m6A-circCAMLG	miR-31	PTGER1
m6A-circCAMLG	miR-31	LMAN2
m6A-circCAMLG	miR-31	CHRDL2
m6A-circCAMLG	miR-31	ELAPOR2
m6A-circCAMLG	miR-31	TOR3A
m6A-circCAMLG	miR-31	PTPN3
m6A-circCAMLG	miR-31	CSNK1E
m6A-circCAMLG	miR-31	SLA-DQB1
m6A-circCAMLG	miR-31	XRCC3
m6A-circCAMLG	miR-31	TESK2
m6A-circCAMLG	miR-31	SMPDL3A
m6A-circCAMLG	miR-31	SMPD2
m6A-circCAMLG	miR-31	FAM135B
m6A-circCAMLG	miR-31	KHDRBS3
m6A-circCAMLG	miR-31	PEX2
m6A-circCAMLG	miR-31	CPXM1
m6A-circCAMLG	miR-326	SBF1
m6A-circCAMLG	miR-326	TREM2
m6A-circCAMLG	miR-326	CFAP46
m6A-circCAMLG	miR-326	SLC39A13
m6A-circCAMLG	miR-326	HES4
m6A-circCAMLG	miR-326	MED22
m6A-circCAMLG	miR-326	ENSSSCG00000033858
m6A-circCAMLG	miR-326	GPC1
m6A-circCAMLG	miR-326	CAMK2B
m6A-circCAMLG	miR-326	ENSSSCG00000061550
m6A-circCAMLG	miR-326	AASDHPPT
m6A-circCAMLG	miR-326	RNF44
m6A-circCAMLG	miR-326	ENSSSCG00000033286
m6A-circCAMLG	miR-326	SLC22A23
m6A-circCAMLG	miR-326	SPECC1
m6A-circCAMLG	miR-326	ACER2
m6A-circCAMLG	miR-326	KIF21B
m6A-circCAMLG	miR-326	OPN4
m6A-circCAMLG	miR-326	DNAJC17
m6A-circCAMLG	miR-326	MAPK3
m6A-circCAMLG	miR-326	THRA
m6A-circCAMLG	miR-326	FAM104A
m6A-circCAMLG	miR-326	KIF26A
m6A-circCAMLG	miR-326	GMFG
m6A-circCAMLG	miR-326	MINK1
m6A-circCAMLG	miR-326	WDR18
m6A-circCAMLG	miR-326	CTSW
m6A-circCAMLG	miR-326	GNMT
m6A-circCAMLG	miR-326	ZER1
m6A-circCAMLG	miR-326	SMCO1
m6A-circCAMLG	miR-326	DPF3
m6A-circCAMLG	miR-326	CC2D1A
m6A-circCAMLG	miR-326	FBXL12
m6A-circCAMLG	miR-326	SNAPC4
m6A-circCAMLG	miR-326	NONO
m6A-circCAMLG	miR-326	ARNT2
m6A-circCAMLG	miR-326	ASPG
m6A-circCAMLG	miR-326	INPP5E
m6A-circCAMLG	miR-326	KIDINS220
m6A-circCAMLG	miR-326	TUBG2
m6A-circCAMLG	miR-326	RUFY3
m6A-circCAMLG	miR-326	CRAT
m6A-circCAMLG	miR-326	ATP2B4
m6A-circCAMLG	miR-326	ENSSSCG00000040556
m6A-circCAMLG	miR-326	PRPF18
m6A-circCAMLG	miR-326	DUSP29
m6A-circCAMLG	miR-326	TIPRL
m6A-circCAMLG	miR-326	ARRDC1
m6A-circCAMLG	miR-326	TFDP2
m6A-circCAMLG	miR-326	FLNC
m6A-circCAMLG	miR-326	ABLIM3
m6A-circCAMLG	miR-326	GRINA
m6A-circCAMLG	miR-326	PFKFB4
m6A-circCAMLG	miR-326	DAPK2
m6A-circCAMLG	miR-326	RARG
m6A-circCAMLG	miR-326	ACTR1A
m6A-circCAMLG	miR-326	BICDL1
m6A-circCAMLG	miR-326	NT5C2
m6A-circCAMLG	miR-326	MEX3B
m6A-circCAMLG	miR-326	CLDN19
m6A-circCAMLG	miR-326	EDN1
m6A-circCAMLG	miR-326	PKM
m6A-circCAMLG	miR-326	CAMKV
m6A-circCAMLG	miR-326	MORC2
m6A-circCAMLG	miR-326	TMEM59L
m6A-circCAMLG	miR-326	GRIK4
m6A-circCAMLG	miR-326	PHF21A
m6A-circCAMLG	miR-326	GRIP2
m6A-circCAMLG	miR-326	RELT
m6A-circCAMLG	miR-326	ARFGAP1
m6A-circCAMLG	miR-326	CENPM
m6A-circCAMLG	miR-326	NFYC
m6A-circCAMLG	miR-326	ENSSSCG00000038719
m6A-circCAMLG	miR-326	RFNG
m6A-circCAMLG	miR-326	CAPN10
m6A-circCAMLG	miR-326	ELOVL7
m6A-circCAMLG	miR-326	KLHL12
m6A-circCAMLG	miR-326	CACFD1
m6A-circCAMLG	miR-326	ATXN7L1
m6A-circCAMLG	miR-326	TNC
m6A-circCAMLG	miR-326	PPP1R12B
m6A-circCAMLG	miR-326	TSEN54
m6A-circCAMLG	miR-326	HSF1
m6A-circCAMLG	miR-326	ADD1
m6A-circCAMLG	miR-326	CXCR5
m6A-circCAMLG	miR-326	ST3GAL3
m6A-circCAMLG	miR-326	ENSSSCG00000031083
m6A-circCAMLG	miR-326	TRIM11
m6A-circCAMLG	miR-326	C12orf43
m6A-circCAMLG	miR-326	MAD1L1
m6A-circCAMLG	miR-326	TMC6
m6A-circCAMLG	miR-326	SLC39A1
m6A-circCAMLG	miR-326	FAM131C
m6A-circCAMLG	miR-326	SNX32
m6A-circCAMLG	miR-326	DRG2
m6A-circCAMLG	miR-326	ENSSSCG00000039972
m6A-circCAMLG	miR-326	CHFR
m6A-circCAMLG	miR-326	PCP2
m6A-circCAMLG	miR-326	CBX8
m6A-circCAMLG	miR-326	CAVIN1
m6A-circCAMLG	miR-326	DENND1B
m6A-circCAMLG	miR-326	FBXO6
m6A-circCAMLG	miR-326	B4GALNT1
m6A-circCAMLG	miR-326	REXO1
m6A-circCAMLG	miR-326	KDELR2
m6A-circCAMLG	miR-326	TNNT3
m6A-circCAMLG	miR-326	FRMD4A
m6A-circCAMLG	miR-326	CACNB1
m6A-circCAMLG	miR-326	MYADML2
m6A-circCAMLG	miR-326	C3orf18
m6A-circCAMLG	miR-326	ITPK1
m6A-circCAMLG	miR-326	SYT2
m6A-circCAMLG	miR-326	RIMS3
m6A-circCAMLG	miR-326	TMEM223
m6A-circCAMLG	miR-326	ENSSSCG00000010359
m6A-circCAMLG	miR-326	HLX
m6A-circCAMLG	miR-326	TNK2
m6A-circCAMLG	miR-326	TMEM8B
m6A-circCAMLG	miR-326	TRPV2
m6A-circCAMLG	miR-326	ILK
m6A-circCAMLG	miR-326	THAP7
m6A-circCAMLG	miR-326	DLX1
m6A-circCAMLG	miR-326	GRN
m6A-circCAMLG	miR-326	USP19
m6A-circCAMLG	miR-326	EML2
m6A-circCAMLG	miR-326	IFT122
m6A-circCAMLG	miR-326	ENSSSCG00000035224
m6A-circCAMLG	miR-326	SYK
m6A-circCAMLG	miR-326	TEDC1
m6A-circCAMLG	miR-326	INPP5D
m6A-circCAMLG	miR-326	GAB2
m6A-circCAMLG	miR-326	LRRC75A
m6A-circCAMLG	miR-326	CCDC69
m6A-circCAMLG	miR-326	DPF1
m6A-circCAMLG	miR-326	EPS8L2
m6A-circCAMLG	miR-326	TTC39A
m6A-circCAMLG	miR-326	NFIC
m6A-circCAMLG	miR-326	PTH1R
m6A-circCAMLG	miR-326	BAX
m6A-circCAMLG	miR-326	SH3BP4
m6A-circCAMLG	miR-326	ENTR1
m6A-circCAMLG	miR-326	ACTN4
m6A-circCAMLG	miR-326	GRIPAP1
m6A-circCAMLG	miR-326	CLIC5
m6A-circCAMLG	miR-326	IRGQ
m6A-circCAMLG	miR-326	CCDC85C
m6A-circCAMLG	miR-326	PIP5K1C
m6A-circCAMLG	miR-326	AGFG2
m6A-circCAMLG	miR-326	NCSTN
m6A-circCAMLG	miR-326	KCNJ6
m6A-circCAMLG	miR-326	ENSSSCG00000034286
m6A-circCAMLG	miR-326	TUBB2A
m6A-circCAMLG	miR-326	THBS2
m6A-circCAMLG	miR-326	ARHGEF2
m6A-circCAMLG	miR-326	SLC44A2
m6A-circCAMLG	miR-326	TTC38
m6A-circCAMLG	miR-326	NUP98
m6A-circCAMLG	miR-326	EMP2
m6A-circCAMLG	miR-326	TLL2
m6A-circCAMLG	miR-326	PRKACA
m6A-circCAMLG	miR-326	ADRM1
m6A-circCAMLG	miR-326	SLC28A1
m6A-circCAMLG	miR-326	MAPKAPK3
m6A-circCAMLG	miR-326	ULK3
m6A-circCAMLG	miR-326	DNAJC18
m6A-circCAMLG	miR-326	CIC
m6A-circCAMLG	miR-326	DPYSL2
m6A-circCAMLG	miR-326	CTIF
m6A-circCAMLG	miR-326	EXTL3
m6A-circCAMLG	miR-326	COPG2
m6A-circCAMLG	miR-326	FAM216B
m6A-circCAMLG	miR-326	MYORG
m6A-circCAMLG	miR-326	TRAF3
m6A-circCAMLG	miR-326	STAT5A
m6A-circCAMLG	miR-326	ENSSSCG00000053901
m6A-circCAMLG	miR-326	TXLNB
m6A-circCAMLG	miR-326	ST3GAL4
m6A-circCAMLG	miR-326	ENSSSCG00000027916
m6A-circCAMLG	miR-326	PICK1
m6A-circCAMLG	miR-326	ANXA9
m6A-circCAMLG	miR-326	ENSSSCG00000033594
m6A-circCAMLG	miR-326	SORCS2
m6A-circCAMLG	miR-326	DIS3L2
m6A-circCAMLG	miR-326	DNAAF3
m6A-circCAMLG	miR-326	GPR37L1
m6A-circCAMLG	miR-326	PLCH2
m6A-circCAMLG	miR-326	MEGF6
m6A-circCAMLG	miR-326	ARPC1B
m6A-circCAMLG	miR-326	DRD2
m6A-circCAMLG	miR-326	ENSSSCG00000033623
m6A-circCAMLG	miR-326	YKT6
m6A-circCAMLG	miR-326	P3H1
m6A-circCAMLG	miR-326	TDRD10
m6A-circCAMLG	miR-326	ISY1
m6A-circCAMLG	miR-326	CCT7
m6A-circCAMLG	miR-326	PCMTD2
m6A-circCAMLG	miR-326	AGPAT3
m6A-circCAMLG	miR-326	KLF12
m6A-circCAMLG	miR-326	SLC25A34
m6A-circCAMLG	miR-326	TMEM11
m6A-circCAMLG	miR-326	CLIC3
m6A-circCAMLG	miR-326	STMN4
m6A-circCAMLG	miR-326	PTPRH
m6A-circCAMLG	miR-326	HID1
m6A-circCAMLG	miR-326	PRPF6
m6A-circCAMLG	miR-326	ELOVL1
m6A-circCAMLG	miR-326	DTYMK
m6A-circCAMLG	miR-326	LTBR
m6A-circCAMLG	miR-326	OBSL1
m6A-circCAMLG	miR-326	AP3S2
m6A-circCAMLG	miR-326	KDM4C
m6A-circCAMLG	miR-326	GPR107
m6A-circCAMLG	miR-326	EPN2
m6A-circCAMLG	miR-326	UQCRC1
m6A-circCAMLG	miR-326	USHBP1
m6A-circCAMLG	miR-326	HGS
m6A-circCAMLG	miR-326	ENSSSCG00000039915
m6A-circCAMLG	miR-326	DTX4
m6A-circCAMLG	miR-326	SLC16A5
m6A-circCAMLG	miR-326	PLLP
m6A-circCAMLG	miR-326	TJP3
m6A-circCAMLG	miR-326	HRH3
m6A-circCAMLG	miR-326	SPEF1
m6A-circCAMLG	miR-326	KCTD21
m6A-circCAMLG	miR-326	ATG16L1
m6A-circCAMLG	miR-326	ENSSSCG00000052916
m6A-circCAMLG	miR-326	TMEM175
m6A-circCAMLG	miR-326	FLNA
m6A-circCAMLG	miR-326	RASGRP2
m6A-circCAMLG	miR-326	SLC2A4RG
m6A-circCAMLG	miR-326	TK2
m6A-circCAMLG	miR-326	AIMP2
m6A-circCAMLG	miR-326	NISCH
m6A-circCAMLG	miR-326	TBC1D7
m6A-circCAMLG	miR-326	BRF1
m6A-circCAMLG	miR-326	PTPN5
m6A-circCAMLG	miR-326	GPR35
m6A-circCAMLG	miR-326	FBLIM1
m6A-circCAMLG	miR-326	VASH1
m6A-circCAMLG	miR-326	GDPD5
m6A-circCAMLG	miR-326	KRT71
m6A-circCAMLG	miR-326	CA5A
m6A-circCAMLG	miR-326	PQBP1
m6A-circCAMLG	miR-326	RPN1
m6A-circCAMLG	miR-326	RIPOR1
m6A-circCAMLG	miR-326	POLDIP3
m6A-circCAMLG	miR-326	ENSSSCG00000040885
m6A-circCAMLG	miR-326	TMEM177
m6A-circCAMLG	miR-326	FSTL3
m6A-circCAMLG	miR-326	ENSSSCG00000035293
m6A-circCAMLG	miR-326	SLC8A2
m6A-circCAMLG	miR-326	NCKAP1L
m6A-circCAMLG	miR-326	GPT2
m6A-circCAMLG	miR-326	CSNK1E
m6A-circCAMLG	miR-326	SLC6A11
m6A-circCAMLG	miR-326	KATNIP
m6A-circCAMLG	miR-326	ADGRG5
m6A-circCAMLG	miR-326	ZBTB45
m6A-circCAMLG	miR-326	PPIL2
m6A-circCAMLG	miR-326	DLGAP4
m6A-circCAMLG	miR-326	TIFAB
m6A-circCAMLG	miR-326	NUCB1
m6A-circCAMLG	miR-326	RIPOR2
m6A-circCAMLG	miR-326	ZBED1
m6A-circCAMLG	miR-326	TBC1D13
m6A-circCAMLG	miR-326	CDHR5
m6A-circCAMLG	miR-326	RBM22
m6A-circCAMLG	miR-326	ENSSSCG00000027890
m6A-circCAMLG	miR-326	ENSSSCG00000016284
m6A-circCAMLG	miR-326	NAP1L4
m6A-circCAMLG	miR-326	DBF4B
m6A-circCAMLG	miR-326	ENSSSCG00000040498
m6A-circCAMLG	miR-326	RANBP1
m6A-circCAMLG	miR-326	MTSS2
m6A-circCAMLG	miR-326	TPM2
m6A-circCAMLG	miR-326	ZNF335
m6A-circCAMLG	miR-326	ELMO2
m6A-circCAMLG	miR-326	SCARA3
m6A-circCAMLG	miR-326	SMARCB1
m6A-circCAMLG	miR-326	NR1D1
m6A-circCAMLG	miR-326	TSPAN32
m6A-circCAMLG	miR-326	NCAPG2
m6A-circCAMLG	miR-326	C1QTNF1
m6A-circCAMLG	miR-326	CFAP276
m6A-circCAMLG	miR-326	DYNC1H1
m6A-circCAMLG	miR-326	SLC17A5
m6A-circCAMLG	miR-326	KLF11
m6A-circCAMLG	miR-326	ANO9
m6A-circCAMLG	miR-326	DNAJC8
m6A-circCAMLG	miR-326	KRT7
m6A-circCAMLG	miR-326	NKX3-1
m6A-circCAMLG	miR-326	NUB1
m6A-circCAMLG	miR-326	TUBA4A
m6A-circCAMLG	miR-326	GOSR2
m6A-circCAMLG	miR-326	SPATA2
m6A-circCAMLG	miR-326	RASL10B
m6A-circCAMLG	miR-326	KCNQ1
m6A-circCAMLG	miR-326	MSRB3
m6A-circCAMLG	miR-326	STRADA
m6A-circCAMLG	miR-326	FAM168A
m6A-circCAMLG	miR-326	ENSSSCG00000052117
m6A-circCAMLG	miR-326	GLB1L2
m6A-circCAMLG	miR-326	VPS36
m6A-circCAMLG	miR-326	COL6A3
m6A-circCAMLG	miR-326	EVL
m6A-circCAMLG	miR-326	LSP1
m6A-circCAMLG	miR-326	ASMTL
m6A-circCAMLG	miR-326	HNRNPA2B1
m6A-circCAMLG	miR-326	COLCA2
m6A-circCAMLG	miR-326	PAX5
m6A-circCAMLG	miR-326	BABAM2
m6A-circCAMLG	miR-326	VIPR2
m6A-circCAMLG	miR-326	KLF2
m6A-circCAMLG	miR-326	CTNNBIP1
m6A-circCAMLG	miR-326	GPIHBP1
m6A-circCAMLG	miR-326	RALY
m6A-circCAMLG	miR-326	PPP1R7
m6A-circCAMLG	miR-326	TM4SF1
m6A-circCAMLG	miR-326	BCAR1
m6A-circCAMLG	miR-326	ENSSSCG00000027232
m6A-circCAMLG	miR-326	TEAD2
m6A-circCAMLG	miR-326	C6orf89
m6A-circCAMLG	miR-326	DIP2A
m6A-circCAMLG	miR-326	ITIH3
m6A-circCAMLG	miR-326	ARRB1
m6A-circCAMLG	miR-326	RAB11FIP3
m6A-circCAMLG	miR-326	SLC25A40
m6A-circCAMLG	miR-326	CCDC134
m6A-circCAMLG	miR-326	TMEM52
m6A-circCAMLG	miR-326	NUAK1
m6A-circCAMLG	miR-326	NIBAN2
m6A-circCAMLG	miR-326	EPS15L1
m6A-circCAMLG	miR-326	GBGT1
m6A-circCAMLG	miR-326	SEMA7A
m6A-circCAMLG	miR-326	CACNB3
m6A-circCAMLG	miR-326	CLTA
m6A-circCAMLG	miR-326	TTC31
m6A-circCAMLG	miR-326	HABP2
m6A-circCAMLG	miR-326	EIF4A1
m6A-circCAMLG	miR-326	PDCD1
m6A-circCAMLG	miR-326	SNX27
m6A-circCAMLG	miR-326	MYBBP1A
m6A-circCAMLG	miR-326	FURIN
m6A-circCAMLG	miR-326	IKZF1
m6A-circCAMLG	miR-326	RNF123
m6A-circCAMLG	miR-326	TXNRD2
m6A-circCAMLG	miR-326	SPN
m6A-circCAMLG	miR-326	RELL2
m6A-circCAMLG	miR-326	PRKCSH
m6A-circCAMLG	miR-326	KCNQ2
m6A-circCAMLG	miR-326	CD8A
m6A-circCAMLG	miR-326	KIRREL3
m6A-circCAMLG	miR-326	SCAMP2
m6A-circCAMLG	miR-326	CHD1L
m6A-circCAMLG	miR-326	ACTA1
m6A-circCAMLG	miR-326	AKT1
m6A-circCAMLG	miR-326	MACROH2A1
m6A-circCAMLG	miR-326	DNMT3B
m6A-circCAMLG	miR-326	SLC11A1
m6A-circCAMLG	miR-326	BCL2L1
m6A-circCAMLG	miR-326	MTMR6
m6A-circCAMLG	miR-326	IPO9
m6A-circCAMLG	miR-326	PHB2
m6A-circCAMLG	miR-326	RFXANK
m6A-circCAMLG	miR-326	G6PD
m6A-circCAMLG	miR-326	MTMR3
m6A-circCAMLG	miR-326	NUP188
m6A-circCAMLG	miR-326	ATXN1
m6A-circCAMLG	miR-326	DRGX
m6A-circCAMLG	miR-326	PITPNM3
m6A-circCAMLG	miR-326	CFAP99
m6A-circCAMLG	miR-326	SLC9A7
m6A-circCAMLG	miR-326	ENSSSCG00000033720
m6A-circCAMLG	miR-326	TRPC7
m6A-circCAMLG	miR-326	INHBB
m6A-circCAMLG	miR-326	DGAT1
m6A-circCAMLG	miR-326	NOS1AP
m6A-circCAMLG	miR-326	APOC4
m6A-circCAMLG	miR-326	MCAT
m6A-circCAMLG	miR-326	STK40
m6A-circCAMLG	miR-326	NTF3
m6A-circCAMLG	miR-326	KCNIP2
m6A-circCAMLG	miR-326	MGAT3
m6A-circCAMLG	miR-326	PKP3
m6A-circCAMLG	miR-326	U2AF1L4
m6A-circCAMLG	miR-326	KCNAB2
m6A-circCAMLG	miR-326	TLN2
m6A-circCAMLG	miR-326	TCAF1
m6A-circCAMLG	miR-326	NYNRIN
m6A-circCAMLG	miR-326	MTG2
m6A-circCAMLG	miR-326	PTK2B
m6A-circCAMLG	miR-326	NUMA1
m6A-circCAMLG	miR-326	ENSSSCG00000039656
m6A-circCAMLG	miR-326	DGCR8
m6A-circCAMLG	miR-326	CTNS
m6A-circCAMLG	miR-326	CTSD
m6A-circCAMLG	miR-326	IDUA
m6A-circCAMLG	miR-326	IQCE
m6A-circCAMLG	miR-326	EIF3B
m6A-circCAMLG	miR-326	ABCA3
m6A-circCAMLG	miR-326	DHX30
m6A-circCAMLG	miR-326	WIZ
m6A-circCAMLG	miR-326	CAMK2A
m6A-circCAMLG	miR-326	NLGN3
m6A-circCAMLG	miR-326	SAP25
m6A-circCAMLG	miR-326	UAP1L1
m6A-circCAMLG	miR-326	BPI
m6A-circCAMLG	miR-326	CNPY4
m6A-circCAMLG	miR-326	HCN2
m6A-circCAMLG	miR-326	NDST2
m6A-circCAMLG	miR-326	CCDC24
m6A-circCAMLG	miR-326	LRTM1
m6A-circCAMLG	miR-326	CASKIN2
m6A-circCAMLG	miR-326	TMEM72
m6A-circCAMLG	miR-326	DENND6B
m6A-circCAMLG	miR-326	HYAL3
m6A-circCAMLG	miR-326	THAP3
m6A-circCAMLG	miR-326	WDR81
m6A-circCAMLG	miR-326	EMC10
m6A-circCAMLG	miR-326	CLBA1
m6A-circCAMLG	miR-326	CSK
m6A-circCAMLG	miR-326	SLC2A6
m6A-circCAMLG	miR-326	RGS6
m6A-circCAMLG	miR-326	SF3A2
m6A-circCAMLG	miR-326	NDUFB11
m6A-circCAMLG	miR-326	PGAM5
m6A-circCAMLG	miR-326	GRK3
m6A-circCAMLG	miR-326	NFASC
m6A-circCAMLG	miR-326	AXIN1
m6A-circCAMLG	miR-326	LZTS3
m6A-circCAMLG	miR-326	GPLD1
m6A-circCAMLG	miR-326	INPP5A
m6A-circCAMLG	miR-326	SEPTIN10
m6A-circCAMLG	miR-326	NPLOC4
m6A-circCAMLG	miR-326	ENSSSCG00000031117
m6A-circCAMLG	miR-326	ENSSSCG00000032330
m6A-circCAMLG	miR-326	GIPC1
m6A-circCAMLG	miR-326	GPR137
m6A-circCAMLG	miR-326	SLC48A1
m6A-circCAMLG	miR-326	ATP11A
m6A-circCAMLG	miR-326	ANKS3
m6A-circCAMLG	miR-326	SLC6A9
m6A-circCAMLG	miR-326	SPR
m6A-circCAMLG	miR-326	SHISA5
m6A-circCAMLG	miR-326	ST6GALNAC4
m6A-circCAMLG	miR-326	ERBB3
m6A-circCAMLG	miR-326	USF2
m6A-circCAMLG	miR-326	CCM2
m6A-circCAMLG	miR-326	CADM3
m6A-circCAMLG	miR-326	SOCS3
m6A-circCAMLG	miR-326	EFEMP2
m6A-circCAMLG	miR-326	DOHH
m6A-circCAMLG	miR-326	LRCH4
m6A-circCAMLG	miR-326	TRIM56
m6A-circCAMLG	miR-326	NRAP
m6A-circCAMLG	miR-326	ENSSSCG00000036109
m6A-circCAMLG	miR-326	HLA-DOB
m6A-circCAMLG	miR-326	ANAPC1
m6A-circCAMLG	miR-326	RTEL1
m6A-circCAMLG	miR-326	NRBP1
m6A-circCAMLG	miR-326	ENSSSCG00000000405
m6A-circCAMLG	miR-326	SWSAP1
m6A-circCAMLG	miR-326	ERCC2
m6A-circCAMLG	miR-326	DPP9
m6A-circCAMLG	miR-326	PCDHGA4
m6A-circCAMLG	miR-326	CARHSP1
m6A-circCAMLG	miR-326	SEMA3F
m6A-circCAMLG	miR-326	COPS7B
m6A-circCAMLG	miR-326	NUDCD3
m6A-circCAMLG	miR-326	TRIM29
m6A-circCAMLG	miR-326	ENSSSCG00000032135
m6A-circCAMLG	miR-326	BAIAP2
m6A-circCAMLG	miR-326	DNAL4
m6A-circCAMLG	miR-326	KCNC1
m6A-circCAMLG	miR-326	CHRNA4
m6A-circCAMLG	miR-326	CMBL
m6A-circCAMLG	miR-326	CRAMP1
m6A-circCAMLG	miR-326	RASSF1
m6A-circCAMLG	miR-326	B9D1
m6A-circCAMLG	miR-326	ENSSSCG00000037491
m6A-circCAMLG	miR-326	BIN1
m6A-circCAMLG	miR-326	PPFIBP2
m6A-circCAMLG	miR-326	TAF6
m6A-circCAMLG	miR-326	ITPRIPL1
m6A-circCAMLG	miR-326	TLR7
m6A-circCAMLG	miR-326	DAGLA
m6A-circCAMLG	miR-326	ZNF512B
m6A-circCAMLG	miR-326	LIMK1
m6A-circCAMLG	miR-326	GDAP1L1
m6A-circCAMLG	miR-326	RNF130
m6A-circCAMLG	miR-326	PLA2G10
m6A-circCAMLG	miR-326	CACNG2
m6A-circCAMLG	miR-326	TRAPPC10
m6A-circCAMLG	miR-326	RPS6KA1
m6A-circCAMLG	miR-326	IFITM10
m6A-circCAMLG	miR-326	SPECC1L
m6A-circCAMLG	miR-326	MYOZ3
m6A-circCAMLG	miR-326	RNF112
m6A-circCAMLG	miR-326	PHYHD1
m6A-circCAMLG	miR-326	METTL27
m6A-circCAMLG	miR-326	B3GNT7
m6A-circCAMLG	miR-326	UQCC1
m6A-circCAMLG	miR-326	CDKL2
m6A-circCAMLG	miR-326	FCGRT
m6A-circCAMLG	miR-326	MRPL12
m6A-circCAMLG	miR-326	RTN4R
m6A-circCAMLG	miR-326	TUBB2B
m6A-circCAMLG	miR-326	UBE2O
m6A-circCAMLG	miR-326	CXXC1
m6A-circCAMLG	miR-326	ENSSSCG00000038067
m6A-circCAMLG	miR-326	PNPO
m6A-circCAMLG	miR-326	LMAN2L
m6A-circCAMLG	miR-326	SGCA
m6A-circCAMLG	miR-326	GMEB2
m6A-circCAMLG	miR-326	WDR59
m6A-circCAMLG	miR-326	NPDC1
m6A-circCAMLG	miR-326	KHNYN
m6A-circCAMLG	miR-326	PPFIA3
m6A-circCAMLG	miR-326	PPIE
m6A-circCAMLG	miR-326	KCNC3
m6A-circCAMLG	miR-326	SUV39H1
m6A-circCAMLG	miR-326	ISG15
m6A-circCAMLG	miR-326	DOC2A
m6A-circCAMLG	miR-326	AUP1
m6A-circCAMLG	miR-326	CEP104
m6A-circCAMLG	miR-326	HTRA2
m6A-circCAMLG	miR-326	UCKL1
m6A-circCAMLG	miR-326	NDUFS3
m6A-circCAMLG	miR-326	ECE2
m6A-circCAMLG	miR-326	FAM3A
m6A-circCAMLG	miR-326	SRL
m6A-circCAMLG	miR-326	PLPPR3
m6A-circCAMLG	miR-326	TMEM147
m6A-circCAMLG	miR-326	SLC6A6
m6A-circCAMLG	miR-326	DNLZ
m6A-circCAMLG	miR-326	CHCHD3
m6A-circCAMLG	miR-326	RAB1B
m6A-circCAMLG	miR-326	ACER1
m6A-circCAMLG	miR-326	TMEM201
m6A-circCAMLG	miR-326	WNT9B
m6A-circCAMLG	miR-326	HDAC3
m6A-circCAMLG	miR-326	TAS1R3
m6A-circCAMLG	miR-326	CD37
m6A-circCAMLG	miR-326	ITGA11
m6A-circCAMLG	miR-326	ZNF410
m6A-circCAMLG	miR-326	ENSSSCG00000013760
m6A-circCAMLG	miR-326	DNM2
m6A-circCAMLG	miR-326	TBC1D17
m6A-circCAMLG	miR-326	SPOUT1
m6A-circCAMLG	miR-326	STMN3
m6A-circCAMLG	miR-326	HDAC8
m6A-circCAMLG	miR-326	MFGE8
m6A-circCAMLG	miR-326	CLN6
m6A-circCAMLG	miR-326	TALDO1
m6A-circCAMLG	miR-326	TM6SF2
m6A-circCAMLG	miR-326	IKBKG
m6A-circCAMLG	miR-326	DBNL
m6A-circCAMLG	miR-326	ALKBH5
m6A-circCAMLG	miR-326	MAP2K3
m6A-circCAMLG	miR-326	NLRP6
m6A-circCAMLG	miR-326	GPR4
m6A-circCAMLG	miR-326	SNAI2
m6A-circCAMLG	miR-326	PMEPA1
m6A-circCAMLG	miR-326	MGST2
m6A-circCAMLG	miR-326	C19orf47
m6A-circCAMLG	miR-326	DGKZ
m6A-circCAMLG	miR-326	POLR3H
m6A-circCAMLG	miR-326	HGFAC
m6A-circCAMLG	miR-326	UROS
m6A-circCAMLG	miR-326	ENSSSCG00000040253
m6A-circCAMLG	miR-326	HS1BP3
m6A-circCAMLG	miR-326	MLLT6
m6A-circCAMLG	miR-326	ITM2C
m6A-circCAMLG	miR-326	ZDHHC8
m6A-circCAMLG	miR-326	DAG1
m6A-circCAMLG	miR-326	PDK2
m6A-circCAMLG	miR-326	MYO1D
m6A-circCAMLG	miR-326	SLC38A10
m6A-circCAMLG	miR-326	RBFOX1
m6A-circCAMLG	miR-326	YPEL2
m6A-circCAMLG	miR-326	GLOD5
m6A-circCAMLG	miR-326	FOSL2
m6A-circCAMLG	miR-326	ENSSSCG00000032166
m6A-circCAMLG	miR-326	GPRC5C
m6A-circCAMLG	miR-326	NDEL1
m6A-circCAMLG	miR-326	PGBD5
m6A-circCAMLG	miR-326	PSMD8
m6A-circCAMLG	miR-326	RAB43
m6A-circCAMLG	miR-326	RLBP1
m6A-circCAMLG	miR-326	HOXC9
m6A-circCAMLG	miR-326	HDLBP
m6A-circCAMLG	miR-326	ZFAND2B
m6A-circCAMLG	miR-326	ENSSSCG00000039860
m6A-circCAMLG	miR-326	CELF3
m6A-circCAMLG	miR-326	CALY
m6A-circCAMLG	miR-326	SOX7
m6A-circCAMLG	miR-326	KLK11
m6A-circCAMLG	miR-326	DPM2
m6A-circCAMLG	miR-326	DNASE1
m6A-circCAMLG	miR-326	MTMR14
m6A-circCAMLG	miR-326	MOB3A
m6A-circCAMLG	miR-326	TMEM88
m6A-circCAMLG	miR-326	ASB2
m6A-circCAMLG	miR-326	NAPRT
m6A-circCAMLG	miR-326	KCTD15
m6A-circCAMLG	miR-326	TMEM179
m6A-circCAMLG	miR-326	ENSSSCG00000001516
m6A-circCAMLG	miR-326	SPRYD3
m6A-circCAMLG	miR-326	INKA2
m6A-circCAMLG	miR-326	LIMD2
m6A-circCAMLG	miR-326	ELP3
m6A-circCAMLG	miR-326	HROB
m6A-circCAMLG	miR-326	ENSSSCG00000061680
m6A-circCAMLG	miR-326	NOS3
m6A-circCAMLG	miR-326	FGFR3
m6A-circCAMLG	miR-326	FBLN1
m6A-circCAMLG	miR-326	TULP3
m6A-circCAMLG	miR-326	EFNA1
m6A-circCAMLG	miR-326	PGAP3
m6A-circCAMLG	miR-326	DPYSL3
m6A-circCAMLG	miR-326	PCYT2
m6A-circCAMLG	miR-326	CPAMD8
m6A-circCAMLG	miR-326	RARA
m6A-circCAMLG	miR-326	LYPD1
m6A-circCAMLG	miR-326	RGS19
m6A-circCAMLG	miR-326	PAX7
m6A-circCAMLG	miR-326	FLNB
m6A-circCAMLG	miR-326	SNX22
m6A-circCAMLG	miR-326	TMEM88B
m6A-circCAMLG	miR-326	ENSSSCG00000034192
m6A-circCAMLG	miR-326	PWWP3A
m6A-circCAMLG	miR-326	KANK2
m6A-circCAMLG	miR-326	NAPSA
m6A-circCAMLG	miR-326	EPGN
m6A-circCAMLG	miR-326	IRF4
m6A-circCAMLG	miR-326	IRF5
m6A-circCAMLG	miR-326	ARID5A
m6A-circCAMLG	miR-326	ENSSSCG00000034540
m6A-circCAMLG	miR-326	CD276
m6A-circCAMLG	miR-326	RNPEP
m6A-circCAMLG	miR-326	NGEF
m6A-circCAMLG	miR-326	DDIT4
m6A-circCAMLG	miR-326	EIF4B
m6A-circCAMLG	miR-326	PANK4
m6A-circCAMLG	miR-326	ATP13A1
m6A-circCAMLG	miR-326	TMEM54
m6A-circCAMLG	miR-326	CNOT3
m6A-circCAMLG	miR-326	SNAI3
m6A-circCAMLG	miR-326	ARHGEF1
m6A-circCAMLG	miR-326	EHD3
m6A-circCAMLG	miR-326	OSBPL5
m6A-circCAMLG	miR-326	UNC119B
m6A-circCAMLG	miR-326	LDAF1
m6A-circCAMLG	miR-326	ELL
m6A-circCAMLG	miR-326	ENSSSCG00000035997
m6A-circCAMLG	miR-326	MFAP4
m6A-circCAMLG	miR-326	GMDS
m6A-circCAMLG	miR-326	DNAJB2
m6A-circCAMLG	miR-326	ENSSSCG00000032110
m6A-circCAMLG	miR-326	ENSSSCG00000004703
m6A-circCAMLG	miR-326	TSPAN14
m6A-circCAMLG	miR-326	EEFSEC
m6A-circCAMLG	miR-326	TMPRSS13
m6A-circCAMLG	miR-326	WRAP53
m6A-circCAMLG	miR-326	ETFA
m6A-circCAMLG	miR-326	GRB7
m6A-circCAMLG	miR-326	RPL35
m6A-circCAMLG	miR-326	CNN1
m6A-circCAMLG	miR-326	SH2D3C
m6A-circCAMLG	miR-326	MAP3K3
m6A-circCAMLG	miR-326	DOLPP1
m6A-circCAMLG	miR-326	TOM1
m6A-circCAMLG	miR-326	ACTB
m6A-circCAMLG	miR-326	NBL1
m6A-circCAMLG	miR-326	ENSSSCG00000039259
m6A-circCAMLG	miR-326	ENSSSCG00000010992
m6A-circCAMLG	miR-326	CHD5
m6A-circCAMLG	miR-326	ING5
m6A-circCAMLG	miR-326	EVC
m6A-circCAMLG	miR-326	MEF2D
m6A-circCAMLG	miR-326	ENSSSCG00000031595
m6A-circCAMLG	miR-326	PCGF2
m6A-circCAMLG	miR-326	HILPDA
m6A-circCAMLG	miR-326	FXYD3
m6A-circCAMLG	miR-326	ASCC2
m6A-circCAMLG	miR-326	SNX8
m6A-circCAMLG	miR-326	LSM14B
m6A-circCAMLG	miR-326	LRP10
m6A-circCAMLG	miR-326	LY6E
m6A-circCAMLG	miR-326	GLT1D1
m6A-circCAMLG	miR-326	CLCN2
m6A-circCAMLG	miR-326	ZNF394
m6A-circCAMLG	miR-326	TCERG1L
m6A-circCAMLG	miR-326	CORO1B
m6A-circCAMLG	miR-326	ENSSSCG00000012088
m6A-circCAMLG	miR-326	DCAKD
m6A-circCAMLG	miR-326	TRAPPC2L
m6A-circCAMLG	miR-326	GPSM1
m6A-circCAMLG	miR-326	ENSSSCG00000026817
m6A-circCAMLG	miR-326	UPF1
m6A-circCAMLG	miR-326	MMP28
m6A-circCAMLG	miR-326	GALNT6
m6A-circCAMLG	miR-326	FBF1
m6A-circCAMLG	miR-326	SLC35C2
m6A-circCAMLG	miR-326	PTDSS2
m6A-circCAMLG	miR-326	ECI1
m6A-circCAMLG	miR-326	ERICH4
m6A-circCAMLG	miR-326	MAPK11
m6A-circCAMLG	miR-326	PCYT1B
m6A-circCAMLG	miR-326	KIF5A
m6A-circCAMLG	miR-326	ANKRD52
m6A-circCAMLG	miR-326	SPSB1
m6A-circCAMLG	miR-326	GNB1L
m6A-circCAMLG	miR-326	CCL8
m6A-circCAMLG	miR-326	NEU4
m6A-circCAMLG	miR-326	BCS1L
m6A-circCAMLG	miR-326	MOK
m6A-circCAMLG	miR-326	ENSSSCG00000021624
m6A-circCAMLG	miR-326	PARP6
m6A-circCAMLG	miR-326	PLA2G6
m6A-circCAMLG	miR-326	SURF2
m6A-circCAMLG	miR-326	RELA
m6A-circCAMLG	miR-326	KDM5A
m6A-circCAMLG	miR-326	POLR3E
m6A-circCAMLG	miR-326	PRR33
m6A-circCAMLG	miR-326	AMPD2
m6A-circCAMLG	miR-326	SIGMAR1
m6A-circCAMLG	miR-326	PBXIP1
m6A-circCAMLG	miR-326	LIF
m6A-circCAMLG	miR-326	ENSSSCG00000009293
m6A-circCAMLG	miR-326	SNRNP70
m6A-circCAMLG	miR-326	MYO9B
m6A-circCAMLG	miR-326	PTK6
m6A-circCAMLG	miR-326	LYRM4
m6A-circCAMLG	miR-326	TOB2
m6A-circCAMLG	miR-326	FMNL1
m6A-circCAMLG	miR-326	PIGH
m6A-circCAMLG	miR-326	QSOX2
m6A-circCAMLG	miR-326	GTPBP3
m6A-circCAMLG	miR-326	ENSSSCG00000004520
m6A-circCAMLG	miR-326	FGFR1
m6A-circCAMLG	miR-326	ENSSSCG00000005311
m6A-circCAMLG	miR-326	CD6
m6A-circCAMLG	miR-326	SAMD4B
m6A-circCAMLG	miR-326	CD83
m6A-circCAMLG	miR-326	IGF2BP2
m6A-circCAMLG	miR-326	PELI3
m6A-circCAMLG	miR-326	NCALD
m6A-circCAMLG	miR-326	ENSSSCG00000006588
m6A-circCAMLG	miR-326	ENSSSCG00000023014
m6A-circCAMLG	miR-326	IFIT1
m6A-circCAMLG	miR-326	RNF43
m6A-circCAMLG	miR-326	DUSP9
m6A-circCAMLG	miR-326	SAMD14
m6A-circCAMLG	miR-326	SLC4A1
m6A-circCAMLG	miR-326	TGFB3
m6A-circCAMLG	miR-326	HPCAL1
m6A-circCAMLG	miR-326	CD79B
m6A-circCAMLG	miR-326	F13A1
m6A-circCAMLG	miR-326	TAB1
m6A-circCAMLG	miR-326	NRP1
m6A-circCAMLG	miR-326	BCL3
m6A-circCAMLG	miR-326	ZDHHC9
m6A-circCAMLG	miR-326	PPT2
m6A-circCAMLG	miR-326	CBS
m6A-circCAMLG	miR-326	ENSSSCG00000040080
m6A-circCAMLG	miR-326	PPP2R3B
m6A-circCAMLG	miR-326	MSRB1
m6A-circCAMLG	miR-326	ENSSSCG00000063127
m6A-circCAMLG	miR-326	PLXNA1
m6A-circCAMLG	miR-326	CA14
m6A-circCAMLG	miR-326	EFNB1
m6A-circCAMLG	miR-326	PALM
m6A-circCAMLG	miR-326	ENSSSCG00000033735
m6A-circCAMLG	miR-326	GABRD
m6A-circCAMLG	miR-326	GPR68
m6A-circCAMLG	miR-326	FADS2
m6A-circCAMLG	miR-326	RAB25
m6A-circCAMLG	miR-326	MAPK8IP3
m6A-circCAMLG	miR-326	B3GAT1
m6A-circCAMLG	miR-326	OGFOD2
m6A-circCAMLG	miR-326	CETN2
m6A-circCAMLG	miR-326	RFC5
m6A-circCAMLG	miR-326	GGA1
m6A-circCAMLG	miR-326	ENSSSCG00000056881
m6A-circCAMLG	miR-326	AQP3
m6A-circCAMLG	miR-326	SLC39A5
m6A-circCAMLG	miR-326	ARID5B
m6A-circCAMLG	miR-326	CDH15
m6A-circCAMLG	miR-326	MAP2K7
m6A-circCAMLG	miR-326	RAMP3
m6A-circCAMLG	miR-326	SNX19
m6A-circCAMLG	miR-326	VPS25
m6A-circCAMLG	miR-326	MDFI
m6A-circCAMLG	miR-326	ARL8A
m6A-circCAMLG	miR-326	RTN4RL1
m6A-circCAMLG	miR-326	ITIH4
m6A-circCAMLG	miR-326	DNAI1
m6A-circCAMLG	miR-326	TSPAN11
m6A-circCAMLG	miR-326	TMEM185B
m6A-circCAMLG	miR-326	ENSSSCG00000007719
m6A-circCAMLG	miR-326	TADA2B
m6A-circCAMLG	miR-326	NOC2L
m6A-circCAMLG	miR-326	PKP1
m6A-circCAMLG	miR-326	ENSSSCG00000031398
m6A-circCAMLG	miR-326	PRKCD
m6A-circCAMLG	miR-326	YY1
m6A-circCAMLG	miR-326	KLHL33
m6A-circCAMLG	miR-326	USP22
m6A-circCAMLG	miR-326	PHF8
m6A-circCAMLG	miR-326	CHAC1
m6A-circCAMLG	miR-326	CUEDC2
m6A-circCAMLG	miR-326	WDTC1
m6A-circCAMLG	miR-326	SEPTIN2
m6A-circCAMLG	miR-326	LHX3
m6A-circCAMLG	miR-326	TMEM63B
m6A-circCAMLG	miR-326	NID1
m6A-circCAMLG	miR-326	PLIN4
m6A-circCAMLG	miR-326	SH3GLB2
m6A-circCAMLG	miR-326	BCKDHA
m6A-circCAMLG	miR-326	TNNI1
m6A-circCAMLG	miR-326	CLDN2
m6A-circCAMLG	miR-326	RAB17
m6A-circCAMLG	miR-326	SLC12A7
m6A-circCAMLG	miR-326	FKBP8
m6A-circCAMLG	miR-326	ENSSSCG00000061743
m6A-circCAMLG	miR-326	GSK3B
m6A-circCAMLG	miR-326	STRN4
m6A-circCAMLG	miR-326	TMUB2
m6A-circCAMLG	miR-326	AMIGO3
m6A-circCAMLG	miR-326	SIDT1
m6A-circCAMLG	miR-326	KLK9
m6A-circCAMLG	miR-326	COL6A1
m6A-circCAMLG	miR-326	SOST
m6A-circCAMLG	miR-326	IL34
m6A-circCAMLG	miR-326	PRMT8
m6A-circCAMLG	miR-326	SLX4
m6A-circCAMLG	miR-326	C15orf62
m6A-circCAMLG	miR-326	SLC34A1
m6A-circCAMLG	miR-326	ACSL5
m6A-circCAMLG	miR-326	CHST8
m6A-circCAMLG	miR-326	COL9A3
m6A-circCAMLG	miR-326	GMPPB
m6A-circCAMLG	miR-326	SCML4
m6A-circCAMLG	miR-326	PANK2
m6A-circCAMLG	miR-326	BCL7A
m6A-circCAMLG	miR-326	MEF2B
m6A-circCAMLG	miR-326	KCNT1
m6A-circCAMLG	miR-326	BMERB1
m6A-circCAMLG	miR-326	ALKBH7
m6A-circCAMLG	miR-326	FOXK2
m6A-circCAMLG	miR-326	NPTX1
m6A-circCAMLG	miR-326	SEPTIN9
m6A-circCAMLG	miR-326	MGAT5B
m6A-circCAMLG	miR-326	FOXJ1
m6A-circCAMLG	miR-326	ENSSSCG00000017192
m6A-circCAMLG	miR-326	TEN1
m6A-circCAMLG	miR-326	CDK3
m6A-circCAMLG	miR-326	MRPL38
m6A-circCAMLG	miR-326	UNK
m6A-circCAMLG	miR-326	ENSSSCG00000017214
m6A-circCAMLG	miR-326	FADS6
m6A-circCAMLG	miR-326	TMEM104
m6A-circCAMLG	miR-326	SCN4A
m6A-circCAMLG	miR-326	PSMC5
m6A-circCAMLG	miR-326	MRC2
m6A-circCAMLG	miR-326	MYL4
m6A-circCAMLG	miR-326	PLEKHM1
m6A-circCAMLG	miR-326	ENSSSCG00000017331
m6A-circCAMLG	miR-326	EFTUD2
m6A-circCAMLG	miR-326	MEOX1
m6A-circCAMLG	miR-326	ETV4
m6A-circCAMLG	miR-326	HAP1
m6A-circCAMLG	miR-326	CCR7
m6A-circCAMLG	miR-326	IGFBP4
m6A-circCAMLG	miR-326	TCAP
m6A-circCAMLG	miR-326	ENSSSCG00000017515
m6A-circCAMLG	miR-326	NXPH3
m6A-circCAMLG	miR-326	RAB11FIP4
m6A-circCAMLG	miR-326	GIT1
m6A-circCAMLG	miR-326	ANKRD13B
m6A-circCAMLG	miR-326	TRARG1
m6A-circCAMLG	miR-326	SMG6
m6A-circCAMLG	miR-326	METTL16
m6A-circCAMLG	miR-326	SMTNL2
m6A-circCAMLG	miR-326	SLC16A13
m6A-circCAMLG	miR-326	YBX2
m6A-circCAMLG	miR-326	ENSSSCG00000017955
m6A-circCAMLG	miR-326	ALOX15B
m6A-circCAMLG	miR-326	CLDN14
m6A-circCAMLG	miR-326	FLVCR2
m6A-circCAMLG	miR-326	CLIP3
m6A-circCAMLG	miR-326	ALKBH4
m6A-circCAMLG	miR-326	ALDH4A1
m6A-circCAMLG	miR-326	ORAI2
m6A-circCAMLG	miR-326	KLHL22
m6A-circCAMLG	miR-326	ZNF276
m6A-circCAMLG	miR-326	ENSSSCG00000026248
m6A-circCAMLG	miR-326	EIF2B3
m6A-circCAMLG	miR-326	YARS1
m6A-circCAMLG	miR-326	ENSSSCG00000022246
m6A-circCAMLG	miR-326	MAN2B2
m6A-circCAMLG	miR-326	LIG3
m6A-circCAMLG	miR-326	NDUFA4L2
m6A-circCAMLG	miR-326	MMP17
m6A-circCAMLG	miR-326	CACNG7
m6A-circCAMLG	miR-326	COQ10A
m6A-circCAMLG	miR-326	EIF6
m6A-circCAMLG	miR-326	EPHB3
m6A-circCAMLG	miR-326	WDR5
m6A-circCAMLG	miR-326	HCFC1R1
m6A-circCAMLG	miR-326	HOMEZ
m6A-circCAMLG	miR-326	FAM78A
m6A-circCAMLG	miR-326	CDK10
m6A-circCAMLG	miR-326	NRP2
m6A-circCAMLG	miR-326	ENSSSCG00000023603
m6A-circCAMLG	miR-326	AP3B2
m6A-circCAMLG	miR-326	SLX9
m6A-circCAMLG	miR-326	DOK4
m6A-circCAMLG	miR-326	SLC4A8
m6A-circCAMLG	miR-326	WNT9A
m6A-circCAMLG	miR-326	PHRF1
m6A-circCAMLG	miR-326	HDAC11
m6A-circCAMLG	miR-326	PLEKHO1
m6A-circCAMLG	miR-326	EMG1
m6A-circCAMLG	miR-326	LONP1
m6A-circCAMLG	miR-326	DTX2
m6A-circCAMLG	miR-326	SIGIRR
m6A-circCAMLG	miR-326	ENSSSCG00000023320
m6A-circCAMLG	miR-326	ACOT8
m6A-circCAMLG	miR-326	BATF2
m6A-circCAMLG	miR-326	PIAS4
m6A-circCAMLG	miR-326	TROAP
m6A-circCAMLG	miR-326	MUSK
m6A-circCAMLG	miR-326	LRRTM1
m6A-circCAMLG	miR-326	EFR3B
m6A-circCAMLG	miR-326	OTOP2
m6A-circCAMLG	miR-326	P4HA3
m6A-circCAMLG	miR-326	TTYH1
m6A-circCAMLG	miR-326	PDE9A
m6A-circCAMLG	miR-326	BTK
m6A-circCAMLG	miR-326	FSCN1
m6A-circCAMLG	miR-326	COG4
m6A-circCAMLG	miR-326	PROC
m6A-circCAMLG	miR-326	PTGIR
m6A-circCAMLG	miR-326	UBALD2
m6A-circCAMLG	miR-326	PCBP4
m6A-circCAMLG	miR-326	KLHL30
m6A-circCAMLG	miR-326	ENSSSCG00000024070
m6A-circCAMLG	miR-326	SLC49A3
m6A-circCAMLG	miR-326	ZNF526
m6A-circCAMLG	miR-326	PLEKHN1
m6A-circCAMLG	miR-326	CSF2
m6A-circCAMLG	miR-326	GNA11
m6A-circCAMLG	miR-326	ENSSSCG00000028572
m6A-circCAMLG	miR-326	TRAF7
m6A-circCAMLG	miR-326	UBTD1
m6A-circCAMLG	miR-326	MAZ
m6A-circCAMLG	miR-326	ATP1A2
m6A-circCAMLG	miR-326	CNN2
m6A-circCAMLG	miR-326	NAA60
m6A-circCAMLG	miR-326	STAT6
m6A-circCAMLG	miR-326	NAA40
m6A-circCAMLG	miR-326	NECAB3
m6A-circCAMLG	miR-326	KIFC2
m6A-circCAMLG	miR-326	ATP8B2
m6A-circCAMLG	miR-326	ENKD1
m6A-circCAMLG	miR-326	PADI2
m6A-circCAMLG	miR-326	ENSSSCG00000029761
m6A-circCAMLG	miR-326	ALDH1A2
m6A-circCAMLG	miR-326	FRMD1
m6A-circCAMLG	miR-326	RANBP10
m6A-circCAMLG	miR-326	ENSSSCG00000024000
m6A-circCAMLG	miR-326	RRP1B
m6A-circCAMLG	miR-326	TRIM63
m6A-circCAMLG	miR-326	ENSSSCG00000006510
m6A-circCAMLG	miR-326	FAM163B
m6A-circCAMLG	miR-326	DCUN1D2
m6A-circCAMLG	miR-326	ENTPD3
m6A-circCAMLG	miR-326	TMPRSS6
m6A-circCAMLG	miR-326	KHDRBS1
m6A-circCAMLG	miR-326	CDK4
m6A-circCAMLG	miR-326	MYOM1
m6A-circCAMLG	miR-326	SLC5A2
m6A-circCAMLG	miR-326	PRXL2B
m6A-circCAMLG	miR-326	FAM50A
m6A-circCAMLG	miR-326	BCAM
m6A-circCAMLG	miR-326	ZMIZ2
m6A-circCAMLG	miR-326	ADAMTSL2
m6A-circCAMLG	miR-326	KRT31
m6A-circCAMLG	miR-326	SYT12
m6A-circCAMLG	miR-326	STX1B
m6A-circCAMLG	miR-326	FAM20C
m6A-circCAMLG	miR-326	ENSSSCG00000027428
m6A-circCAMLG	miR-326	ENSSSCG00000026302
m6A-circCAMLG	miR-326	ATPAF2
m6A-circCAMLG	miR-326	ENSSSCG00000024676
m6A-circCAMLG	miR-326	XPO7
m6A-circCAMLG	miR-326	BRPF3
m6A-circCAMLG	miR-326	KCNK5
m6A-circCAMLG	miR-326	PLXNA2
m6A-circCAMLG	miR-326	ACAP1
m6A-circCAMLG	miR-326	GIGYF1
m6A-circCAMLG	miR-326	UBE2G2
m6A-circCAMLG	miR-326	ARHGEF16
m6A-circCAMLG	miR-326	REM1
m6A-circCAMLG	miR-326	DNAI2
m6A-circCAMLG	miR-326	HS6ST1
m6A-circCAMLG	miR-326	ELP5
m6A-circCAMLG	miR-326	ENSSSCG00000023172
m6A-circCAMLG	miR-326	BPIFB2
m6A-circCAMLG	miR-326	TUBAL3
m6A-circCAMLG	miR-326	NKIRAS2
m6A-circCAMLG	miR-326	FGD3
m6A-circCAMLG	miR-326	ZNF768
m6A-circCAMLG	miR-326	ENSSSCG00000028777
m6A-circCAMLG	miR-326	CHTF18
m6A-circCAMLG	miR-326	NUBP1
m6A-circCAMLG	miR-326	TBX2
m6A-circCAMLG	miR-326	PHC1
m6A-circCAMLG	miR-326	SNPH
m6A-circCAMLG	miR-326	ENSSSCG00000021560
m6A-circCAMLG	miR-326	ENSSSCG00000025499
m6A-circCAMLG	miR-326	ENSSSCG00000021891
m6A-circCAMLG	miR-326	FKBP15
m6A-circCAMLG	miR-326	MAP2K2
m6A-circCAMLG	miR-326	TRIP10
m6A-circCAMLG	miR-326	MMP25
m6A-circCAMLG	miR-326	VDR
m6A-circCAMLG	miR-326	EMX1
m6A-circCAMLG	miR-326	PLEK
m6A-circCAMLG	miR-326	SRD5A2
m6A-circCAMLG	miR-326	ABHD1
m6A-circCAMLG	miR-326	HADHA
m6A-circCAMLG	miR-326	ENSSSCG00000008599
m6A-circCAMLG	miR-326	TAF1B
m6A-circCAMLG	miR-326	HTRA3
m6A-circCAMLG	miR-326	PACRGL
m6A-circCAMLG	miR-326	SLC10A4
m6A-circCAMLG	miR-326	CDX2
m6A-circCAMLG	miR-326	SLITRK1
m6A-circCAMLG	miR-326	SLC15A1
m6A-circCAMLG	miR-326	ENSSSCG00000009523
m6A-circCAMLG	miR-326	F10
m6A-circCAMLG	miR-326	ROR2
m6A-circCAMLG	miR-326	LZTS1
m6A-circCAMLG	miR-326	PHYHIP
m6A-circCAMLG	miR-326	BIN3
m6A-circCAMLG	miR-326	CLCN3
m6A-circCAMLG	miR-326	MTRFR
m6A-circCAMLG	miR-326	HIP1R
m6A-circCAMLG	miR-326	CFAP73
m6A-circCAMLG	miR-326	HNF1A
m6A-circCAMLG	miR-326	ENSSSCG00000009926
m6A-circCAMLG	miR-326	RNF215
m6A-circCAMLG	miR-326	PES1
m6A-circCAMLG	miR-326	TCN2
m6A-circCAMLG	miR-326	LIMK2
m6A-circCAMLG	miR-326	PIK3IP1
m6A-circCAMLG	miR-326	GNAZ
m6A-circCAMLG	miR-326	HIRA
m6A-circCAMLG	miR-326	EGR2
m6A-circCAMLG	miR-326	DNAJB12
m6A-circCAMLG	miR-326	MSMB
m6A-circCAMLG	miR-326	CCNJ
m6A-circCAMLG	miR-326	PI4K2A
m6A-circCAMLG	miR-326	SFRP5
m6A-circCAMLG	miR-326	NEURL1
m6A-circCAMLG	miR-326	LHPP
m6A-circCAMLG	miR-326	CLRN3
m6A-circCAMLG	miR-326	FUOM
m6A-circCAMLG	miR-326	SCCPDH
m6A-circCAMLG	miR-326	ELF3
m6A-circCAMLG	miR-326	IL11RA
m6A-circCAMLG	miR-326	NOL6
m6A-circCAMLG	miR-326	JCAD
m6A-circCAMLG	miR-326	CSRNP1
m6A-circCAMLG	miR-326	LIMD1
m6A-circCAMLG	miR-326	DUSP7
m6A-circCAMLG	miR-326	PHF7
m6A-circCAMLG	miR-326	LHFPL4
m6A-circCAMLG	miR-326	CPNE9
m6A-circCAMLG	miR-326	PLXND1
m6A-circCAMLG	miR-326	MCM2
m6A-circCAMLG	miR-326	KY
m6A-circCAMLG	miR-326	EIF2B5
m6A-circCAMLG	miR-326	MELTF
m6A-circCAMLG	miR-326	OLIG1
m6A-circCAMLG	miR-326	SYN1
m6A-circCAMLG	miR-326	WDR45
m6A-circCAMLG	miR-326	SYP
m6A-circCAMLG	miR-326	IQSEC2
m6A-circCAMLG	miR-326	FOXO4
m6A-circCAMLG	miR-326	CCNQ
m6A-circCAMLG	miR-326	AVPR2
m6A-circCAMLG	miR-326	CHID1
m6A-circCAMLG	miR-326	ENSSSCG00000012842
m6A-circCAMLG	miR-326	CEND1
m6A-circCAMLG	miR-326	SLC22A18
m6A-circCAMLG	miR-326	RPS6KB2
m6A-circCAMLG	miR-326	PPP1CA
m6A-circCAMLG	miR-326	CLCF1
m6A-circCAMLG	miR-326	CCDC87
m6A-circCAMLG	miR-326	TMEM151A
m6A-circCAMLG	miR-326	PPP2R5B
m6A-circCAMLG	miR-326	PYGB
m6A-circCAMLG	miR-326	ESRRA
m6A-circCAMLG	miR-326	ENSSSCG00000013042
m6A-circCAMLG	miR-326	SPINDOC
m6A-circCAMLG	miR-326	RAB3IL1
m6A-circCAMLG	miR-326	ACP2
m6A-circCAMLG	miR-326	CHRM4
m6A-circCAMLG	miR-326	SLC35C1
m6A-circCAMLG	miR-326	TSPAN18
m6A-circCAMLG	miR-326	TMEM86A
m6A-circCAMLG	miR-326	ADAMTSL5
m6A-circCAMLG	miR-326	NCLN
m6A-circCAMLG	miR-326	PLIN5
m6A-circCAMLG	miR-326	DUS3L
m6A-circCAMLG	miR-326	DENND1C
m6A-circCAMLG	miR-326	ANGPTL4
m6A-circCAMLG	miR-326	ELAVL3
m6A-circCAMLG	miR-326	PDE4A
m6A-circCAMLG	miR-326	RAVER1
m6A-circCAMLG	miR-326	S1PR2
m6A-circCAMLG	miR-326	NACC1
m6A-circCAMLG	miR-326	ZSWIM4
m6A-circCAMLG	miR-326	PALM3
m6A-circCAMLG	miR-326	ASF1B
m6A-circCAMLG	miR-326	PTGER1
m6A-circCAMLG	miR-326	SYDE1
m6A-circCAMLG	miR-326	SMIM7
m6A-circCAMLG	miR-326	IL12RB1
m6A-circCAMLG	miR-326	CILP2
m6A-circCAMLG	miR-326	GJC2
m6A-circCAMLG	miR-326	MGAT4B
m6A-circCAMLG	miR-326	B4GALT7
m6A-circCAMLG	miR-326	TMED9
m6A-circCAMLG	miR-326	LMAN2
m6A-circCAMLG	miR-326	ENSSSCG00000014043
m6A-circCAMLG	miR-326	NOP16
m6A-circCAMLG	miR-326	MCC
m6A-circCAMLG	miR-326	FCHSD1
m6A-circCAMLG	miR-326	PPARGC1B
m6A-circCAMLG	miR-326	HMGXB3
m6A-circCAMLG	miR-326	TCOF1
m6A-circCAMLG	miR-326	APBB1
m6A-circCAMLG	miR-326	RNF121
m6A-circCAMLG	miR-326	COA4
m6A-circCAMLG	miR-326	ENSSSCG00000014861
m6A-circCAMLG	miR-326	LRRC32
m6A-circCAMLG	miR-326	LAYN
m6A-circCAMLG	miR-326	ZPR1
m6A-circCAMLG	miR-326	IL10RA
m6A-circCAMLG	miR-326	ENSSSCG00000059517
m6A-circCAMLG	miR-326	C2CD2L
m6A-circCAMLG	miR-326	TOR3A
m6A-circCAMLG	miR-326	KIAA1614
m6A-circCAMLG	miR-326	FLVCR1
m6A-circCAMLG	miR-326	NEK2
m6A-circCAMLG	miR-326	CAMK1G
m6A-circCAMLG	miR-326	ERCC3
m6A-circCAMLG	miR-326	AAMP
m6A-circCAMLG	miR-326	IHH
m6A-circCAMLG	miR-326	NMUR1
m6A-circCAMLG	miR-326	HES6
m6A-circCAMLG	miR-326	ENSSSCG00000016400
m6A-circCAMLG	miR-326	CHPF2
m6A-circCAMLG	miR-326	SLC35B4
m6A-circCAMLG	miR-326	KLF14
m6A-circCAMLG	miR-326	TBRG4
m6A-circCAMLG	miR-326	TMED4
m6A-circCAMLG	miR-326	GCK
m6A-circCAMLG	miR-326	NSG2
m6A-circCAMLG	miR-326	KCNMB1
m6A-circCAMLG	miR-326	CCNJL
m6A-circCAMLG	miR-326	POMT2
m6A-circCAMLG	miR-326	LEMD2
m6A-circCAMLG	miR-326	PRF1
m6A-circCAMLG	miR-326	C19orf54
m6A-circCAMLG	miR-326	SRRM1
m6A-circCAMLG	miR-326	KIAA0319L
m6A-circCAMLG	miR-326	ITPR3
m6A-circCAMLG	miR-326	CDH5
m6A-circCAMLG	miR-326	HOXC5
m6A-circCAMLG	miR-326	EML1
m6A-circCAMLG	miR-326	PDE2A
m6A-circCAMLG	miR-326	LCN2
m6A-circCAMLG	miR-326	C1QL1
m6A-circCAMLG	miR-326	YIPF3
m6A-circCAMLG	miR-326	MCRS1
m6A-circCAMLG	miR-326	PSEN2
m6A-circCAMLG	miR-326	RUNDC3A
m6A-circCAMLG	miR-326	SLC4A11
m6A-circCAMLG	miR-326	LMX1B
m6A-circCAMLG	miR-326	VPS37D
m6A-circCAMLG	miR-326	ZNF710
m6A-circCAMLG	miR-326	ENSSSCG00000040118
m6A-circCAMLG	miR-326	CYP4B1
m6A-circCAMLG	miR-326	ENSSSCG00000012886
m6A-circCAMLG	miR-326	CDC20
m6A-circCAMLG	miR-326	ENSSSCG00000035000
m6A-circCAMLG	miR-326	ENSSSCG00000011676
m6A-circCAMLG	miR-326	SLC43A1
m6A-circCAMLG	miR-326	ESRRB
m6A-circCAMLG	miR-326	S100A12
m6A-circCAMLG	miR-326	BAHD1
m6A-circCAMLG	miR-326	PRKX
m6A-circCAMLG	miR-326	SPIB
m6A-circCAMLG	miR-326	NENF
m6A-circCAMLG	miR-326	ENSSSCG00000000002
m6A-circCAMLG	miR-326	CSDC2
m6A-circCAMLG	miR-326	FAM83F
m6A-circCAMLG	miR-326	NPTXR
m6A-circCAMLG	miR-326	BAIAP2L2
m6A-circCAMLG	miR-326	ANKRD54
m6A-circCAMLG	miR-326	CYTH4
m6A-circCAMLG	miR-326	RTCB
m6A-circCAMLG	miR-326	CCDC65
m6A-circCAMLG	miR-326	C1QL4
m6A-circCAMLG	miR-326	AQP5
m6A-circCAMLG	miR-326	ASIC1
m6A-circCAMLG	miR-326	ACVRL1
m6A-circCAMLG	miR-326	ACVR1B
m6A-circCAMLG	miR-326	TAMALIN
m6A-circCAMLG	miR-326	SOAT2
m6A-circCAMLG	miR-326	STAT2
m6A-circCAMLG	miR-326	NAB2
m6A-circCAMLG	miR-326	PIP4K2C
m6A-circCAMLG	miR-326	USP5
m6A-circCAMLG	miR-326	LRTM2
m6A-circCAMLG	miR-326	MYF6
m6A-circCAMLG	miR-326	MLC1
m6A-circCAMLG	miR-326	ENSSSCG00000000983
m6A-circCAMLG	miR-326	GPX5
m6A-circCAMLG	miR-326	ZBTB12
m6A-circCAMLG	miR-326	ENSSSCG00000001427
m6A-circCAMLG	miR-326	TAP2
m6A-circCAMLG	miR-326	RXRB
m6A-circCAMLG	miR-326	GRM4
m6A-circCAMLG	miR-326	SCUBE3
m6A-circCAMLG	miR-326	RRP36
m6A-circCAMLG	miR-326	PTK7
m6A-circCAMLG	miR-326	SLC25A27
m6A-circCAMLG	miR-326	SH2D7
m6A-circCAMLG	miR-326	WDR93
m6A-circCAMLG	miR-326	CSPG4
m6A-circCAMLG	miR-326	SNUPN
m6A-circCAMLG	miR-326	C15orf39
m6A-circCAMLG	miR-326	SCAMP5
m6A-circCAMLG	miR-326	CYP1A1
m6A-circCAMLG	miR-326	STOML1
m6A-circCAMLG	miR-326	CBLN3
m6A-circCAMLG	miR-326	RIPK3
m6A-circCAMLG	miR-326	RABGGTA
m6A-circCAMLG	miR-326	TM9SF1
m6A-circCAMLG	miR-326	THTPA
m6A-circCAMLG	miR-326	CMTM5
m6A-circCAMLG	miR-326	ENSSSCG00000002034
m6A-circCAMLG	miR-326	ENSSSCG00000002259
m6A-circCAMLG	miR-326	SPTB
m6A-circCAMLG	miR-326	FNTB
m6A-circCAMLG	miR-326	PLEKHD1
m6A-circCAMLG	miR-326	RPS6KL1
m6A-circCAMLG	miR-326	TMEM63C
m6A-circCAMLG	miR-326	TTC8
m6A-circCAMLG	miR-326	DEGS2
m6A-circCAMLG	miR-326	GAS8
m6A-circCAMLG	miR-326	TUBB3
m6A-circCAMLG	miR-326	GALNS
m6A-circCAMLG	miR-326	KIAA0513
m6A-circCAMLG	miR-326	VAT1L
m6A-circCAMLG	miR-326	NOB1
m6A-circCAMLG	miR-326	ATP6V0D1
m6A-circCAMLG	miR-326	MMP15
m6A-circCAMLG	miR-326	KATNB1
m6A-circCAMLG	miR-326	ADGRG3
m6A-circCAMLG	miR-326	PLEKHF1
m6A-circCAMLG	miR-326	SLC7A10
m6A-circCAMLG	miR-326	GPI
m6A-circCAMLG	miR-326	LIN37
m6A-circCAMLG	miR-326	CYP2F1
m6A-circCAMLG	miR-326	TMEM145
m6A-circCAMLG	miR-326	BSP1
m6A-circCAMLG	miR-326	CADM4
m6A-circCAMLG	miR-326	KCNN4
m6A-circCAMLG	miR-326	PPP5C
m6A-circCAMLG	miR-326	NAPA
m6A-circCAMLG	miR-326	GRWD1
m6A-circCAMLG	miR-326	FUT2
m6A-circCAMLG	miR-326	RRAS
m6A-circCAMLG	miR-326	PNKP
m6A-circCAMLG	miR-326	ENSSSCG00000003227
m6A-circCAMLG	miR-326	NKG7
m6A-circCAMLG	miR-326	PRKCG
m6A-circCAMLG	miR-326	CHD4
m6A-circCAMLG	miR-326	KLHL21
m6A-circCAMLG	miR-326	PARK7
m6A-circCAMLG	miR-326	PDPN
m6A-circCAMLG	miR-326	AKR7A2
m6A-circCAMLG	miR-326	SFN
m6A-circCAMLG	miR-326	NR0B2
m6A-circCAMLG	miR-326	RPA2
m6A-circCAMLG	miR-326	FAM167B
m6A-circCAMLG	miR-326	FHL3
m6A-circCAMLG	miR-326	SLC1A7
m6A-circCAMLG	miR-326	SLC5A9
m6A-circCAMLG	miR-326	PLK3
m6A-circCAMLG	miR-326	HYI
m6A-circCAMLG	miR-326	IGF2R
m6A-circCAMLG	miR-326	HEY2
m6A-circCAMLG	miR-326	SMPD2
m6A-circCAMLG	miR-326	FRK
m6A-circCAMLG	miR-326	SHF
m6A-circCAMLG	miR-326	IGDCC3
m6A-circCAMLG	miR-326	SMAD3
m6A-circCAMLG	miR-326	LARP6
m6A-circCAMLG	miR-326	PRKCH
m6A-circCAMLG	miR-326	AEN
m6A-circCAMLG	miR-326	RGP1
m6A-circCAMLG	miR-326	ALDH1B1
m6A-circCAMLG	miR-326	CRB2
m6A-circCAMLG	miR-326	CDK9
m6A-circCAMLG	miR-326	CERCAM
m6A-circCAMLG	miR-326	LRRC8A
m6A-circCAMLG	miR-326	FIBCD1
m6A-circCAMLG	miR-326	TTF1
m6A-circCAMLG	miR-326	VAV2
m6A-circCAMLG	miR-326	BRD3
m6A-circCAMLG	miR-326	ENSSSCG00000005756
m6A-circCAMLG	miR-326	FOXH1
m6A-circCAMLG	miR-326	GPAA1
m6A-circCAMLG	miR-326	KCNV1
m6A-circCAMLG	miR-326	GRHL2
m6A-circCAMLG	miR-326	STAU2
m6A-circCAMLG	miR-326	GPA33
m6A-circCAMLG	miR-326	VANGL2
m6A-circCAMLG	miR-326	LRRC71
m6A-circCAMLG	miR-326	HDGF
m6A-circCAMLG	miR-326	CRABP2
m6A-circCAMLG	miR-326	HCN3
m6A-circCAMLG	miR-326	THBS3
m6A-circCAMLG	miR-326	KCNN3
m6A-circCAMLG	miR-326	INTS3
m6A-circCAMLG	miR-326	NPR1
m6A-circCAMLG	miR-326	PI4KB
m6A-circCAMLG	miR-326	ATP1A1
m6A-circCAMLG	miR-326	RHOC
m6A-circCAMLG	miR-326	SLC6A17
m6A-circCAMLG	miR-326	EPS8L3
m6A-circCAMLG	miR-326	BARHL2
m6A-circCAMLG	miR-326	ZC3H3
m6A-circCAMLG	miR-326	RHPN1
m6A-circCAMLG	miR-326	CPXM1
m6A-circCAMLG	miR-326	NOP56
m6A-circCAMLG	miR-326	PDRG1
m6A-circCAMLG	miR-326	DSN1
m6A-circCAMLG	miR-326	ENSSSCG00000007336
m6A-circCAMLG	miR-326	RALGAPB
m6A-circCAMLG	miR-326	TOMM34
m6A-circCAMLG	miR-326	PIGT
m6A-circCAMLG	miR-326	NEURL2
m6A-circCAMLG	miR-326	CDH22
m6A-circCAMLG	miR-326	SLC9A8
m6A-circCAMLG	miR-326	KCNG1
m6A-circCAMLG	miR-326	RBM38
m6A-circCAMLG	miR-326	CYP2W1
m6A-circCAMLG	miR-326	ENSSSCG00000007552
m6A-circCAMLG	miR-326	TMEM184A
m6A-circCAMLG	miR-326	AP5Z1
m6A-circCAMLG	miR-326	MMD2
m6A-circCAMLG	miR-326	NPTX2
m6A-circCAMLG	miR-326	TFR2
m6A-circCAMLG	miR-326	FKBP6
m6A-circCAMLG	miR-326	PHKG1
m6A-circCAMLG	miR-326	KAT8
m6A-circCAMLG	miR-326	PRSS53
m6A-circCAMLG	miR-326	GTF3C1
m6A-circCAMLG	miR-326	ZNF200
m6A-circCAMLG	miR-326	NPRL3
m6A-circCAMLG	miR-326	CAPN15
m6A-circCAMLG	miR-326	RHBDL1
m6A-circCAMLG	miR-326	ENSSSCG00000008001
m6A-circCAMLG	miR-326	CIAO3
m6A-circCAMLG	miR-326	IGFALS
m6A-circCAMLG	miR-326	SLC9A3R2
m6A-circCAMLG	miR-326	PHF2
m6A-circCAMLG	miR-326	ENSSSCG00000008097
m6A-circCAMLG	miR-330	SBF1
m6A-circCAMLG	miR-330	MYO5C
m6A-circCAMLG	miR-330	GATD3
m6A-circCAMLG	miR-330	SLC39A13
m6A-circCAMLG	miR-330	MED22
m6A-circCAMLG	miR-330	ENSSSCG00000033858
m6A-circCAMLG	miR-330	GPC1
m6A-circCAMLG	miR-330	FBXO31
m6A-circCAMLG	miR-330	CSNK1G1
m6A-circCAMLG	miR-330	ENSSSCG00000061550
m6A-circCAMLG	miR-330	RNF44
m6A-circCAMLG	miR-330	SPECC1
m6A-circCAMLG	miR-330	ARHGEF18
m6A-circCAMLG	miR-330	MCF2L
m6A-circCAMLG	miR-330	OPN4
m6A-circCAMLG	miR-330	DNAJC17
m6A-circCAMLG	miR-330	MAPK3
m6A-circCAMLG	miR-330	KIF26A
m6A-circCAMLG	miR-330	ACAD10
m6A-circCAMLG	miR-330	KRT78
m6A-circCAMLG	miR-330	NUP188
m6A-circCAMLG	miR-330	GNMT
m6A-circCAMLG	miR-330	ZER1
m6A-circCAMLG	miR-330	CC2D1A
m6A-circCAMLG	miR-330	FBXL12
m6A-circCAMLG	miR-330	BSDC1
m6A-circCAMLG	miR-330	SNAPC4
m6A-circCAMLG	miR-330	TCF4
m6A-circCAMLG	miR-330	ASPG
m6A-circCAMLG	miR-330	INPP5E
m6A-circCAMLG	miR-330	CRAT
m6A-circCAMLG	miR-330	MRTFB
m6A-circCAMLG	miR-330	DUSP29
m6A-circCAMLG	miR-330	PAX2
m6A-circCAMLG	miR-330	ATP2B2
m6A-circCAMLG	miR-330	ENSSSCG00000040854
m6A-circCAMLG	miR-330	ABLIM3
m6A-circCAMLG	miR-330	PIK3R4
m6A-circCAMLG	miR-330	SCG5
m6A-circCAMLG	miR-330	GRINA
m6A-circCAMLG	miR-330	DAPK2
m6A-circCAMLG	miR-330	BICDL1
m6A-circCAMLG	miR-330	ENSSSCG00000031300
m6A-circCAMLG	miR-330	CLDN19
m6A-circCAMLG	miR-330	PKM
m6A-circCAMLG	miR-330	TMEM59L
m6A-circCAMLG	miR-330	TNFSF12
m6A-circCAMLG	miR-330	GRIK4
m6A-circCAMLG	miR-330	COL8A2
m6A-circCAMLG	miR-330	GAPVD1
m6A-circCAMLG	miR-330	BIN1
m6A-circCAMLG	miR-330	GALNT11
m6A-circCAMLG	miR-330	ARFGAP1
m6A-circCAMLG	miR-330	CENPM
m6A-circCAMLG	miR-330	NFYC
m6A-circCAMLG	miR-330	ENSSSCG00000038719
m6A-circCAMLG	miR-330	RFNG
m6A-circCAMLG	miR-330	TLN2
m6A-circCAMLG	miR-330	CACFD1
m6A-circCAMLG	miR-330	ATXN7L1
m6A-circCAMLG	miR-330	SCFD1
m6A-circCAMLG	miR-330	LDLRAD3
m6A-circCAMLG	miR-330	ATPAF1
m6A-circCAMLG	miR-330	TSEN54
m6A-circCAMLG	miR-330	NMRK2
m6A-circCAMLG	miR-330	HSF1
m6A-circCAMLG	miR-330	ADD1
m6A-circCAMLG	miR-330	CXCR5
m6A-circCAMLG	miR-330	DDX54
m6A-circCAMLG	miR-330	SCRN1
m6A-circCAMLG	miR-330	ST3GAL3
m6A-circCAMLG	miR-330	RPL23A
m6A-circCAMLG	miR-330	TRIM11
m6A-circCAMLG	miR-330	TMC6
m6A-circCAMLG	miR-330	SLC39A1
m6A-circCAMLG	miR-330	FAM131C
m6A-circCAMLG	miR-330	SNX32
m6A-circCAMLG	miR-330	ENSSSCG00000035527
m6A-circCAMLG	miR-330	UFC1
m6A-circCAMLG	miR-330	USP36
m6A-circCAMLG	miR-330	ATP1A1
m6A-circCAMLG	miR-330	PCP2
m6A-circCAMLG	miR-330	CAVIN1
m6A-circCAMLG	miR-330	FBXO6
m6A-circCAMLG	miR-330	PKNOX1
m6A-circCAMLG	miR-330	CENPA
m6A-circCAMLG	miR-330	LEF1
m6A-circCAMLG	miR-330	TNNT3
m6A-circCAMLG	miR-330	FRMD4A
m6A-circCAMLG	miR-330	CACNB1
m6A-circCAMLG	miR-330	MYADML2
m6A-circCAMLG	miR-330	RPL3
m6A-circCAMLG	miR-330	C3orf18
m6A-circCAMLG	miR-330	CORO2B
m6A-circCAMLG	miR-330	DERL3
m6A-circCAMLG	miR-330	ITPK1
m6A-circCAMLG	miR-330	RIMS3
m6A-circCAMLG	miR-330	TMEM223
m6A-circCAMLG	miR-330	ENSSSCG00000010359
m6A-circCAMLG	miR-330	HLX
m6A-circCAMLG	miR-330	TNK2
m6A-circCAMLG	miR-330	TMEM8B
m6A-circCAMLG	miR-330	TRPV2
m6A-circCAMLG	miR-330	ILK
m6A-circCAMLG	miR-330	DLX1
m6A-circCAMLG	miR-330	GRN
m6A-circCAMLG	miR-330	USP19
m6A-circCAMLG	miR-330	EML2
m6A-circCAMLG	miR-330	IFT122
m6A-circCAMLG	miR-330	TEDC1
m6A-circCAMLG	miR-330	C14orf93
m6A-circCAMLG	miR-330	INPP5D
m6A-circCAMLG	miR-330	NOTUM
m6A-circCAMLG	miR-330	CCDC69
m6A-circCAMLG	miR-330	EPS8L2
m6A-circCAMLG	miR-330	TTC39A
m6A-circCAMLG	miR-330	TCF3
m6A-circCAMLG	miR-330	BAX
m6A-circCAMLG	miR-330	CCDC93
m6A-circCAMLG	miR-330	ENTR1
m6A-circCAMLG	miR-330	ACTN4
m6A-circCAMLG	miR-330	GRIPAP1
m6A-circCAMLG	miR-330	CLIC5
m6A-circCAMLG	miR-330	GRK6
m6A-circCAMLG	miR-330	CCDC85C
m6A-circCAMLG	miR-330	AGFG2
m6A-circCAMLG	miR-330	NCSTN
m6A-circCAMLG	miR-330	MED15
m6A-circCAMLG	miR-330	SF3A1
m6A-circCAMLG	miR-330	RAPGEF6
m6A-circCAMLG	miR-330	ARHGEF2
m6A-circCAMLG	miR-330	SLC44A2
m6A-circCAMLG	miR-330	HNF4A
m6A-circCAMLG	miR-330	TTC38
m6A-circCAMLG	miR-330	NUP98
m6A-circCAMLG	miR-330	ADRM1
m6A-circCAMLG	miR-330	ACVRL1
m6A-circCAMLG	miR-330	SLC28A1
m6A-circCAMLG	miR-330	TIRAP
m6A-circCAMLG	miR-330	MAPKAPK3
m6A-circCAMLG	miR-330	ENSSSCG00000000075
m6A-circCAMLG	miR-330	ULK3
m6A-circCAMLG	miR-330	DNAJC18
m6A-circCAMLG	miR-330	SLAMF1
m6A-circCAMLG	miR-330	CIC
m6A-circCAMLG	miR-330	CTIF
m6A-circCAMLG	miR-330	ENSSSCG00000023569
m6A-circCAMLG	miR-330	RALGPS1
m6A-circCAMLG	miR-330	ST3GAL4
m6A-circCAMLG	miR-330	ENSSSCG00000027916
m6A-circCAMLG	miR-330	ENSSSCG00000033594
m6A-circCAMLG	miR-330	SORCS2
m6A-circCAMLG	miR-330	DIS3L2
m6A-circCAMLG	miR-330	ROM1
m6A-circCAMLG	miR-330	UROC1
m6A-circCAMLG	miR-330	PLCH2
m6A-circCAMLG	miR-330	TOM1
m6A-circCAMLG	miR-330	ABCG1
m6A-circCAMLG	miR-330	MEGF6
m6A-circCAMLG	miR-330	ARPC1B
m6A-circCAMLG	miR-330	DRD2
m6A-circCAMLG	miR-330	ENSSSCG00000033623
m6A-circCAMLG	miR-330	YKT6
m6A-circCAMLG	miR-330	ENSSSCG00000035307
m6A-circCAMLG	miR-330	CYP4A24
m6A-circCAMLG	miR-330	P3H1
m6A-circCAMLG	miR-330	SERHL2
m6A-circCAMLG	miR-330	TDRD10
m6A-circCAMLG	miR-330	TNNC2
m6A-circCAMLG	miR-330	ISY1
m6A-circCAMLG	miR-330	C1QTNF2
m6A-circCAMLG	miR-330	CCT7
m6A-circCAMLG	miR-330	KLF12
m6A-circCAMLG	miR-330	SLC25A34
m6A-circCAMLG	miR-330	TMEM11
m6A-circCAMLG	miR-330	STRADA
m6A-circCAMLG	miR-330	CLIC3
m6A-circCAMLG	miR-330	STMN4
m6A-circCAMLG	miR-330	HID1
m6A-circCAMLG	miR-330	PRPF6
m6A-circCAMLG	miR-330	ELOVL1
m6A-circCAMLG	miR-330	DTYMK
m6A-circCAMLG	miR-330	LTBR
m6A-circCAMLG	miR-330	OBSL1
m6A-circCAMLG	miR-330	AP3S2
m6A-circCAMLG	miR-330	KDM4C
m6A-circCAMLG	miR-330	SH3RF3
m6A-circCAMLG	miR-330	BRMS1
m6A-circCAMLG	miR-330	GFUS
m6A-circCAMLG	miR-330	ZGRF1
m6A-circCAMLG	miR-330	EPN2
m6A-circCAMLG	miR-330	KLHL11
m6A-circCAMLG	miR-330	HGS
m6A-circCAMLG	miR-330	DOCK6
m6A-circCAMLG	miR-330	C12orf43
m6A-circCAMLG	miR-330	PLA2G2F
m6A-circCAMLG	miR-330	SDC3
m6A-circCAMLG	miR-330	SLC16A5
m6A-circCAMLG	miR-330	HRH3
m6A-circCAMLG	miR-330	ENSSSCG00000052916
m6A-circCAMLG	miR-330	PARVA
m6A-circCAMLG	miR-330	TJAP1
m6A-circCAMLG	miR-330	ZC3H10
m6A-circCAMLG	miR-330	PCCA
m6A-circCAMLG	miR-330	SLC2A4RG
m6A-circCAMLG	miR-330	CACNG5
m6A-circCAMLG	miR-330	ENSSSCG00000043116
m6A-circCAMLG	miR-330	AIMP2
m6A-circCAMLG	miR-330	FLRT1
m6A-circCAMLG	miR-330	NISCH
m6A-circCAMLG	miR-330	BRF1
m6A-circCAMLG	miR-330	ARFIP2
m6A-circCAMLG	miR-330	GPR35
m6A-circCAMLG	miR-330	FBLIM1
m6A-circCAMLG	miR-330	VASH1
m6A-circCAMLG	miR-330	GDPD5
m6A-circCAMLG	miR-330	DMP1
m6A-circCAMLG	miR-330	NCAN
m6A-circCAMLG	miR-330	CA5A
m6A-circCAMLG	miR-330	GFAP
m6A-circCAMLG	miR-330	PQBP1
m6A-circCAMLG	miR-330	RPN1
m6A-circCAMLG	miR-330	RIPOR1
m6A-circCAMLG	miR-330	NLE1
m6A-circCAMLG	miR-330	MAB21L3
m6A-circCAMLG	miR-330	ENSSSCG00000040885
m6A-circCAMLG	miR-330	TMEM177
m6A-circCAMLG	miR-330	LSS
m6A-circCAMLG	miR-330	FSTL3
m6A-circCAMLG	miR-330	MED24
m6A-circCAMLG	miR-330	NCKAP1L
m6A-circCAMLG	miR-330	GPT2
m6A-circCAMLG	miR-330	ELOVL7
m6A-circCAMLG	miR-330	RALGAPA2
m6A-circCAMLG	miR-330	ARPC1A
m6A-circCAMLG	miR-330	KATNIP
m6A-circCAMLG	miR-330	ADGRG5
m6A-circCAMLG	miR-330	PPIL2
m6A-circCAMLG	miR-330	FOXRED2
m6A-circCAMLG	miR-330	TBCE
m6A-circCAMLG	miR-330	DLGAP4
m6A-circCAMLG	miR-330	NUCB1
m6A-circCAMLG	miR-330	ZBED1
m6A-circCAMLG	miR-330	TBC1D13
m6A-circCAMLG	miR-330	CDHR5
m6A-circCAMLG	miR-330	RBM22
m6A-circCAMLG	miR-330	ENSSSCG00000027890
m6A-circCAMLG	miR-330	ENSSSCG00000016284
m6A-circCAMLG	miR-330	DBF4B
m6A-circCAMLG	miR-330	TPM2
m6A-circCAMLG	miR-330	ZNF335
m6A-circCAMLG	miR-330	ELMO2
m6A-circCAMLG	miR-330	ENSSSCG00000035960
m6A-circCAMLG	miR-330	SMARCB1
m6A-circCAMLG	miR-330	MMP24
m6A-circCAMLG	miR-330	NCAPG2
m6A-circCAMLG	miR-330	REEP1
m6A-circCAMLG	miR-330	UGT2B31
m6A-circCAMLG	miR-330	ENSSSCG00000006556
m6A-circCAMLG	miR-330	SLC17A5
m6A-circCAMLG	miR-330	ANO9
m6A-circCAMLG	miR-330	RUVBL2
m6A-circCAMLG	miR-330	KRT7
m6A-circCAMLG	miR-330	FADS3
m6A-circCAMLG	miR-330	FAM167A
m6A-circCAMLG	miR-330	KCNQ1
m6A-circCAMLG	miR-330	GAL3ST2
m6A-circCAMLG	miR-330	TMEM132C
m6A-circCAMLG	miR-330	MRTO4
m6A-circCAMLG	miR-330	CARS2
m6A-circCAMLG	miR-330	COL6A3
m6A-circCAMLG	miR-330	EVL
m6A-circCAMLG	miR-330	LSP1
m6A-circCAMLG	miR-330	PARP16
m6A-circCAMLG	miR-330	COLCA2
m6A-circCAMLG	miR-330	KANK4
m6A-circCAMLG	miR-330	RAI1
m6A-circCAMLG	miR-330	ABLIM2
m6A-circCAMLG	miR-330	BABAM2
m6A-circCAMLG	miR-330	VIPR2
m6A-circCAMLG	miR-330	KLF2
m6A-circCAMLG	miR-330	FAM163A
m6A-circCAMLG	miR-330	RALY
m6A-circCAMLG	miR-330	MED20
m6A-circCAMLG	miR-330	ITGB2
m6A-circCAMLG	miR-330	BCAR1
m6A-circCAMLG	miR-330	DIP2A
m6A-circCAMLG	miR-330	RAB11FIP3
m6A-circCAMLG	miR-330	CCDC134
m6A-circCAMLG	miR-330	TMEM52
m6A-circCAMLG	miR-330	NIBAN2
m6A-circCAMLG	miR-330	ATG13
m6A-circCAMLG	miR-330	EPS15L1
m6A-circCAMLG	miR-330	GATAD1
m6A-circCAMLG	miR-330	GBGT1
m6A-circCAMLG	miR-330	SEMA7A
m6A-circCAMLG	miR-330	CBLC
m6A-circCAMLG	miR-330	LYRM9
m6A-circCAMLG	miR-330	ENSSSCG00000033946
m6A-circCAMLG	miR-330	EIF4A1
m6A-circCAMLG	miR-330	CRTAM
m6A-circCAMLG	miR-330	MYBBP1A
m6A-circCAMLG	miR-330	FURIN
m6A-circCAMLG	miR-330	TXNRD2
m6A-circCAMLG	miR-330	RELL2
m6A-circCAMLG	miR-330	PRKCSH
m6A-circCAMLG	miR-330	KCNQ2
m6A-circCAMLG	miR-330	CD8A
m6A-circCAMLG	miR-330	SCAMP2
m6A-circCAMLG	miR-330	DPP7
m6A-circCAMLG	miR-330	PPFIBP2
m6A-circCAMLG	miR-330	BCL2L1
m6A-circCAMLG	miR-330	ENSSSCG00000013052
m6A-circCAMLG	miR-330	PRPF4B
m6A-circCAMLG	miR-330	VSTM4
m6A-circCAMLG	miR-330	IPO9
m6A-circCAMLG	miR-330	PHB2
m6A-circCAMLG	miR-330	CELSR1
m6A-circCAMLG	miR-330	SRRM2
m6A-circCAMLG	miR-330	MVB12B
m6A-circCAMLG	miR-330	G6PD
m6A-circCAMLG	miR-330	BICDL2
m6A-circCAMLG	miR-330	ETFA
m6A-circCAMLG	miR-330	TLN1
m6A-circCAMLG	miR-330	DSG2
m6A-circCAMLG	miR-330	ATXN1
m6A-circCAMLG	miR-330	DRGX
m6A-circCAMLG	miR-330	PITPNM3
m6A-circCAMLG	miR-330	ENSSSCG00000033720
m6A-circCAMLG	miR-330	MCAT
m6A-circCAMLG	miR-330	NTF3
m6A-circCAMLG	miR-330	PKP3
m6A-circCAMLG	miR-330	TNFRSF13C
m6A-circCAMLG	miR-330	SYNE3
m6A-circCAMLG	miR-330	KCNAB2
m6A-circCAMLG	miR-330	RHBDD2
m6A-circCAMLG	miR-330	NYNRIN
m6A-circCAMLG	miR-330	MTG2
m6A-circCAMLG	miR-330	PTK2B
m6A-circCAMLG	miR-330	NUMA1
m6A-circCAMLG	miR-330	ENSSSCG00000039656
m6A-circCAMLG	miR-330	CTNS
m6A-circCAMLG	miR-330	IDUA
m6A-circCAMLG	miR-330	ENSSSCG00000016330
m6A-circCAMLG	miR-330	DHX30
m6A-circCAMLG	miR-330	FBLN5
m6A-circCAMLG	miR-330	UAP1L1
m6A-circCAMLG	miR-330	BPI
m6A-circCAMLG	miR-330	SERGEF
m6A-circCAMLG	miR-330	DGCR2
m6A-circCAMLG	miR-330	PSKH1
m6A-circCAMLG	miR-330	NDST2
m6A-circCAMLG	miR-330	ENSSSCG00000021560
m6A-circCAMLG	miR-330	CASKIN2
m6A-circCAMLG	miR-330	TMEM72
m6A-circCAMLG	miR-330	DENND6B
m6A-circCAMLG	miR-330	ENSSSCG00000038852
m6A-circCAMLG	miR-330	THAP3
m6A-circCAMLG	miR-330	EMC10
m6A-circCAMLG	miR-330	CLBA1
m6A-circCAMLG	miR-330	CSK
m6A-circCAMLG	miR-330	OLFML2A
m6A-circCAMLG	miR-330	SLC2A6
m6A-circCAMLG	miR-330	SF3A2
m6A-circCAMLG	miR-330	TMEM63A
m6A-circCAMLG	miR-330	AXIN1
m6A-circCAMLG	miR-330	LZTS3
m6A-circCAMLG	miR-330	INPP5A
m6A-circCAMLG	miR-330	CCDC149
m6A-circCAMLG	miR-330	DHDDS
m6A-circCAMLG	miR-330	ENSSSCG00000031117
m6A-circCAMLG	miR-330	ENSSSCG00000032330
m6A-circCAMLG	miR-330	GIPC1
m6A-circCAMLG	miR-330	GPR137
m6A-circCAMLG	miR-330	ANKS3
m6A-circCAMLG	miR-330	SHISA5
m6A-circCAMLG	miR-330	CADM3
m6A-circCAMLG	miR-330	RAB7A
m6A-circCAMLG	miR-330	ENSSSCG00000056714
m6A-circCAMLG	miR-330	TAOK2
m6A-circCAMLG	miR-330	SOCS3
m6A-circCAMLG	miR-330	ENSSSCG00000033363
m6A-circCAMLG	miR-330	NASP
m6A-circCAMLG	miR-330	EFEMP2
m6A-circCAMLG	miR-330	LRCH4
m6A-circCAMLG	miR-330	TRIM56
m6A-circCAMLG	miR-330	RNF166
m6A-circCAMLG	miR-330	NRAP
m6A-circCAMLG	miR-330	SNAP47
m6A-circCAMLG	miR-330	KRT8
m6A-circCAMLG	miR-330	RTEL1
m6A-circCAMLG	miR-330	NRBP1
m6A-circCAMLG	miR-330	BOK
m6A-circCAMLG	miR-330	PLEKHO2
m6A-circCAMLG	miR-330	SLC7A9
m6A-circCAMLG	miR-330	AMIGO1
m6A-circCAMLG	miR-330	ANO8
m6A-circCAMLG	miR-330	ADAMTSL1
m6A-circCAMLG	miR-330	DPP9
m6A-circCAMLG	miR-330	CARHSP1
m6A-circCAMLG	miR-330	NUDCD3
m6A-circCAMLG	miR-330	TRIM29
m6A-circCAMLG	miR-330	ENSSSCG00000032135
m6A-circCAMLG	miR-330	BAIAP2
m6A-circCAMLG	miR-330	FKRP
m6A-circCAMLG	miR-330	B9D1
m6A-circCAMLG	miR-330	TRPM2
m6A-circCAMLG	miR-330	IL2RB
m6A-circCAMLG	miR-330	TBC1D20
m6A-circCAMLG	miR-330	NMB
m6A-circCAMLG	miR-330	DAGLA
m6A-circCAMLG	miR-330	ZNF512B
m6A-circCAMLG	miR-330	CDCA4
m6A-circCAMLG	miR-330	LIMK1
m6A-circCAMLG	miR-330	NF2
m6A-circCAMLG	miR-330	NRF1
m6A-circCAMLG	miR-330	RNF130
m6A-circCAMLG	miR-330	ENSSSCG00000038679
m6A-circCAMLG	miR-330	TRAPPC10
m6A-circCAMLG	miR-330	RPS6KA1
m6A-circCAMLG	miR-330	IFITM10
m6A-circCAMLG	miR-330	SPECC1L
m6A-circCAMLG	miR-330	SURF4
m6A-circCAMLG	miR-330	ZDHHC3
m6A-circCAMLG	miR-330	PHYHD1
m6A-circCAMLG	miR-330	METTL27
m6A-circCAMLG	miR-330	B3GNT7
m6A-circCAMLG	miR-330	HCRTR1
m6A-circCAMLG	miR-330	FCGRT
m6A-circCAMLG	miR-330	FASTK
m6A-circCAMLG	miR-330	MRPL12
m6A-circCAMLG	miR-330	RTN4R
m6A-circCAMLG	miR-330	NR1I2
m6A-circCAMLG	miR-330	UNC5A
m6A-circCAMLG	miR-330	ENSSSCG00000024144
m6A-circCAMLG	miR-330	LMNA
m6A-circCAMLG	miR-330	UBE2O
m6A-circCAMLG	miR-330	GMEB2
m6A-circCAMLG	miR-330	WDR59
m6A-circCAMLG	miR-330	PFKFB4
m6A-circCAMLG	miR-330	NPDC1
m6A-circCAMLG	miR-330	PPFIA3
m6A-circCAMLG	miR-330	NAT8L
m6A-circCAMLG	miR-330	CFAP410
m6A-circCAMLG	miR-330	SUV39H1
m6A-circCAMLG	miR-330	DOC2A
m6A-circCAMLG	miR-330	AUP1
m6A-circCAMLG	miR-330	HTRA2
m6A-circCAMLG	miR-330	UCKL1
m6A-circCAMLG	miR-330	ECE2
m6A-circCAMLG	miR-330	RPL27A
m6A-circCAMLG	miR-330	FAM3A
m6A-circCAMLG	miR-330	PLPPR3
m6A-circCAMLG	miR-330	TMEM147
m6A-circCAMLG	miR-330	DNAJB2
m6A-circCAMLG	miR-330	DNLZ
m6A-circCAMLG	miR-330	RIOK1
m6A-circCAMLG	miR-330	ASCL2
m6A-circCAMLG	miR-330	EPS8L3
m6A-circCAMLG	miR-330	TMEM201
m6A-circCAMLG	miR-330	MIEF2
m6A-circCAMLG	miR-330	HDAC3
m6A-circCAMLG	miR-330	SYNDIG1
m6A-circCAMLG	miR-330	RGS10
m6A-circCAMLG	miR-330	TAS1R3
m6A-circCAMLG	miR-330	RIC3
m6A-circCAMLG	miR-330	B4GALT7
m6A-circCAMLG	miR-330	ITGA11
m6A-circCAMLG	miR-330	ENSSSCG00000013760
m6A-circCAMLG	miR-330	SMPDL3B
m6A-circCAMLG	miR-330	SPOUT1
m6A-circCAMLG	miR-330	STMN3
m6A-circCAMLG	miR-330	ENSSSCG00000062259
m6A-circCAMLG	miR-330	STIP1
m6A-circCAMLG	miR-330	MFGE8
m6A-circCAMLG	miR-330	GTF3C2
m6A-circCAMLG	miR-330	VASN
m6A-circCAMLG	miR-330	CLN6
m6A-circCAMLG	miR-330	TALDO1
m6A-circCAMLG	miR-330	TBL2
m6A-circCAMLG	miR-330	GTF2F2
m6A-circCAMLG	miR-330	TM6SF2
m6A-circCAMLG	miR-330	CDC34
m6A-circCAMLG	miR-330	IKBKG
m6A-circCAMLG	miR-330	ALKBH5
m6A-circCAMLG	miR-330	MAP2K3
m6A-circCAMLG	miR-330	NLRP6
m6A-circCAMLG	miR-330	CLYBL
m6A-circCAMLG	miR-330	GPR4
m6A-circCAMLG	miR-330	SLC26A1
m6A-circCAMLG	miR-330	MGST2
m6A-circCAMLG	miR-330	C19orf47
m6A-circCAMLG	miR-330	SAMD12
m6A-circCAMLG	miR-330	DGKZ
m6A-circCAMLG	miR-330	POLR3H
m6A-circCAMLG	miR-330	HGFAC
m6A-circCAMLG	miR-330	ENSSSCG00000040253
m6A-circCAMLG	miR-330	HS1BP3
m6A-circCAMLG	miR-330	MLLT6
m6A-circCAMLG	miR-330	SEC14L2
m6A-circCAMLG	miR-330	PDK2
m6A-circCAMLG	miR-330	MYO1D
m6A-circCAMLG	miR-330	SLC38A10
m6A-circCAMLG	miR-330	YTHDF1
[truncated: 1,067 more rows]
