# Supplementary material for: Expression Profile and Regulatory Properties of m6A-Modified circRNAs in the Longissimus Dorsi of Queshan Black and Large White Pigs
Source: Animals (Basel). 2023 Jul 4;13(13):2190. doi: 10.3390/ani13132190 (PMC10339870; doi:10.3390/ani13132190)
Supplement: Supplementary file 1 [file animals-13-02190-s001.zip › Supplementary Files/Table S2. List of m6A-circCTIF related ceRNA regulatory networks.xlsx]

## Sheet: Sheet1
m6A-circRNA name	miRNA	gene name
m6A-circCTIF	miR-4335	-
m6A-circCTIF	miR-204	PLEKHG6
m6A-circCTIF	miR-204	HOXD8
m6A-circCTIF	miR-204	KLK12
m6A-circCTIF	miR-204	ALDOB
m6A-circCTIF	miR-204	LZTR1
m6A-circCTIF	miR-204	ST3GAL3
m6A-circCTIF	miR-204	RRAD
m6A-circCTIF	miR-204	ENSSSCG00000035224
m6A-circCTIF	miR-204	LRRC75A
m6A-circCTIF	miR-204	ATXN7L1
m6A-circCTIF	miR-204	ENSSSCG00000032855
m6A-circCTIF	miR-204	MYORG
m6A-circCTIF	miR-204	ZNF827
m6A-circCTIF	miR-204	PHF19
m6A-circCTIF	miR-204	STMN4
m6A-circCTIF	miR-204	SLC2A4RG
m6A-circCTIF	miR-204	VASH1
m6A-circCTIF	miR-204	RARG
m6A-circCTIF	miR-204	ENSSSCG00000013788
m6A-circCTIF	miR-204	ENSSSCG00000040498
m6A-circCTIF	miR-204	ENSSSCG00000033909
m6A-circCTIF	miR-204	MARK4
m6A-circCTIF	miR-204	TFAP2B
m6A-circCTIF	miR-204	CRYGN
m6A-circCTIF	miR-204	BABAM2
m6A-circCTIF	miR-204	CBLC
m6A-circCTIF	miR-204	TTC31
m6A-circCTIF	miR-204	LMBR1L
m6A-circCTIF	miR-204	CASP7
m6A-circCTIF	miR-204	DGAT1
m6A-circCTIF	miR-204	B4GALT1
m6A-circCTIF	miR-204	NBEAL2
m6A-circCTIF	miR-204	NAA20
m6A-circCTIF	miR-204	TCTN2
m6A-circCTIF	miR-204	FFAR4
m6A-circCTIF	miR-204	EFEMP2
m6A-circCTIF	miR-204	MSTO1
m6A-circCTIF	miR-204	ENSSSCG00000036109
m6A-circCTIF	miR-204	FAM3B
m6A-circCTIF	miR-204	SERHL2
m6A-circCTIF	miR-204	CALHM6
m6A-circCTIF	miR-204	CLUH
m6A-circCTIF	miR-204	PPARGC1A
m6A-circCTIF	miR-204	ARRDC5
m6A-circCTIF	miR-204	TAC4
m6A-circCTIF	miR-204	POGZ
m6A-circCTIF	miR-204	ENSSSCG00000031581
m6A-circCTIF	miR-204	ZDHHC3
m6A-circCTIF	miR-204	PROM2
m6A-circCTIF	miR-204	PTX4
m6A-circCTIF	miR-204	AGAP2
m6A-circCTIF	miR-204	ENSSSCG00000040135
m6A-circCTIF	miR-204	SFRP4
m6A-circCTIF	miR-204	TLE5
m6A-circCTIF	miR-204	NTAN1
m6A-circCTIF	miR-204	UNC13D
m6A-circCTIF	miR-204	SLC5A5
m6A-circCTIF	miR-204	POLR2I
m6A-circCTIF	miR-204	PRKACA
m6A-circCTIF	miR-204	ENSSSCG00000055794
m6A-circCTIF	miR-204	ASB13
m6A-circCTIF	miR-204	CCDC22
m6A-circCTIF	miR-204	STAT1
m6A-circCTIF	miR-204	SLC8B1
m6A-circCTIF	miR-204	MRPS33
m6A-circCTIF	miR-204	TMEM255B
m6A-circCTIF	miR-204	ENSSSCG00000061743
m6A-circCTIF	miR-204	COL6A1
m6A-circCTIF	miR-204	MEF2B
m6A-circCTIF	miR-204	CNTNAP1
m6A-circCTIF	miR-204	RNF167
m6A-circCTIF	miR-204	ENSSSCG00000043631
m6A-circCTIF	miR-204	KIF5C
m6A-circCTIF	miR-204	CARMIL2
m6A-circCTIF	miR-204	RHOD
m6A-circCTIF	miR-204	GLYAT
m6A-circCTIF	miR-204	ZFR2
m6A-circCTIF	miR-204	NES
m6A-circCTIF	miR-204	GDF5
m6A-circCTIF	miR-204	TRIM55
m6A-circCTIF	miR-204	ATOH8
m6A-circCTIF	miR-204	ACTN2
m6A-circCTIF	miR-204	DUSP7
m6A-circCTIF	miR-204	CAMK1
m6A-circCTIF	miR-204	SLC35C1
m6A-circCTIF	miR-204	TNPO2
m6A-circCTIF	miR-204	EPHB6
m6A-circCTIF	miR-204	ADCK2
m6A-circCTIF	miR-204	NSG2
m6A-circCTIF	miR-204	HOXC5
m6A-circCTIF	miR-204	JADE2
m6A-circCTIF	miR-204	ENSSSCG00000040118
m6A-circCTIF	miR-204	SLC43A1
m6A-circCTIF	miR-204	ACVR1B
m6A-circCTIF	miR-204	ECI2
m6A-circCTIF	miR-204	ENSSSCG00000001979
m6A-circCTIF	miR-204	MARVELD3
m6A-circCTIF	miR-204	GINS3
m6A-circCTIF	miR-204	MAG
m6A-circCTIF	miR-204	FAM167B
m6A-circCTIF	miR-204	EXOSC2
m6A-circCTIF	miR-204	DAP3
m6A-circCTIF	miR-204	RAB13
m6A-circCTIF	miR-204	NPR1
m6A-circCTIF	miR-204	ENSSSCG00000006996
m6A-circCTIF	miR-204	CHMP4B
m6A-circCTIF	miR-204	ZNF629
m6A-circCTIF	miR-204	TBC1D10B
m6A-circCTIF	miR-204	ZNF48
m6A-circCTIF	miR-210	PCP4
m6A-circCTIF	miR-210	RASSF7
m6A-circCTIF	miR-210	GCKR
m6A-circCTIF	miR-210	ARHGAP1
m6A-circCTIF	miR-210	ELMO2
m6A-circCTIF	miR-210	TSC2
m6A-circCTIF	miR-210	IPO9
m6A-circCTIF	miR-210	SLC26A6
m6A-circCTIF	miR-210	GOLGA3
m6A-circCTIF	miR-210	VAPB
m6A-circCTIF	miR-210	THAP3
m6A-circCTIF	miR-210	UNC45A
m6A-circCTIF	miR-210	ENSSSCG00000055147
m6A-circCTIF	miR-210	CLUH
m6A-circCTIF	miR-210	ENSSSCG00000036892
m6A-circCTIF	miR-210	HMGCL
m6A-circCTIF	miR-210	POLA1
m6A-circCTIF	miR-210	MTURN
m6A-circCTIF	miR-210	SGIP1
m6A-circCTIF	miR-210	TCIM
m6A-circCTIF	miR-210	ENSSSCG00000016365
m6A-circCTIF	miR-210	ACAT2
m6A-circCTIF	miR-210	PTK6
m6A-circCTIF	miR-210	IKBKG
m6A-circCTIF	miR-210	SMAP2
m6A-circCTIF	miR-210	SLC34A1
m6A-circCTIF	miR-210	OTOP3
m6A-circCTIF	miR-210	CAMKK1
m6A-circCTIF	miR-210	FAM118A
m6A-circCTIF	miR-210	ACD
m6A-circCTIF	miR-210	ENSSSCG00000021815
m6A-circCTIF	miR-210	FOXP3
m6A-circCTIF	miR-210	HMX2
m6A-circCTIF	miR-210	NDUFV1
m6A-circCTIF	miR-210	CBARP
m6A-circCTIF	miR-210	ICAM5
m6A-circCTIF	miR-210	GABARAPL1
m6A-circCTIF	miR-210	LENG1
m6A-circCTIF	miR-210	TUBB1
m6A-circCTIF	miR-210	TMEM184A
m6A-circCTIF	miR-210	PPL
m6A-circCTIF	miR-210	PTCD3
m6A-circCTIF	miR-338	LSS
m6A-circCTIF	miR-338	SULF2
m6A-circCTIF	miR-338	PNPO
m6A-circCTIF	miR-338	ADAMTSL3
m6A-circCTIF	miR-338	NIBAN1
m6A-circCTIF	miR-338	GTPBP3
m6A-circCTIF	miR-338	C5orf49
m6A-circCTIF	miR-338	SRP68
m6A-circCTIF	miR-338	TBC1D1
m6A-circCTIF	miR-338	LAP3
m6A-circCTIF	miR-338	SLC35B4
m6A-circCTIF	miR-338	JOSD1
m6A-circCTIF	miR-338	RNASE12
m6A-circCTIF	miR-338	ZC3H12D
m6A-circCTIF	miR-338	TESK1
m6A-circCTIF	miR-338	ST6GAL2
m6A-circCTIF	miR-7138-5p	PORCN
m6A-circCTIF	miR-7138-5p	POR
m6A-circCTIF	miR-7138-5p	AIFM3
m6A-circCTIF	miR-7138-5p	NUP188
m6A-circCTIF	miR-7138-5p	A4GALT
m6A-circCTIF	miR-7138-5p	FXR2
m6A-circCTIF	miR-7138-5p	RPS6KA4
m6A-circCTIF	miR-7138-5p	MOV10
m6A-circCTIF	miR-7138-5p	ENSSSCG00000039825
m6A-circCTIF	miR-7138-5p	CA12
m6A-circCTIF	miR-7138-5p	AANAT
m6A-circCTIF	miR-7138-5p	RRAD
m6A-circCTIF	miR-7138-5p	CACNG6
m6A-circCTIF	miR-7138-5p	TCF3
m6A-circCTIF	miR-7138-5p	CCDC93
m6A-circCTIF	miR-7138-5p	MRPS12
m6A-circCTIF	miR-7138-5p	RAP1GAP
m6A-circCTIF	miR-7138-5p	WNT7A
m6A-circCTIF	miR-7138-5p	AGRN
m6A-circCTIF	miR-7138-5p	PTPA
m6A-circCTIF	miR-7138-5p	KYAT3
m6A-circCTIF	miR-7138-5p	ZCWPW1
m6A-circCTIF	miR-7138-5p	KIAA1755
m6A-circCTIF	miR-7138-5p	ENSSSCG00000037377
m6A-circCTIF	miR-7138-5p	PHF13
m6A-circCTIF	miR-7138-5p	ENSSSCG00000006694
m6A-circCTIF	miR-7138-5p	ZNF445
m6A-circCTIF	miR-7138-5p	ARHGEF7
m6A-circCTIF	miR-7138-5p	PARS2
m6A-circCTIF	miR-7138-5p	ZNF205
m6A-circCTIF	miR-7138-5p	SREBF2
m6A-circCTIF	miR-7138-5p	GPR35
m6A-circCTIF	miR-7138-5p	ARHGEF25
m6A-circCTIF	miR-7138-5p	GJB3
m6A-circCTIF	miR-7138-5p	SIDT2
m6A-circCTIF	miR-7138-5p	JDP2
m6A-circCTIF	miR-7138-5p	MARK4
m6A-circCTIF	miR-7138-5p	RNF126
m6A-circCTIF	miR-7138-5p	PUS1
m6A-circCTIF	miR-7138-5p	CRYGN
m6A-circCTIF	miR-7138-5p	NIBAN2
m6A-circCTIF	miR-7138-5p	ATG13
m6A-circCTIF	miR-7138-5p	VPS37C
m6A-circCTIF	miR-7138-5p	PODN
m6A-circCTIF	miR-7138-5p	ATXN1
m6A-circCTIF	miR-7138-5p	PRPF31
m6A-circCTIF	miR-7138-5p	ELMOD3
m6A-circCTIF	miR-7138-5p	ARFRP1
m6A-circCTIF	miR-7138-5p	C4orf36
m6A-circCTIF	miR-7138-5p	PGAP2
m6A-circCTIF	miR-7138-5p	APP
m6A-circCTIF	miR-7138-5p	DECR2
m6A-circCTIF	miR-7138-5p	GIPC1
m6A-circCTIF	miR-7138-5p	ST6GALNAC4
m6A-circCTIF	miR-7138-5p	CWC25
m6A-circCTIF	miR-7138-5p	SMYD5
m6A-circCTIF	miR-7138-5p	NASP
m6A-circCTIF	miR-7138-5p	FAM234A
m6A-circCTIF	miR-7138-5p	CASTOR1
m6A-circCTIF	miR-7138-5p	AMIGO1
m6A-circCTIF	miR-7138-5p	KANSL3
m6A-circCTIF	miR-7138-5p	ARL3
m6A-circCTIF	miR-7138-5p	RASSF1
m6A-circCTIF	miR-7138-5p	SCLY
m6A-circCTIF	miR-7138-5p	ARVCF
m6A-circCTIF	miR-7138-5p	SENP3
m6A-circCTIF	miR-7138-5p	MRPL12
m6A-circCTIF	miR-7138-5p	NPDC1
m6A-circCTIF	miR-7138-5p	MARK2
m6A-circCTIF	miR-7138-5p	SPOCK2
m6A-circCTIF	miR-7138-5p	UCKL1
m6A-circCTIF	miR-7138-5p	D2HGDH
m6A-circCTIF	miR-7138-5p	GJA4
m6A-circCTIF	miR-7138-5p	CDC42EP2
m6A-circCTIF	miR-7138-5p	KLK8
m6A-circCTIF	miR-7138-5p	KCTD2
m6A-circCTIF	miR-7138-5p	MMP9
m6A-circCTIF	miR-7138-5p	NDOR1
m6A-circCTIF	miR-7138-5p	KCTD15
m6A-circCTIF	miR-7138-5p	RAI1
m6A-circCTIF	miR-7138-5p	PAX7
m6A-circCTIF	miR-7138-5p	ENSSSCG00000004573
m6A-circCTIF	miR-7138-5p	GPD1
m6A-circCTIF	miR-7138-5p	DEDD
m6A-circCTIF	miR-7138-5p	TRAPPC6A
m6A-circCTIF	miR-7138-5p	DNASE1
m6A-circCTIF	miR-7138-5p	CHD5
m6A-circCTIF	miR-7138-5p	DCAKD
m6A-circCTIF	miR-7138-5p	ARHGAP45
m6A-circCTIF	miR-7138-5p	ENSSSCG00000031205
m6A-circCTIF	miR-7138-5p	NEU4
m6A-circCTIF	miR-7138-5p	RPL35A
m6A-circCTIF	miR-7138-5p	LDLRAD4
m6A-circCTIF	miR-7138-5p	PTK6
m6A-circCTIF	miR-7138-5p	FOXP3
m6A-circCTIF	miR-7138-5p	ENSSSCG00000005311
m6A-circCTIF	miR-7138-5p	MS4A8
m6A-circCTIF	miR-7138-5p	PECAM1
m6A-circCTIF	miR-7138-5p	PELI3
m6A-circCTIF	miR-7138-5p	PIDD1
m6A-circCTIF	miR-7138-5p	TRIM46
m6A-circCTIF	miR-7138-5p	DUSP9
m6A-circCTIF	miR-7138-5p	S100A10
m6A-circCTIF	miR-7138-5p	MCFD2
m6A-circCTIF	miR-7138-5p	CD248
m6A-circCTIF	miR-7138-5p	CDK16
m6A-circCTIF	miR-7138-5p	CLEC3B
m6A-circCTIF	miR-7138-5p	ARHGEF37
m6A-circCTIF	miR-7138-5p	KCNMA1
m6A-circCTIF	miR-7138-5p	MSRB1
m6A-circCTIF	miR-7138-5p	ZDHHC5
m6A-circCTIF	miR-7138-5p	TMEM129
m6A-circCTIF	miR-7138-5p	ASRGL1
m6A-circCTIF	miR-7138-5p	NOC2L
m6A-circCTIF	miR-7138-5p	ZNF423
m6A-circCTIF	miR-7138-5p	DPP9
m6A-circCTIF	miR-7138-5p	MMS19
m6A-circCTIF	miR-7138-5p	ENSSSCG00000007932
m6A-circCTIF	miR-7138-5p	CLDN2
m6A-circCTIF	miR-7138-5p	MMACHC
m6A-circCTIF	miR-7138-5p	FUT7
m6A-circCTIF	miR-7138-5p	TICAM1
m6A-circCTIF	miR-7138-5p	GTPBP3
m6A-circCTIF	miR-7138-5p	ASIC4
m6A-circCTIF	miR-7138-5p	HOXA10
m6A-circCTIF	miR-7138-5p	PFKFB3
m6A-circCTIF	miR-7138-5p	C5orf49
m6A-circCTIF	miR-7138-5p	SLC6A18
m6A-circCTIF	miR-7138-5p	NARF
m6A-circCTIF	miR-7138-5p	RNF157
m6A-circCTIF	miR-7138-5p	UNK
m6A-circCTIF	miR-7138-5p	ETV4
m6A-circCTIF	miR-7138-5p	PHB1
m6A-circCTIF	miR-7138-5p	ARRB2
m6A-circCTIF	miR-7138-5p	ACADVL
m6A-circCTIF	miR-7138-5p	WRAP53
m6A-circCTIF	miR-7138-5p	ENSSSCG00000018050
m6A-circCTIF	miR-7138-5p	TNFRSF1B
m6A-circCTIF	miR-7138-5p	WDR90
m6A-circCTIF	miR-7138-5p	AGAP3
m6A-circCTIF	miR-7138-5p	POLR2E
m6A-circCTIF	miR-7138-5p	UQCC1
m6A-circCTIF	miR-7138-5p	PLEKHO1
m6A-circCTIF	miR-7138-5p	TTYH1
m6A-circCTIF	miR-7138-5p	E4F1
m6A-circCTIF	miR-7138-5p	UBTD1
m6A-circCTIF	miR-7138-5p	TMPRSS6
m6A-circCTIF	miR-7138-5p	ZMIZ2
m6A-circCTIF	miR-7138-5p	HEMK1
m6A-circCTIF	miR-7138-5p	GGA1
m6A-circCTIF	miR-7138-5p	DHCR7
m6A-circCTIF	miR-7138-5p	KLF16
m6A-circCTIF	miR-7138-5p	DTX3
m6A-circCTIF	miR-7138-5p	SNF8
m6A-circCTIF	miR-7138-5p	RANGAP1
m6A-circCTIF	miR-7138-5p	NKIRAS2
m6A-circCTIF	miR-7138-5p	WIZ
m6A-circCTIF	miR-7138-5p	TMEM150C
m6A-circCTIF	miR-7138-5p	FAM83E
m6A-circCTIF	miR-7138-5p	PIK3CD
m6A-circCTIF	miR-7138-5p	INO80B
m6A-circCTIF	miR-7138-5p	TEX261
m6A-circCTIF	miR-7138-5p	ARHGAP25
m6A-circCTIF	miR-7138-5p	ENSSSCG00000008486
m6A-circCTIF	miR-7138-5p	CBY2
m6A-circCTIF	miR-7138-5p	SPECC1L
m6A-circCTIF	miR-7138-5p	GGT5
m6A-circCTIF	miR-7138-5p	TANGO2
m6A-circCTIF	miR-7138-5p	ENSSSCG00000010280
m6A-circCTIF	miR-7138-5p	MGMT
m6A-circCTIF	miR-7138-5p	STK32C
m6A-circCTIF	miR-7138-5p	PITRM1
m6A-circCTIF	miR-7138-5p	CSRNP1
m6A-circCTIF	miR-7138-5p	LHFPL4
m6A-circCTIF	miR-7138-5p	PLXND1
m6A-circCTIF	miR-7138-5p	RFC4
m6A-circCTIF	miR-7138-5p	SLC37A1
m6A-circCTIF	miR-7138-5p	PHEX
m6A-circCTIF	miR-7138-5p	CHID1
m6A-circCTIF	miR-7138-5p	SART1
m6A-circCTIF	miR-7138-5p	SIPA1
m6A-circCTIF	miR-7138-5p	RASGRP2
m6A-circCTIF	miR-7138-5p	SLC35C1
m6A-circCTIF	miR-7138-5p	UQCR11
m6A-circCTIF	miR-7138-5p	ENSSSCG00000013530
m6A-circCTIF	miR-7138-5p	RAVER1
m6A-circCTIF	miR-7138-5p	GJC2
m6A-circCTIF	miR-7138-5p	ARAP3
m6A-circCTIF	miR-7138-5p	AVPR1B
m6A-circCTIF	miR-7138-5p	CNPPD1
m6A-circCTIF	miR-7138-5p	TSPAN33
m6A-circCTIF	miR-7138-5p	ATP6V1F
m6A-circCTIF	miR-7138-5p	HIBADH
m6A-circCTIF	miR-7138-5p	ENSSSCG00000008016
m6A-circCTIF	miR-7138-5p	PARVG
m6A-circCTIF	miR-7138-5p	NELFB
m6A-circCTIF	miR-7138-5p	LUC7L
m6A-circCTIF	miR-7138-5p	CYP4B1
m6A-circCTIF	miR-7138-5p	LSP1
m6A-circCTIF	miR-7138-5p	KCTD17
m6A-circCTIF	miR-7138-5p	GABARAPL1
m6A-circCTIF	miR-7138-5p	GAPDH
m6A-circCTIF	miR-7138-5p	PEX26
m6A-circCTIF	miR-7138-5p	PPP6R2
m6A-circCTIF	miR-7138-5p	PANX2
m6A-circCTIF	miR-7138-5p	WRNIP1
m6A-circCTIF	miR-7138-5p	TFEB
m6A-circCTIF	miR-7138-5p	GUCA1A
m6A-circCTIF	miR-7138-5p	SLC29A1
m6A-circCTIF	miR-7138-5p	NFATC4
m6A-circCTIF	miR-7138-5p	RIPK3
m6A-circCTIF	miR-7138-5p	CEBPE
m6A-circCTIF	miR-7138-5p	SPTB
m6A-circCTIF	miR-7138-5p	MARVELD3
m6A-circCTIF	miR-7138-5p	KCNN4
m6A-circCTIF	miR-7138-5p	RNF207
m6A-circCTIF	miR-7138-5p	PLEKHM2
m6A-circCTIF	miR-7138-5p	FAM131C
m6A-circCTIF	miR-7138-5p	NUDC
m6A-circCTIF	miR-7138-5p	SMPD2
m6A-circCTIF	miR-7138-5p	MNS1
m6A-circCTIF	miR-7138-5p	FIBCD1
m6A-circCTIF	miR-7138-5p	FOXH1
m6A-circCTIF	miR-7138-5p	TOMM40L
m6A-circCTIF	miR-7138-5p	CASQ1
m6A-circCTIF	miR-7138-5p	SLC27A3
m6A-circCTIF	miR-7138-5p	SLC6A17
m6A-circCTIF	miR-7138-5p	DNTTIP1
m6A-circCTIF	miR-7138-5p	SNX21
m6A-circCTIF	miR-7138-5p	ZNF335
m6A-circCTIF	miR-7138-5p	NPEPL1
m6A-circCTIF	miR-7138-5p	CYP2W1
m6A-circCTIF	miR-7138-5p	FOXK1
m6A-circCTIF	miR-7138-5p	RNF40
m6A-circCTIF	miR-7138-5p	ZC3H7A
m6A-circCTIF	miR-7138-5p	USP7
m6A-circCTIF	miR-7138-5p	IGFALS
m6A-circCTIF	miR-7138-5p	SLC9A3R2
