# Supplementary material for: Expression Profile and Regulatory Properties of m6A-Modified circRNAs in the Longissimus Dorsi of Queshan Black and Large White Pigs
Source: Animals (Basel). 2023 Jul 4;13(13):2190. doi: 10.3390/ani13132190 (PMC10339870; doi:10.3390/ani13132190)
Supplement: Supplementary file 1 [file animals-13-02190-s001.zip › Supplementary Files/Table S3. List of m6A-circEGF related ceRNA regulatory networks.xlsx]

## Sheet: Sheet1
m6A-circRNA name	miRNA	gene name
m6A-circEGF	miR-9801-5p	-
m6A-circEGF	miR-670	-
m6A-circEGF	miR-148b-5p	LZTR1
m6A-circEGF	miR-148b-5p	POU2F1
m6A-circEGF	miR-148b-5p	CTNS
m6A-circEGF	miR-148b-5p	TTLL1
m6A-circEGF	miR-148b-5p	TMSB4X
m6A-circEGF	miR-148b-5p	ENSSSCG00000023603
m6A-circEGF	miR-148b-5p	FBXL7
m6A-circEGF	miR-148b-5p	RMDN3
m6A-circEGF	miR-148b-5p	ATP6V0A1
m6A-circEGF	miR-148b-5p	TUBA1B
m6A-circEGF	miR-221-3p	RABEP2
m6A-circEGF	miR-221-3p	PDE4DIP
m6A-circEGF	miR-221-3p	ENSSSCG00000007705
m6A-circEGF	miR-221-3p	VGLL4
m6A-circEGF	miR-221-3p	TERF1
m6A-circEGF	miR-221-3p	PSEN2
m6A-circEGF	miR-221-3p	PLCL2
m6A-circEGF	miR-221-3p	AZI2
m6A-circEGF	miR-221-3p	BRD8
m6A-circEGF	miR-221-3p	ADAT3
m6A-circEGF	miR-221-3p	COX17
m6A-circEGF	miR-221-3p	ENSSSCG00000039855
m6A-circEGF	miR-221-3p	EMC10
m6A-circEGF	miR-221-3p	ENSSSCG00000002036
m6A-circEGF	miR-221-3p	CHMP4B
m6A-circEGF	miR-22-5p	HAUS4
m6A-circEGF	miR-22-5p	TNNI1
m6A-circEGF	miR-22-5p	SQOR
m6A-circEGF	miR-22-5p	HECW1
m6A-circEGF	miR-22-5p	DCTN1
m6A-circEGF	miR-22-5p	LARGE1
m6A-circEGF	miR-22-5p	NBN
m6A-circEGF	miR-22-5p	FUNDC1
m6A-circEGF	miR-22-5p	AMIGO3
m6A-circEGF	miR-22-5p	GMPPB
m6A-circEGF	miR-30c-1-3p	TMEM240
m6A-circEGF	miR-30c-1-3p	GPS1
m6A-circEGF	miR-30c-1-3p	ENSSSCG00000032060
m6A-circEGF	miR-30c-1-3p	GRIP2
m6A-circEGF	miR-30c-1-3p	MRPS12
m6A-circEGF	miR-30c-1-3p	TM9SF4
m6A-circEGF	miR-30c-1-3p	OSGEP
m6A-circEGF	miR-30c-1-3p	PRR5L
m6A-circEGF	miR-30c-1-3p	ENSSSCG00000016970
m6A-circEGF	miR-30c-1-3p	NAGK
m6A-circEGF	miR-30c-1-3p	NDST1
m6A-circEGF	miR-30c-1-3p	LY6G6C
m6A-circEGF	miR-30c-1-3p	AMBRA1
m6A-circEGF	miR-30c-1-3p	NR1I3
m6A-circEGF	miR-30c-1-3p	ENSSSCG00000034853
m6A-circEGF	miR-30c-1-3p	KANK3
m6A-circEGF	miR-30c-1-3p	MYO9B
m6A-circEGF	miR-30c-1-3p	MYO1A
m6A-circEGF	miR-30c-1-3p	CAMTA2
m6A-circEGF	miR-30c-1-3p	KCNC1
m6A-circEGF	miR-30c-1-3p	SEMA4A
m6A-circEGF	miR-30c-1-3p	IQCK
m6A-circEGF	miR-30c-1-3p	TRADD
m6A-circEGF	miR-30c-1-3p	PPFIA3
m6A-circEGF	miR-30c-1-3p	UCKL1
m6A-circEGF	miR-30c-1-3p	PPM1J
m6A-circEGF	miR-30c-1-3p	SMARCC2
m6A-circEGF	miR-30c-1-3p	RCN3
m6A-circEGF	miR-30c-1-3p	DIRAS1
m6A-circEGF	miR-30c-1-3p	SPAG7
m6A-circEGF	miR-30c-1-3p	SHLD2
m6A-circEGF	miR-30c-1-3p	ACTA1
m6A-circEGF	miR-30c-1-3p	EEF1AKMT1
m6A-circEGF	miR-30c-1-3p	SLC25A42
m6A-circEGF	miR-30c-1-3p	CINP
m6A-circEGF	miR-30c-1-3p	DOCK2
m6A-circEGF	miR-30c-1-3p	LSM10
m6A-circEGF	miR-30c-1-3p	ZNF691
m6A-circEGF	miR-30c-1-3p	SNCG
m6A-circEGF	miR-30c-1-3p	F8
m6A-circEGF	miR-30c-1-3p	ENSSSCG00000012319
m6A-circEGF	miR-30c-1-3p	NR5A1
m6A-circEGF	miR-30c-1-3p	ATP6V1G2
m6A-circEGF	miR-30c-1-3p	IRF2
m6A-circEGF	miR-30c-1-3p	BCL3
m6A-circEGF	miR-30c-1-3p	CHD3
m6A-circEGF	miR-30c-1-3p	SLC39A5
m6A-circEGF	miR-30c-1-3p	WDR46
m6A-circEGF	miR-30c-1-3p	RCC1
m6A-circEGF	miR-30c-1-3p	CLDN2
m6A-circEGF	miR-30c-1-3p	TRIM47
m6A-circEGF	miR-30c-1-3p	DCAKD
m6A-circEGF	miR-30c-1-3p	COPRS
m6A-circEGF	miR-30c-1-3p	ZKSCAN7
m6A-circEGF	miR-30c-1-3p	BATF3
m6A-circEGF	miR-30c-1-3p	PFKL
m6A-circEGF	miR-30c-1-3p	LRRTM1
m6A-circEGF	miR-30c-1-3p	TFF3
m6A-circEGF	miR-30c-1-3p	COG4
m6A-circEGF	miR-30c-1-3p	EVC2
m6A-circEGF	miR-30c-1-3p	PTGIR
m6A-circEGF	miR-30c-1-3p	ENSSSCG00000025673
m6A-circEGF	miR-30c-1-3p	FHAD1
m6A-circEGF	miR-30c-1-3p	SPRP
m6A-circEGF	miR-30c-1-3p	ENSSSCG00000038404
m6A-circEGF	miR-30c-1-3p	PTPN6
m6A-circEGF	miR-30c-1-3p	HTRA3
m6A-circEGF	miR-30c-1-3p	HMBOX1
m6A-circEGF	miR-30c-1-3p	PES1
m6A-circEGF	miR-30c-1-3p	MSMB
m6A-circEGF	miR-30c-1-3p	XYLB
m6A-circEGF	miR-30c-1-3p	GHRL
m6A-circEGF	miR-30c-1-3p	RBP2
m6A-circEGF	miR-30c-1-3p	TSPYL2
m6A-circEGF	miR-30c-1-3p	PTPRCAP
m6A-circEGF	miR-30c-1-3p	FSD1
m6A-circEGF	miR-30c-1-3p	UQCRQ
m6A-circEGF	miR-30c-1-3p	C2CD2L
m6A-circEGF	miR-30c-1-3p	EPHA1
m6A-circEGF	miR-30c-1-3p	POLM
m6A-circEGF	miR-30c-1-3p	PMEL
m6A-circEGF	miR-30c-1-3p	P3H3
m6A-circEGF	miR-30c-1-3p	PIANP
m6A-circEGF	miR-30c-1-3p	B3GALT4
m6A-circEGF	miR-30c-1-3p	MLN
m6A-circEGF	miR-30c-1-3p	MOCS1
m6A-circEGF	miR-30c-1-3p	HMG20A
m6A-circEGF	miR-30c-1-3p	TMEM63C
m6A-circEGF	miR-30c-1-3p	FTL
m6A-circEGF	miR-30c-1-3p	COQ3
m6A-circEGF	miR-30c-1-3p	TRAF3IP2
m6A-circEGF	miR-30c-1-3p	CNDP1
m6A-circEGF	miR-30c-1-3p	FAM189A2
m6A-circEGF	miR-30c-1-3p	ENSSSCG00000005756
m6A-circEGF	miR-30c-1-3p	CA8
m6A-circEGF	miR-30c-1-3p	UFC1
m6A-circEGF	miR-30c-1-3p	METTL25B
m6A-circEGF	miR-30c-1-3p	ENSSSCG00000006996
m6A-circEGF	miR-30c-1-3p	BPIFB1
m6A-circEGF	miR-30c-1-3p	PHACTR3
m6A-circEGF	miR-30c-1-3p	XPO6
m6A-circEGF	miR-30c-1-3p	ENSSSCG00000008056
m6A-circEGF	miR-30c-1-3p	SEMA4C
m6A-circEGF	miR-30c-3p	GRK2
m6A-circEGF	miR-30c-3p	NCSTN
m6A-circEGF	miR-30c-3p	GPS1
m6A-circEGF	miR-30c-3p	GRIP2
m6A-circEGF	miR-30c-3p	ANGPT4
m6A-circEGF	miR-30c-3p	ST3GAL3
m6A-circEGF	miR-30c-3p	DRG2
m6A-circEGF	miR-30c-3p	PTPN23
m6A-circEGF	miR-30c-3p	SYT2
m6A-circEGF	miR-30c-3p	ZNF444
m6A-circEGF	miR-30c-3p	SEC16B
m6A-circEGF	miR-30c-3p	MRPS12
m6A-circEGF	miR-30c-3p	SETDB1
m6A-circEGF	miR-30c-3p	BRINP2
m6A-circEGF	miR-30c-3p	TM9SF4
m6A-circEGF	miR-30c-3p	OSGEP
m6A-circEGF	miR-30c-3p	PRR5L
m6A-circEGF	miR-30c-3p	ABCG1
m6A-circEGF	miR-30c-3p	ZCWPW1
m6A-circEGF	miR-30c-3p	NAGK
m6A-circEGF	miR-30c-3p	ENSSSCG00000000419
m6A-circEGF	miR-30c-3p	KCNE3
m6A-circEGF	miR-30c-3p	ZNF76
m6A-circEGF	miR-30c-3p	NDST1
m6A-circEGF	miR-30c-3p	TBC1D13
m6A-circEGF	miR-30c-3p	NBEAL2
m6A-circEGF	miR-30c-3p	VWA7
m6A-circEGF	miR-30c-3p	ENSSSCG00000037885
m6A-circEGF	miR-30c-3p	NTF3
m6A-circEGF	miR-30c-3p	KANK3
m6A-circEGF	miR-30c-3p	MYO9B
m6A-circEGF	miR-30c-3p	RHBDD2
m6A-circEGF	miR-30c-3p	KCNC1
m6A-circEGF	miR-30c-3p	SCO1
m6A-circEGF	miR-30c-3p	ENSSSCG00000044150
m6A-circEGF	miR-30c-3p	BIN1
m6A-circEGF	miR-30c-3p	TRADD
m6A-circEGF	miR-30c-3p	UCKL1
m6A-circEGF	miR-30c-3p	SETD5
m6A-circEGF	miR-30c-3p	ENSSSCG00000033385
m6A-circEGF	miR-30c-3p	RCN3
m6A-circEGF	miR-30c-3p	SP5
m6A-circEGF	miR-30c-3p	E2F3
m6A-circEGF	miR-30c-3p	LYPD1
m6A-circEGF	miR-30c-3p	TMEM54
m6A-circEGF	miR-30c-3p	TNFAIP8L2
m6A-circEGF	miR-30c-3p	AP1M1
m6A-circEGF	miR-30c-3p	SLC25A42
m6A-circEGF	miR-30c-3p	CLN3
m6A-circEGF	miR-30c-3p	EEFSEC
m6A-circEGF	miR-30c-3p	CINP
m6A-circEGF	miR-30c-3p	SERPINA6
m6A-circEGF	miR-30c-3p	LRFN4
m6A-circEGF	miR-30c-3p	DOCK2
m6A-circEGF	miR-30c-3p	LSM10
m6A-circEGF	miR-30c-3p	RPL15
m6A-circEGF	miR-30c-3p	PER1
m6A-circEGF	miR-30c-3p	ENSSSCG00000012319
m6A-circEGF	miR-30c-3p	PHACTR3
m6A-circEGF	miR-30c-3p	IRF2
m6A-circEGF	miR-30c-3p	RING1
m6A-circEGF	miR-30c-3p	FGFR4
m6A-circEGF	miR-30c-3p	SLC39A5
m6A-circEGF	miR-30c-3p	KBTBD13
m6A-circEGF	miR-30c-3p	WDR46
m6A-circEGF	miR-30c-3p	CLDN2
m6A-circEGF	miR-30c-3p	PLEKHG3
m6A-circEGF	miR-30c-3p	ENSSSCG00000050449
m6A-circEGF	miR-30c-3p	NDUFS6
m6A-circEGF	miR-30c-3p	FOXK2
m6A-circEGF	miR-30c-3p	GHDC
m6A-circEGF	miR-30c-3p	COPRS
m6A-circEGF	miR-30c-3p	KDM2A
m6A-circEGF	miR-30c-3p	ZKSCAN7
m6A-circEGF	miR-30c-3p	ENSSSCG00000055326
m6A-circEGF	miR-30c-3p	TRPM4
m6A-circEGF	miR-30c-3p	CDK10
m6A-circEGF	miR-30c-3p	LARS2
m6A-circEGF	miR-30c-3p	TMEM198
m6A-circEGF	miR-30c-3p	DDX49
m6A-circEGF	miR-30c-3p	TFF3
m6A-circEGF	miR-30c-3p	ENSSSCG00000022164
m6A-circEGF	miR-30c-3p	UBTD1
m6A-circEGF	miR-30c-3p	FHAD1
m6A-circEGF	miR-30c-3p	HAO1
m6A-circEGF	miR-30c-3p	FAM163B
m6A-circEGF	miR-30c-3p	KHDRBS1
m6A-circEGF	miR-30c-3p	ADAMTSL2
m6A-circEGF	miR-30c-3p	PROSER2
m6A-circEGF	miR-30c-3p	ENSSSCG00000049883
m6A-circEGF	miR-30c-3p	CCDC170
m6A-circEGF	miR-30c-3p	DNAI2
m6A-circEGF	miR-30c-3p	INHA
m6A-circEGF	miR-30c-3p	ENSSSCG00000038404
m6A-circEGF	miR-30c-3p	EIF4A1
m6A-circEGF	miR-30c-3p	TP53I3
m6A-circEGF	miR-30c-3p	BIN3
m6A-circEGF	miR-30c-3p	ABCB9
m6A-circEGF	miR-30c-3p	SF3A1
m6A-circEGF	miR-30c-3p	KLHL22
m6A-circEGF	miR-30c-3p	MSMB
m6A-circEGF	miR-30c-3p	HOGA1
m6A-circEGF	miR-30c-3p	XYLB
m6A-circEGF	miR-30c-3p	GNAI2
m6A-circEGF	miR-30c-3p	GHRL
m6A-circEGF	miR-30c-3p	RBP2
m6A-circEGF	miR-30c-3p	TSPYL2
m6A-circEGF	miR-30c-3p	PTPRCAP
m6A-circEGF	miR-30c-3p	ESRRA
m6A-circEGF	miR-30c-3p	TMEM109
m6A-circEGF	miR-30c-3p	HTR3B
m6A-circEGF	miR-30c-3p	OSMR
m6A-circEGF	miR-30c-3p	CDH5
m6A-circEGF	miR-30c-3p	NR1H2
m6A-circEGF	miR-30c-3p	PMEL
m6A-circEGF	miR-30c-3p	NEMP1
m6A-circEGF	miR-30c-3p	ENSSSCG00000052399
m6A-circEGF	miR-30c-3p	MYO1A
m6A-circEGF	miR-30c-3p	P3H3
m6A-circEGF	miR-30c-3p	POLR1H
m6A-circEGF	miR-30c-3p	SLC39A7
m6A-circEGF	miR-30c-3p	B3GALT4
m6A-circEGF	miR-30c-3p	MOCS1
m6A-circEGF	miR-30c-3p	HYKK
m6A-circEGF	miR-30c-3p	PPP1R13B
m6A-circEGF	miR-30c-3p	RABAC1
m6A-circEGF	miR-30c-3p	FTL
m6A-circEGF	miR-30c-3p	COQ3
m6A-circEGF	miR-30c-3p	CNDP1
m6A-circEGF	miR-30c-3p	PHLPP1
m6A-circEGF	miR-30c-3p	ATG14
m6A-circEGF	miR-30c-3p	ENSSSCG00000005756
m6A-circEGF	miR-30c-3p	TBX19
m6A-circEGF	miR-30c-3p	METTL25B
m6A-circEGF	miR-30c-3p	SHC1
m6A-circEGF	miR-30c-3p	HAX1
m6A-circEGF	miR-30c-3p	BPIFB1
m6A-circEGF	miR-30c-3p	CDH22
m6A-circEGF	miR-30c-3p	TSR3
m6A-circEGF	miR-30c-3p	ENSSSCG00000008056
m6A-circEGF	miR-30c-3p	SEMA4C
m6A-circEGF	miR-338	LSS
m6A-circEGF	miR-338	SULF2
m6A-circEGF	miR-338	PNPO
m6A-circEGF	miR-338	ADAMTSL3
m6A-circEGF	miR-338	NIBAN1
m6A-circEGF	miR-338	GTPBP3
m6A-circEGF	miR-338	C5orf49
m6A-circEGF	miR-338	SRP68
m6A-circEGF	miR-338	TBC1D1
m6A-circEGF	miR-338	LAP3
m6A-circEGF	miR-338	SLC35B4
m6A-circEGF	miR-338	JOSD1
m6A-circEGF	miR-338	RNASE12
m6A-circEGF	miR-338	ZC3H12D
m6A-circEGF	miR-338	TESK1
m6A-circEGF	miR-338	ST6GAL2
m6A-circEGF	miR-376a-5p	NXNL2
m6A-circEGF	miR-452	LRRC25
m6A-circEGF	miR-452	IGF2BP2
m6A-circEGF	miR-452	SMCHD1
m6A-circEGF	miR-452	TJP3
m6A-circEGF	miR-452	PRKRA
m6A-circEGF	miR-452	ENSSSCG00000001455
