# Supplementary material for: Expression Profile and Regulatory Properties of m6A-Modified circRNAs in the Longissimus Dorsi of Queshan Black and Large White Pigs
Source: Animals (Basel). 2023 Jul 4;13(13):2190. doi: 10.3390/ani13132190 (PMC10339870; doi:10.3390/ani13132190)
Supplement: Supplementary file 1 [file animals-13-02190-s001.zip › Supplementary Files/Table S4. List of m6A-circGUCY2C related ceRNA regulatory networks.xlsx]

## Sheet: Sheet1
m6A-circRNA name	miRNA	gene name
m6A-circGUCY2C	miR-425-3p	FLNC
m6A-circGUCY2C	miR-425-3p	ITPK1
m6A-circGUCY2C	miR-425-3p	TMEM223
m6A-circGUCY2C	miR-425-3p	CYB561A3
m6A-circGUCY2C	miR-425-3p	HS2ST1
m6A-circGUCY2C	miR-425-3p	NCAPG2
m6A-circGUCY2C	miR-425-3p	GID4
m6A-circGUCY2C	miR-425-3p	PPP1R7
m6A-circGUCY2C	miR-425-3p	TLDC2
m6A-circGUCY2C	miR-425-3p	TGFB1I1
m6A-circGUCY2C	miR-425-3p	CRAT
m6A-circGUCY2C	miR-425-3p	CD81
m6A-circGUCY2C	miR-425-3p	FAAP100
m6A-circGUCY2C	miR-425-3p	BIN1
m6A-circGUCY2C	miR-425-3p	CCND1
m6A-circGUCY2C	miR-425-3p	ESRP1
m6A-circGUCY2C	miR-425-3p	USP11
m6A-circGUCY2C	miR-425-3p	WDR74
m6A-circGUCY2C	miR-425-3p	SEMA3B
m6A-circGUCY2C	miR-425-3p	CFL1
m6A-circGUCY2C	miR-425-3p	CD109
m6A-circGUCY2C	miR-425-3p	NUDT1
m6A-circGUCY2C	miR-425-3p	NEK8
m6A-circGUCY2C	miR-425-3p	ENSSSCG00000021991
m6A-circGUCY2C	miR-425-3p	ARSD
m6A-circGUCY2C	miR-425-3p	PRR5
m6A-circGUCY2C	miR-425-3p	HS6ST1
m6A-circGUCY2C	miR-425-3p	TGFA
m6A-circGUCY2C	miR-425-3p	AVPR2
m6A-circGUCY2C	miR-425-3p	NAALADL1
m6A-circGUCY2C	miR-425-3p	HARS1
m6A-circGUCY2C	miR-425-3p	ENSSSCG00000014554
m6A-circGUCY2C	miR-425-3p	ENSSSCG00000014565
m6A-circGUCY2C	miR-425-3p	ST14
m6A-circGUCY2C	miR-425-3p	DDX56
m6A-circGUCY2C	miR-425-3p	ADAT1
