# Supplementary material for: Expression Profile and Regulatory Properties of m6A-Modified circRNAs in the Longissimus Dorsi of Queshan Black and Large White Pigs
Source: Animals (Basel). 2023 Jul 4;13(13):2190. doi: 10.3390/ani13132190 (PMC10339870; doi:10.3390/ani13132190)
Supplement: Supplementary file 1 [file animals-13-02190-s001.zip › Supplementary Files/Table S5. List of m6A-circKIAA0513 related ceRNA regulatory networks.xlsx]

## Sheet: Sheet1
m6A-circRNA name	miRNA	gene name
m6A-circKIAA0513	miR-9806-5p	-
m6A-circKIAA0513	miR-16	C17orf49
m6A-circKIAA0513	miR-16	ZDHHC16
m6A-circKIAA0513	miR-16	PUF60
m6A-circKIAA0513	miR-16	DDX39A
m6A-circKIAA0513	miR-16	ZNF362
m6A-circKIAA0513	miR-16	IFNAR1
m6A-circKIAA0513	miR-16	MMS19
m6A-circKIAA0513	miR-16	TAF15
m6A-circKIAA0513	miR-16	CBY2
m6A-circKIAA0513	miR-16	ADORA2A
m6A-circKIAA0513	miR-16	ATG7
m6A-circKIAA0513	miR-16	ENSSSCG00000011925
m6A-circKIAA0513	miR-16	CCNQ
m6A-circKIAA0513	miR-16	ELF5
m6A-circKIAA0513	miR-16	EBI3
m6A-circKIAA0513	miR-16	SELENBP1
m6A-circKIAA0513	miR-16	CD69
m6A-circKIAA0513	miR-16	KIAA2013
m6A-circKIAA0513	miR-16	STUB1
m6A-circKIAA0513	miR-181b	INPP5E
m6A-circKIAA0513	miR-181b	CARD11
m6A-circKIAA0513	miR-181b	ZNF577
m6A-circKIAA0513	miR-181b	SEMA4F
m6A-circKIAA0513	miR-181b	MAPKBP1
m6A-circKIAA0513	miR-181b	LYPLA2
m6A-circKIAA0513	miR-181b	ATG2B
m6A-circKIAA0513	miR-181b	TAB2
m6A-circKIAA0513	miR-181b	BTNL9
m6A-circKIAA0513	miR-181b	MRPL57
m6A-circKIAA0513	miR-181b	SRL
m6A-circKIAA0513	miR-181b	COL16A1
m6A-circKIAA0513	miR-181b	ALOX12
m6A-circKIAA0513	miR-181b	SAP30BP
m6A-circKIAA0513	miR-181b	FDFT1
m6A-circKIAA0513	miR-181b	FBXO10
m6A-circKIAA0513	miR-181b	GRK4
m6A-circKIAA0513	miR-181b	ZDHHC3
m6A-circKIAA0513	miR-181b	SLC27A1
m6A-circKIAA0513	miR-181b	AEBP1
m6A-circKIAA0513	miR-181b	ENTHD1
m6A-circKIAA0513	miR-181b	KCNQ5
m6A-circKIAA0513	miR-181b	ENSSSCG00000007920
m6A-circKIAA0513	miR-181b	SLX4
m6A-circKIAA0513	miR-181d-5p	ZNF577
m6A-circKIAA0513	miR-181d-5p	LYPLA2
m6A-circKIAA0513	miR-181d-5p	ARF6
m6A-circKIAA0513	miR-181d-5p	MRPL57
m6A-circKIAA0513	miR-181d-5p	COL16A1
m6A-circKIAA0513	miR-181d-5p	ALOX12
m6A-circKIAA0513	miR-181d-5p	FDFT1
m6A-circKIAA0513	miR-181d-5p	PALB2
m6A-circKIAA0513	miR-181d-5p	ZDHHC3
m6A-circKIAA0513	miR-181d-5p	CCNQ
m6A-circKIAA0513	miR-181d-5p	AEBP1
m6A-circKIAA0513	miR-181d-5p	HSP90B1
m6A-circKIAA0513	miR-2411	PKM
m6A-circKIAA0513	miR-2411	RPS6KA2
m6A-circKIAA0513	miR-2411	SPINT2
m6A-circKIAA0513	miR-2411	DEPDC7
m6A-circKIAA0513	miR-2411	C1orf122
m6A-circKIAA0513	miR-2411	ECSCR
m6A-circKIAA0513	miR-2411	DCXR
m6A-circKIAA0513	miR-2411	PIGG
m6A-circKIAA0513	miR-2411	LSP1
m6A-circKIAA0513	miR-2411	ENSSSCG00000027232
m6A-circKIAA0513	miR-2411	CORO1A
m6A-circKIAA0513	miR-2411	WLS
m6A-circKIAA0513	miR-2411	MCOLN1
m6A-circKIAA0513	miR-2411	ENSSSCG00000057753
m6A-circKIAA0513	miR-2411	RABL6
m6A-circKIAA0513	miR-2411	OLFM1
m6A-circKIAA0513	miR-2411	TEAD2
m6A-circKIAA0513	miR-2411	CSNK1G1
m6A-circKIAA0513	miR-2411	DBNL
m6A-circKIAA0513	miR-2411	ENSSSCG00000040701
m6A-circKIAA0513	miR-2411	ADAM22
m6A-circKIAA0513	miR-2411	FBXO34
m6A-circKIAA0513	miR-2411	SLC25A42
m6A-circKIAA0513	miR-2411	TTI2
m6A-circKIAA0513	miR-2411	CD320
m6A-circKIAA0513	miR-2411	PARP6
m6A-circKIAA0513	miR-2411	SEMA4D
m6A-circKIAA0513	miR-2411	TSPAN7
m6A-circKIAA0513	miR-2411	CLDN7
m6A-circKIAA0513	miR-2411	TRPM4
m6A-circKIAA0513	miR-2411	SLC25A35
m6A-circKIAA0513	miR-2411	TCP11L1
m6A-circKIAA0513	miR-2411	CAPNS1
m6A-circKIAA0513	miR-2411	PCDH8
m6A-circKIAA0513	miR-2411	FBXW8
m6A-circKIAA0513	miR-2411	PCBD1
m6A-circKIAA0513	miR-2411	GLRX3
m6A-circKIAA0513	miR-2411	RETNLB
m6A-circKIAA0513	miR-2411	CTPS2
m6A-circKIAA0513	miR-2411	PNPLA6
m6A-circKIAA0513	miR-2411	CHRDL2
m6A-circKIAA0513	miR-2411	GLB1L2
m6A-circKIAA0513	miR-2411	C1QL1
m6A-circKIAA0513	miR-2411	WNT10B
m6A-circKIAA0513	miR-2411	ATP23
m6A-circKIAA0513	miR-2411	DNAAF1
m6A-circKIAA0513	miR-2411	ENSSSCG00000021947
m6A-circKIAA0513	miR-2411	RGS4
m6A-circKIAA0513	miR-2411	SLAMF6
m6A-circKIAA0513	miR-2411	SV2A
m6A-circKIAA0513	miR-339-3p	CFAP46
m6A-circKIAA0513	miR-339-3p	ABCC1
m6A-circKIAA0513	miR-339-3p	ATP6AP1
m6A-circKIAA0513	miR-339-3p	MED22
m6A-circKIAA0513	miR-339-3p	ENSSSCG00000033858
m6A-circKIAA0513	miR-339-3p	DHRS7C
m6A-circKIAA0513	miR-339-3p	COLGALT2
m6A-circKIAA0513	miR-339-3p	KIF26A
m6A-circKIAA0513	miR-339-3p	ACAD10
m6A-circKIAA0513	miR-339-3p	MLYCD
m6A-circKIAA0513	miR-339-3p	PDAP1
m6A-circKIAA0513	miR-339-3p	HMGCS2
m6A-circKIAA0513	miR-339-3p	ENSSSCG00000062785
m6A-circKIAA0513	miR-339-3p	ARRDC1
m6A-circKIAA0513	miR-339-3p	ENSSSCG00000035669
m6A-circKIAA0513	miR-339-3p	TRABD
m6A-circKIAA0513	miR-339-3p	VPREB3
m6A-circKIAA0513	miR-339-3p	ATP2A3
m6A-circKIAA0513	miR-339-3p	CAPN10
m6A-circKIAA0513	miR-339-3p	SKAP1
m6A-circKIAA0513	miR-339-3p	MAP3K11
m6A-circKIAA0513	miR-339-3p	CARM1
m6A-circKIAA0513	miR-339-3p	CACFD1
m6A-circKIAA0513	miR-339-3p	DLL1
m6A-circKIAA0513	miR-339-3p	SMCR8
m6A-circKIAA0513	miR-339-3p	HSF1
m6A-circKIAA0513	miR-339-3p	ADD1
m6A-circKIAA0513	miR-339-3p	CXCR5
m6A-circKIAA0513	miR-339-3p	RGS19
m6A-circKIAA0513	miR-339-3p	STAT5B
m6A-circKIAA0513	miR-339-3p	ADAT1
m6A-circKIAA0513	miR-339-3p	CBX8
m6A-circKIAA0513	miR-339-3p	C8G
m6A-circKIAA0513	miR-339-3p	CALHM2
m6A-circKIAA0513	miR-339-3p	RRAD
m6A-circKIAA0513	miR-339-3p	NAA60
m6A-circKIAA0513	miR-339-3p	ENSSSCG00000037995
m6A-circKIAA0513	miR-339-3p	PRMT1
m6A-circKIAA0513	miR-339-3p	ABCF2
m6A-circKIAA0513	miR-339-3p	FAM120B
m6A-circKIAA0513	miR-339-3p	RASSF5
m6A-circKIAA0513	miR-339-3p	PHACTR1
m6A-circKIAA0513	miR-339-3p	RNF4
m6A-circKIAA0513	miR-339-3p	IMPDH2
m6A-circKIAA0513	miR-339-3p	TEDC1
m6A-circKIAA0513	miR-339-3p	BAX
m6A-circKIAA0513	miR-339-3p	ATXN7L1
m6A-circKIAA0513	miR-339-3p	ZNF740
m6A-circKIAA0513	miR-339-3p	PVALB
m6A-circKIAA0513	miR-339-3p	PVALEF
m6A-circKIAA0513	miR-339-3p	ZNHIT1
m6A-circKIAA0513	miR-339-3p	DCAF1
m6A-circKIAA0513	miR-339-3p	ULK4
m6A-circKIAA0513	miR-339-3p	AGFG2
m6A-circKIAA0513	miR-339-3p	TMED1
m6A-circKIAA0513	miR-339-3p	SFSWAP
m6A-circKIAA0513	miR-339-3p	RAP1GAP
m6A-circKIAA0513	miR-339-3p	ADRM1
m6A-circKIAA0513	miR-339-3p	ENSSSCG00000027916
m6A-circKIAA0513	miR-339-3p	PICK1
m6A-circKIAA0513	miR-339-3p	ENSSSCG00000033594
m6A-circKIAA0513	miR-339-3p	GADD45GIP1
m6A-circKIAA0513	miR-339-3p	INO80E
m6A-circKIAA0513	miR-339-3p	HSPA12B
m6A-circKIAA0513	miR-339-3p	PLCH2
m6A-circKIAA0513	miR-339-3p	IRF1
m6A-circKIAA0513	miR-339-3p	PTPA
m6A-circKIAA0513	miR-339-3p	GRIPAP1
m6A-circKIAA0513	miR-339-3p	MAP4K2
m6A-circKIAA0513	miR-339-3p	SEMA4D
m6A-circKIAA0513	miR-339-3p	DRD2
m6A-circKIAA0513	miR-339-3p	SLC35E2B
m6A-circKIAA0513	miR-339-3p	TMEM130
m6A-circKIAA0513	miR-339-3p	IFT88
m6A-circKIAA0513	miR-339-3p	ENSSSCG00000031893
m6A-circKIAA0513	miR-339-3p	BSCL2
m6A-circKIAA0513	miR-339-3p	KIAA1755
m6A-circKIAA0513	miR-339-3p	FANCG
m6A-circKIAA0513	miR-339-3p	ELOVL1
m6A-circKIAA0513	miR-339-3p	PTPRH
m6A-circKIAA0513	miR-339-3p	SCAF8
m6A-circKIAA0513	miR-339-3p	OBSL1
m6A-circKIAA0513	miR-339-3p	SH3RF3
m6A-circKIAA0513	miR-339-3p	PYCR1
m6A-circKIAA0513	miR-339-3p	ENSSSCG00000036356
m6A-circKIAA0513	miR-339-3p	ENSSSCG00000020967
m6A-circKIAA0513	miR-339-3p	BHLHA15
m6A-circKIAA0513	miR-339-3p	SPEF1
m6A-circKIAA0513	miR-339-3p	NOXRED1
m6A-circKIAA0513	miR-339-3p	ARAP3
m6A-circKIAA0513	miR-339-3p	ZNF205
m6A-circKIAA0513	miR-339-3p	SLC2A4RG
m6A-circKIAA0513	miR-339-3p	TK2
m6A-circKIAA0513	miR-339-3p	ENSSSCG00000043116
m6A-circKIAA0513	miR-339-3p	NUMA1
m6A-circKIAA0513	miR-339-3p	SLC22A12
m6A-circKIAA0513	miR-339-3p	RCVRN
m6A-circKIAA0513	miR-339-3p	ELOVL2
m6A-circKIAA0513	miR-339-3p	UBIAD1
m6A-circKIAA0513	miR-339-3p	FBLIM1
m6A-circKIAA0513	miR-339-3p	GDPD5
m6A-circKIAA0513	miR-339-3p	CYB561D1
m6A-circKIAA0513	miR-339-3p	PI4KB
m6A-circKIAA0513	miR-339-3p	RBM23
m6A-circKIAA0513	miR-339-3p	ENSSSCG00000059203
m6A-circKIAA0513	miR-339-3p	TMEM177
m6A-circKIAA0513	miR-339-3p	TMEM125
m6A-circKIAA0513	miR-339-3p	LSS
m6A-circKIAA0513	miR-339-3p	CSRP1
m6A-circKIAA0513	miR-339-3p	RALGAPA2
m6A-circKIAA0513	miR-339-3p	ZBTB45
m6A-circKIAA0513	miR-339-3p	CDHR5
m6A-circKIAA0513	miR-339-3p	EXOC7
m6A-circKIAA0513	miR-339-3p	MFAP2
m6A-circKIAA0513	miR-339-3p	PLA2G2D
m6A-circKIAA0513	miR-339-3p	DBF4B
m6A-circKIAA0513	miR-339-3p	ENSSSCG00000035960
m6A-circKIAA0513	miR-339-3p	CYP26B1
m6A-circKIAA0513	miR-339-3p	SCARA3
m6A-circKIAA0513	miR-339-3p	SMARCB1
m6A-circKIAA0513	miR-339-3p	NCAPG2
m6A-circKIAA0513	miR-339-3p	RAB35
m6A-circKIAA0513	miR-339-3p	KCNAB3
m6A-circKIAA0513	miR-339-3p	ATG4B
m6A-circKIAA0513	miR-339-3p	TOM1L2
m6A-circKIAA0513	miR-339-3p	MARK4
m6A-circKIAA0513	miR-339-3p	PIK3R5
m6A-circKIAA0513	miR-339-3p	TTYH2
m6A-circKIAA0513	miR-339-3p	ENSSSCG00000005834
m6A-circKIAA0513	miR-339-3p	CEP43
m6A-circKIAA0513	miR-339-3p	GPIHBP1
m6A-circKIAA0513	miR-339-3p	FAM163A
m6A-circKIAA0513	miR-339-3p	LGMN
m6A-circKIAA0513	miR-339-3p	WWP2
m6A-circKIAA0513	miR-339-3p	ARIH2
m6A-circKIAA0513	miR-339-3p	BCAR1
m6A-circKIAA0513	miR-339-3p	NUBP2
m6A-circKIAA0513	miR-339-3p	SYVN1
m6A-circKIAA0513	miR-339-3p	TTC7A
m6A-circKIAA0513	miR-339-3p	RDH13
m6A-circKIAA0513	miR-339-3p	ENSSSCG00000013990
m6A-circKIAA0513	miR-339-3p	DNAJB6
m6A-circKIAA0513	miR-339-3p	DLK1
m6A-circKIAA0513	miR-339-3p	STAG1
m6A-circKIAA0513	miR-339-3p	CDC37
m6A-circKIAA0513	miR-339-3p	SGPL1
m6A-circKIAA0513	miR-339-3p	MGAT3
m6A-circKIAA0513	miR-339-3p	MCRIP1
m6A-circKIAA0513	miR-339-3p	RCC2
m6A-circKIAA0513	miR-339-3p	MTMR1
m6A-circKIAA0513	miR-339-3p	EFEMP2
m6A-circKIAA0513	miR-339-3p	ZDHHC3
m6A-circKIAA0513	miR-339-3p	HCRTR1
m6A-circKIAA0513	miR-339-3p	MFSD6
m6A-circKIAA0513	miR-339-3p	SP110
m6A-circKIAA0513	miR-339-3p	PEX5
m6A-circKIAA0513	miR-339-3p	LMAN2L
m6A-circKIAA0513	miR-339-3p	IGFBP2
m6A-circKIAA0513	miR-339-3p	ENSSSCG00000003990
m6A-circKIAA0513	miR-339-3p	CHRNB2
m6A-circKIAA0513	miR-339-3p	KRT17
m6A-circKIAA0513	miR-339-3p	AP1B1
m6A-circKIAA0513	miR-339-3p	NAGA
m6A-circKIAA0513	miR-339-3p	EMILIN1
m6A-circKIAA0513	miR-339-3p	TNNT1
m6A-circKIAA0513	miR-339-3p	UCKL1
m6A-circKIAA0513	miR-339-3p	STK11IP
m6A-circKIAA0513	miR-339-3p	CSK
m6A-circKIAA0513	miR-339-3p	SPOCK2
m6A-circKIAA0513	miR-339-3p	ARVCF
m6A-circKIAA0513	miR-339-3p	SIRT7
m6A-circKIAA0513	miR-339-3p	ABHD12
m6A-circKIAA0513	miR-339-3p	CELSR1
m6A-circKIAA0513	miR-339-3p	HYOU1
m6A-circKIAA0513	miR-339-3p	HSPA4
m6A-circKIAA0513	miR-339-3p	TBC1D17
m6A-circKIAA0513	miR-339-3p	PSMC3
m6A-circKIAA0513	miR-339-3p	SPOUT1
m6A-circKIAA0513	miR-339-3p	ENSSSCG00000062259
m6A-circKIAA0513	miR-339-3p	LPIN2
m6A-circKIAA0513	miR-339-3p	TBL2
m6A-circKIAA0513	miR-339-3p	HDAC8
m6A-circKIAA0513	miR-339-3p	STIP1
m6A-circKIAA0513	miR-339-3p	C14orf132
m6A-circKIAA0513	miR-339-3p	DTYMK
m6A-circKIAA0513	miR-339-3p	ECI1
m6A-circKIAA0513	miR-339-3p	NLRP6
m6A-circKIAA0513	miR-339-3p	ARHGAP26
m6A-circKIAA0513	miR-339-3p	PEF1
m6A-circKIAA0513	miR-339-3p	NSMF
m6A-circKIAA0513	miR-339-3p	DGKZ
m6A-circKIAA0513	miR-339-3p	POLR3H
m6A-circKIAA0513	miR-339-3p	SLC38A10
m6A-circKIAA0513	miR-339-3p	SMARCC2
m6A-circKIAA0513	miR-339-3p	BAIAP2
m6A-circKIAA0513	miR-339-3p	ENSSSCG00000002963
m6A-circKIAA0513	miR-339-3p	ENSSSCG00000013097
m6A-circKIAA0513	miR-339-3p	ABR
m6A-circKIAA0513	miR-339-3p	RAB43
m6A-circKIAA0513	miR-339-3p	GAS7
m6A-circKIAA0513	miR-339-3p	LRPAP1
m6A-circKIAA0513	miR-339-3p	CCDC9
m6A-circKIAA0513	miR-339-3p	SERAC1
m6A-circKIAA0513	miR-339-3p	NRAP
m6A-circKIAA0513	miR-339-3p	TMEM179
m6A-circKIAA0513	miR-339-3p	TMEM143
m6A-circKIAA0513	miR-339-3p	HROB
m6A-circKIAA0513	miR-339-3p	LEMD2
m6A-circKIAA0513	miR-339-3p	PCYT2
m6A-circKIAA0513	miR-339-3p	CACNA1H
m6A-circKIAA0513	miR-339-3p	PWWP3A
m6A-circKIAA0513	miR-339-3p	DIPK1C
m6A-circKIAA0513	miR-339-3p	GPD1
m6A-circKIAA0513	miR-339-3p	PLEKHN1
m6A-circKIAA0513	miR-339-3p	SNAI1
m6A-circKIAA0513	miR-339-3p	ENSSSCG00000013150
m6A-circKIAA0513	miR-339-3p	CCDC184
m6A-circKIAA0513	miR-339-3p	CD276
m6A-circKIAA0513	miR-339-3p	ACTR8
m6A-circKIAA0513	miR-339-3p	EBF3
m6A-circKIAA0513	miR-339-3p	EDF1
m6A-circKIAA0513	miR-339-3p	ENSSSCG00000005901
m6A-circKIAA0513	miR-339-3p	HEXD
m6A-circKIAA0513	miR-339-3p	SMIM5
m6A-circKIAA0513	miR-339-3p	ROS1
m6A-circKIAA0513	miR-339-3p	JAKMIP2
m6A-circKIAA0513	miR-339-3p	AMOTL1
m6A-circKIAA0513	miR-339-3p	ENSSSCG00000021579
m6A-circKIAA0513	miR-339-3p	EEPD1
m6A-circKIAA0513	miR-339-3p	MANF
m6A-circKIAA0513	miR-339-3p	TMEM185A
m6A-circKIAA0513	miR-339-3p	SYNGR2
m6A-circKIAA0513	miR-339-3p	NTAN1
m6A-circKIAA0513	miR-339-3p	MAP3K3
m6A-circKIAA0513	miR-339-3p	ENSSSCG00000034192
m6A-circKIAA0513	miR-339-3p	TOM1
m6A-circKIAA0513	miR-339-3p	MAPK12
m6A-circKIAA0513	miR-339-3p	LY6E
m6A-circKIAA0513	miR-339-3p	POMT1
m6A-circKIAA0513	miR-339-3p	ABHD8
m6A-circKIAA0513	miR-339-3p	KRT36
m6A-circKIAA0513	miR-339-3p	CORO1B
m6A-circKIAA0513	miR-339-3p	GRIN1
m6A-circKIAA0513	miR-339-3p	TMEM150A
m6A-circKIAA0513	miR-339-3p	TRAPPC2L
m6A-circKIAA0513	miR-339-3p	DHRS4
m6A-circKIAA0513	miR-339-3p	DAZAP2
m6A-circKIAA0513	miR-339-3p	SAMD11
m6A-circKIAA0513	miR-339-3p	EHD1
m6A-circKIAA0513	miR-339-3p	E2F2
m6A-circKIAA0513	miR-339-3p	RPL35A
m6A-circKIAA0513	miR-339-3p	ZNF691
m6A-circKIAA0513	miR-339-3p	SURF2
m6A-circKIAA0513	miR-339-3p	PRR33
m6A-circKIAA0513	miR-339-3p	JSRP1
m6A-circKIAA0513	miR-339-3p	GTF2IRD1
m6A-circKIAA0513	miR-339-3p	PSMA7
m6A-circKIAA0513	miR-339-3p	KCNQ2
m6A-circKIAA0513	miR-339-3p	ENSSSCG00000008097
m6A-circKIAA0513	miR-339-3p	SLC43A2
m6A-circKIAA0513	miR-339-3p	EPS15L1
m6A-circKIAA0513	miR-339-3p	DEF8
m6A-circKIAA0513	miR-339-3p	SIVA1
m6A-circKIAA0513	miR-339-3p	ASB13
m6A-circKIAA0513	miR-339-3p	ENSSSCG00000032248
m6A-circKIAA0513	miR-339-3p	PER1
m6A-circKIAA0513	miR-339-3p	ENSSSCG00000004520
m6A-circKIAA0513	miR-339-3p	FGFR1
m6A-circKIAA0513	miR-339-3p	ENSSSCG00000030821
m6A-circKIAA0513	miR-339-3p	SDC1
m6A-circKIAA0513	miR-339-3p	GABBR1
m6A-circKIAA0513	miR-339-3p	PIDD1
m6A-circKIAA0513	miR-339-3p	REPS2
m6A-circKIAA0513	miR-339-3p	RNF43
m6A-circKIAA0513	miR-339-3p	TRAF3
m6A-circKIAA0513	miR-339-3p	SAMD14
m6A-circKIAA0513	miR-339-3p	ITGAE
m6A-circKIAA0513	miR-339-3p	ASB9
m6A-circKIAA0513	miR-339-3p	PDZD11
m6A-circKIAA0513	miR-339-3p	TGM1
m6A-circKIAA0513	miR-339-3p	CLEC16A
m6A-circKIAA0513	miR-339-3p	CLEC3B
m6A-circKIAA0513	miR-339-3p	FGFR4
m6A-circKIAA0513	miR-339-3p	TUFT1
m6A-circKIAA0513	miR-339-3p	PPP2R3B
m6A-circKIAA0513	miR-339-3p	B4GALT2
m6A-circKIAA0513	miR-339-3p	RTN4RL2
m6A-circKIAA0513	miR-339-3p	FADS2
m6A-circKIAA0513	miR-339-3p	RHBG
m6A-circKIAA0513	miR-339-3p	NFASC
m6A-circKIAA0513	miR-339-3p	NUP214
m6A-circKIAA0513	miR-339-3p	MADD
m6A-circKIAA0513	miR-339-3p	KRT4
m6A-circKIAA0513	miR-339-3p	ORMDL3
m6A-circKIAA0513	miR-339-3p	SNUPN
m6A-circKIAA0513	miR-339-3p	PRKCD
m6A-circKIAA0513	miR-339-3p	TBL3
m6A-circKIAA0513	miR-339-3p	MYO19
m6A-circKIAA0513	miR-339-3p	PPCDC
m6A-circKIAA0513	miR-339-3p	ABCA3
m6A-circKIAA0513	miR-339-3p	PRMT5
m6A-circKIAA0513	miR-339-3p	CHAC1
m6A-circKIAA0513	miR-339-3p	ENSSSCG00000040134
m6A-circKIAA0513	miR-339-3p	AAGAB
m6A-circKIAA0513	miR-339-3p	BCKDHA
m6A-circKIAA0513	miR-339-3p	HPCA
m6A-circKIAA0513	miR-339-3p	AMBRA1
m6A-circKIAA0513	miR-339-3p	MTA1
m6A-circKIAA0513	miR-339-3p	MGRN1
m6A-circKIAA0513	miR-339-3p	ENSSSCG00000061743
m6A-circKIAA0513	miR-339-3p	DDX51
m6A-circKIAA0513	miR-339-3p	CDKN1C
m6A-circKIAA0513	miR-339-3p	AMIGO3
m6A-circKIAA0513	miR-339-3p	NEU3
m6A-circKIAA0513	miR-339-3p	SIDT1
m6A-circKIAA0513	miR-339-3p	NPR2
m6A-circKIAA0513	miR-339-3p	SLX4
m6A-circKIAA0513	miR-339-3p	CMIP
m6A-circKIAA0513	miR-339-3p	PEX14
m6A-circKIAA0513	miR-339-3p	EVA1A
m6A-circKIAA0513	miR-339-3p	ZNF3
m6A-circKIAA0513	miR-339-3p	CHST8
m6A-circKIAA0513	miR-339-3p	TSPAN15
m6A-circKIAA0513	miR-339-3p	GMPPB
m6A-circKIAA0513	miR-339-3p	ENSSSCG00000037038
m6A-circKIAA0513	miR-339-3p	KCNT1
m6A-circKIAA0513	miR-339-3p	LPCAT1
m6A-circKIAA0513	miR-339-3p	SLC6A19
m6A-circKIAA0513	miR-339-3p	SLC6A3
m6A-circKIAA0513	miR-339-3p	NARF
m6A-circKIAA0513	miR-339-3p	RAB40B
m6A-circKIAA0513	miR-339-3p	WDR45B
m6A-circKIAA0513	miR-339-3p	NPTX1
m6A-circKIAA0513	miR-339-3p	SLC26A11
m6A-circKIAA0513	miR-339-3p	SEPTIN9
m6A-circKIAA0513	miR-339-3p	MRPL38
m6A-circKIAA0513	miR-339-3p	CDR2L
m6A-circKIAA0513	miR-339-3p	MRC2
m6A-circKIAA0513	miR-339-3p	ENSSSCG00000017331
m6A-circKIAA0513	miR-339-3p	NMT1
m6A-circKIAA0513	miR-339-3p	DCAKD
m6A-circKIAA0513	miR-339-3p	ADAM11
m6A-circKIAA0513	miR-339-3p	MEOX1
m6A-circKIAA0513	miR-339-3p	ETV4
m6A-circKIAA0513	miR-339-3p	HOXB2
m6A-circKIAA0513	miR-339-3p	HOXB5
m6A-circKIAA0513	miR-339-3p	NEK8
m6A-circKIAA0513	miR-339-3p	TRARG1
m6A-circKIAA0513	miR-339-3p	TAX1BP3
m6A-circKIAA0513	miR-339-3p	MYBBP1A
m6A-circKIAA0513	miR-339-3p	PITPNM3
m6A-circKIAA0513	miR-339-3p	NEURL4
m6A-circKIAA0513	miR-339-3p	ZNRD2
m6A-circKIAA0513	miR-339-3p	NMT2
m6A-circKIAA0513	miR-339-3p	DLG4
m6A-circKIAA0513	miR-339-3p	KDM2A
m6A-circKIAA0513	miR-339-3p	ASAP3
m6A-circKIAA0513	miR-339-3p	CBX2
m6A-circKIAA0513	miR-339-3p	ENSSSCG00000022246
m6A-circKIAA0513	miR-339-3p	B3GAT3
m6A-circKIAA0513	miR-339-3p	BPIFB6
m6A-circKIAA0513	miR-339-3p	EPHB3
m6A-circKIAA0513	miR-339-3p	SAP30BP
m6A-circKIAA0513	miR-339-3p	GTPBP4
m6A-circKIAA0513	miR-339-3p	AJUBA
m6A-circKIAA0513	miR-339-3p	OTUD5
m6A-circKIAA0513	miR-339-3p	DVL3
m6A-circKIAA0513	miR-339-3p	CDC42EP1
m6A-circKIAA0513	miR-339-3p	SLC4A8
m6A-circKIAA0513	miR-339-3p	SKA3
m6A-circKIAA0513	miR-339-3p	CATSPER4
m6A-circKIAA0513	miR-339-3p	HDAC11
m6A-circKIAA0513	miR-339-3p	SLC22A7
m6A-circKIAA0513	miR-339-3p	SSUH2
m6A-circKIAA0513	miR-339-3p	SLC30A2
m6A-circKIAA0513	miR-339-3p	AP3S2
m6A-circKIAA0513	miR-339-3p	FSCN1
m6A-circKIAA0513	miR-339-3p	TMEM120A
m6A-circKIAA0513	miR-339-3p	RAB20
m6A-circKIAA0513	miR-339-3p	C15orf40
m6A-circKIAA0513	miR-339-3p	ENSSSCG00000024070
m6A-circKIAA0513	miR-339-3p	ALKBH7
m6A-circKIAA0513	miR-339-3p	UNC5CL
m6A-circKIAA0513	miR-339-3p	UBASH3A
m6A-circKIAA0513	miR-339-3p	ASIC3
m6A-circKIAA0513	miR-339-3p	CHMP1A
m6A-circKIAA0513	miR-339-3p	TIMM17B
m6A-circKIAA0513	miR-339-3p	ENSSSCG00000029761
m6A-circKIAA0513	miR-339-3p	ENSSSCG00000006510
m6A-circKIAA0513	miR-339-3p	SLC41A1
m6A-circKIAA0513	miR-339-3p	MYOM1
m6A-circKIAA0513	miR-339-3p	ENSSSCG00000026701
m6A-circKIAA0513	miR-339-3p	PRXL2B
m6A-circKIAA0513	miR-339-3p	ADD2
m6A-circKIAA0513	miR-339-3p	ENSSSCG00000027124
m6A-circKIAA0513	miR-339-3p	KRT31
m6A-circKIAA0513	miR-339-3p	ANKRD16
m6A-circKIAA0513	miR-339-3p	ADCY5
m6A-circKIAA0513	miR-339-3p	GTPBP1
m6A-circKIAA0513	miR-339-3p	KCNK5
m6A-circKIAA0513	miR-339-3p	MARK1
m6A-circKIAA0513	miR-339-3p	ZGPAT
m6A-circKIAA0513	miR-339-3p	ACAP1
m6A-circKIAA0513	miR-339-3p	ENSSSCG00000028810
m6A-circKIAA0513	miR-339-3p	SCARF1
m6A-circKIAA0513	miR-339-3p	GAK
m6A-circKIAA0513	miR-339-3p	GIGYF1
m6A-circKIAA0513	miR-339-3p	MZB1
m6A-circKIAA0513	miR-339-3p	ARHGEF16
m6A-circKIAA0513	miR-339-3p	SERINC2
m6A-circKIAA0513	miR-339-3p	ARMC10
m6A-circKIAA0513	miR-339-3p	BYSL
m6A-circKIAA0513	miR-339-3p	AFF1
m6A-circKIAA0513	miR-339-3p	KLHL17
m6A-circKIAA0513	miR-339-3p	HPCAL4
m6A-circKIAA0513	miR-339-3p	ENSSSCG00000028777
m6A-circKIAA0513	miR-339-3p	THRAP3
m6A-circKIAA0513	miR-339-3p	WIZ
m6A-circKIAA0513	miR-339-3p	PHC1
m6A-circKIAA0513	miR-339-3p	MEPCE
m6A-circKIAA0513	miR-339-3p	KCNK3
m6A-circKIAA0513	miR-339-3p	NSD2
m6A-circKIAA0513	miR-339-3p	ZNF330
m6A-circKIAA0513	miR-339-3p	SLC7A1
m6A-circKIAA0513	miR-339-3p	FHIP2B
m6A-circKIAA0513	miR-339-3p	C8orf58
m6A-circKIAA0513	miR-339-3p	BIN3
m6A-circKIAA0513	miR-339-3p	SH3RF1
m6A-circKIAA0513	miR-339-3p	RHOF
m6A-circKIAA0513	miR-339-3p	MORN3
m6A-circKIAA0513	miR-339-3p	RBM19
m6A-circKIAA0513	miR-339-3p	CABP1
m6A-circKIAA0513	miR-339-3p	FICD
m6A-circKIAA0513	miR-339-3p	SPECC1L
m6A-circKIAA0513	miR-339-3p	MARCHF8
m6A-circKIAA0513	miR-339-3p	CPXM2
m6A-circKIAA0513	miR-339-3p	LRRC27
m6A-circKIAA0513	miR-339-3p	PSEN2
m6A-circKIAA0513	miR-339-3p	CNTFR
m6A-circKIAA0513	miR-339-3p	PITRM1
m6A-circKIAA0513	miR-339-3p	ENSSSCG00000011162
m6A-circKIAA0513	miR-339-3p	ENSSSCG00000011290
m6A-circKIAA0513	miR-339-3p	IP6K1
m6A-circKIAA0513	miR-339-3p	POC1A
m6A-circKIAA0513	miR-339-3p	BAP1
m6A-circKIAA0513	miR-339-3p	TAMM41
m6A-circKIAA0513	miR-339-3p	NUP210
m6A-circKIAA0513	miR-339-3p	PCOLCE2
m6A-circKIAA0513	miR-339-3p	MELTF
m6A-circKIAA0513	miR-339-3p	SYN1
m6A-circKIAA0513	miR-339-3p	IQSEC2
m6A-circKIAA0513	miR-339-3p	GDPD2
m6A-circKIAA0513	miR-339-3p	SLC22A18
m6A-circKIAA0513	miR-339-3p	ANKRD13D
m6A-circKIAA0513	miR-339-3p	OTUB1
m6A-circKIAA0513	miR-339-3p	SPINDOC
m6A-circKIAA0513	miR-339-3p	CHST1
m6A-circKIAA0513	miR-339-3p	ABTB2
m6A-circKIAA0513	miR-339-3p	TMEM86A
m6A-circKIAA0513	miR-339-3p	ENSSSCG00000013530
m6A-circKIAA0513	miR-339-3p	ELAVL3
m6A-circKIAA0513	miR-339-3p	KRI1
m6A-circKIAA0513	miR-339-3p	ENSSSCG00000013665
m6A-circKIAA0513	miR-339-3p	FARSA
m6A-circKIAA0513	miR-339-3p	NACC1
m6A-circKIAA0513	miR-339-3p	CC2D1A
m6A-circKIAA0513	miR-339-3p	KLHL26
m6A-circKIAA0513	miR-339-3p	RGS14
m6A-circKIAA0513	miR-339-3p	LMAN2
m6A-circKIAA0513	miR-339-3p	SEPTIN8
m6A-circKIAA0513	miR-339-3p	GDF9
m6A-circKIAA0513	miR-339-3p	FCHSD1
m6A-circKIAA0513	miR-339-3p	ENSSSCG00000059517
m6A-circKIAA0513	miR-339-3p	SPA17
m6A-circKIAA0513	miR-339-3p	ROBO3
m6A-circKIAA0513	miR-339-3p	ADAMTS15
m6A-circKIAA0513	miR-339-3p	FMOD
m6A-circKIAA0513	miR-339-3p	RGS16
m6A-circKIAA0513	miR-339-3p	ENSSSCG00000015632
m6A-circKIAA0513	miR-339-3p	ITM2C
m6A-circKIAA0513	miR-339-3p	ENSSSCG00000016475
m6A-circKIAA0513	miR-339-3p	HOXA11
m6A-circKIAA0513	miR-339-3p	TMEM161A
m6A-circKIAA0513	miR-339-3p	ANK1
m6A-circKIAA0513	miR-339-3p	ENSSSCG00000008016
m6A-circKIAA0513	miR-339-3p	LLCFC1
m6A-circKIAA0513	miR-339-3p	NLRC5
m6A-circKIAA0513	miR-339-3p	YIPF3
m6A-circKIAA0513	miR-339-3p	FBXO41
m6A-circKIAA0513	miR-339-3p	AMDHD2
m6A-circKIAA0513	miR-339-3p	ANG
m6A-circKIAA0513	miR-339-3p	GRAMD4
m6A-circKIAA0513	miR-339-3p	ENSSSCG00000040164
m6A-circKIAA0513	miR-339-3p	ENSSSCG00000038540
m6A-circKIAA0513	miR-339-3p	ENSSSCG00000040118
m6A-circKIAA0513	miR-339-3p	COPS3
m6A-circKIAA0513	miR-339-3p	CYP4B1
m6A-circKIAA0513	miR-339-3p	AIF1L
m6A-circKIAA0513	miR-339-3p	ENSSSCG00000000002
m6A-circKIAA0513	miR-339-3p	TRMU
m6A-circKIAA0513	miR-339-3p	PARVG
m6A-circKIAA0513	miR-339-3p	KCTD17
m6A-circKIAA0513	miR-339-3p	CSF2RB
m6A-circKIAA0513	miR-339-3p	DHH
m6A-circKIAA0513	miR-339-3p	C1QL4
m6A-circKIAA0513	miR-339-3p	MMP19
m6A-circKIAA0513	miR-339-3p	ARHGAP9
m6A-circKIAA0513	miR-339-3p	LRRC23
m6A-circKIAA0513	miR-339-3p	ECI2
m6A-circKIAA0513	miR-339-3p	TUBB
m6A-circKIAA0513	miR-339-3p	NRN1
m6A-circKIAA0513	miR-339-3p	NEU1
m6A-circKIAA0513	miR-339-3p	HLA-DRA
m6A-circKIAA0513	miR-339-3p	PPARD
m6A-circKIAA0513	miR-339-3p	RSPH9
m6A-circKIAA0513	miR-339-3p	FANCI
m6A-circKIAA0513	miR-339-3p	MESP1
m6A-circKIAA0513	miR-339-3p	IMP3
m6A-circKIAA0513	miR-339-3p	C15orf39
m6A-circKIAA0513	miR-339-3p	ULK3
m6A-circKIAA0513	miR-339-3p	EDC3
m6A-circKIAA0513	miR-339-3p	CYP1A1
m6A-circKIAA0513	miR-339-3p	PSME1
m6A-circKIAA0513	miR-339-3p	THTPA
m6A-circKIAA0513	miR-339-3p	RGMA
m6A-circKIAA0513	miR-339-3p	TMEM63C
m6A-circKIAA0513	miR-339-3p	OTUB2
m6A-circKIAA0513	miR-339-3p	SLC25A47
m6A-circKIAA0513	miR-339-3p	PPP1R13B
m6A-circKIAA0513	miR-339-3p	KIAA0513
m6A-circKIAA0513	miR-339-3p	ATP2C2
m6A-circKIAA0513	miR-339-3p	TAF1C
m6A-circKIAA0513	miR-339-3p	COG8
m6A-circKIAA0513	miR-339-3p	ENSSSCG00000002790
m6A-circKIAA0513	miR-339-3p	MMP15
m6A-circKIAA0513	miR-339-3p	ENSSSCG00000002855
m6A-circKIAA0513	miR-339-3p	SLC7A10
m6A-circKIAA0513	miR-339-3p	RBM42
m6A-circKIAA0513	miR-339-3p	ACTN4
m6A-circKIAA0513	miR-339-3p	MED25
m6A-circKIAA0513	miR-339-3p	VWA1
m6A-circKIAA0513	miR-339-3p	KLHL21
m6A-circKIAA0513	miR-339-3p	ZBTB48
m6A-circKIAA0513	miR-339-3p	PARK7
m6A-circKIAA0513	miR-339-3p	PLEKHM2
m6A-circKIAA0513	miR-339-3p	LDLRAP1
m6A-circKIAA0513	miR-339-3p	RPS6KA1
m6A-circKIAA0513	miR-339-3p	SFN
m6A-circKIAA0513	miR-339-3p	PTPRU
m6A-circKIAA0513	miR-339-3p	FAM167B
m6A-circKIAA0513	miR-339-3p	ADPRS
m6A-circKIAA0513	miR-339-3p	ENSSSCG00000003984
m6A-circKIAA0513	miR-339-3p	SETBP1
m6A-circKIAA0513	miR-339-3p	LRRK1
m6A-circKIAA0513	miR-339-3p	FAM189A2
m6A-circKIAA0513	miR-339-3p	RUSC2
m6A-circKIAA0513	miR-339-3p	TEX10
m6A-circKIAA0513	miR-339-3p	BRINP1
m6A-circKIAA0513	miR-339-3p	CRB2
m6A-circKIAA0513	miR-339-3p	CDK9
m6A-circKIAA0513	miR-339-3p	SLC27A4
m6A-circKIAA0513	miR-339-3p	LRRC8A
m6A-circKIAA0513	miR-339-3p	CRAT
m6A-circKIAA0513	miR-339-3p	ASB6
m6A-circKIAA0513	miR-339-3p	ASS1
m6A-circKIAA0513	miR-339-3p	FIBCD1
m6A-circKIAA0513	miR-339-3p	GTF3C4
m6A-circKIAA0513	miR-339-3p	ENTPD8
m6A-circKIAA0513	miR-339-3p	MSTO1
m6A-circKIAA0513	miR-339-3p	CRP
m6A-circKIAA0513	miR-339-3p	ENSSSCG00000006455
m6A-circKIAA0513	miR-339-3p	BCAN
m6A-circKIAA0513	miR-339-3p	SEMA4A
m6A-circKIAA0513	miR-339-3p	DAP3
m6A-circKIAA0513	miR-339-3p	PGB
m6A-circKIAA0513	miR-339-3p	BARHL2
m6A-circKIAA0513	miR-339-3p	RHPN1
m6A-circKIAA0513	miR-339-3p	C20orf27
m6A-circKIAA0513	miR-339-3p	STK35
m6A-circKIAA0513	miR-339-3p	PLAGL2
m6A-circKIAA0513	miR-339-3p	PIGU
m6A-circKIAA0513	miR-339-3p	ENSSSCG00000007336
m6A-circKIAA0513	miR-339-3p	NPEPL1
m6A-circKIAA0513	miR-339-3p	PSMG3
m6A-circKIAA0513	miR-339-3p	TMEM184A
m6A-circKIAA0513	miR-339-3p	AP5Z1
m6A-circKIAA0513	miR-339-3p	BUD31
m6A-circKIAA0513	miR-339-3p	ENSSSCG00000034019
m6A-circKIAA0513	miR-339-3p	TFR2
m6A-circKIAA0513	miR-339-3p	TRIM72
m6A-circKIAA0513	miR-339-3p	ORAI3
m6A-circKIAA0513	miR-339-3p	SEPTIN1
m6A-circKIAA0513	miR-339-3p	GTF3C1
m6A-circKIAA0513	miR-339-3p	IL4R
m6A-circKIAA0513	miR-339-3p	ZC3H7A
m6A-circKIAA0513	miR-339-3p	MCRIP2
m6A-circKIAA0513	miR-339-3p	IFT140
m6A-circKIAA0513	miR-339-3p	SLC9A3R2
m6A-circKIAA0513	miR-7142-3p	FOXS1
m6A-circKIAA0513	miR-7142-3p	METTL25
m6A-circKIAA0513	miR-7142-3p	KCTD15
m6A-circKIAA0513	miR-7142-3p	TRAF3IP3
m6A-circKIAA0513	miR-7142-3p	PEDS1
m6A-circKIAA0513	miR-7142-3p	POLR3B
