# Supplementary material for: Expression Profile and Regulatory Properties of m6A-Modified circRNAs in the Longissimus Dorsi of Queshan Black and Large White Pigs
Source: Animals (Basel). 2023 Jul 4;13(13):2190. doi: 10.3390/ani13132190 (PMC10339870; doi:10.3390/ani13132190)
Supplement: Supplementary file 1 [file animals-13-02190-s001.zip › Supplementary Files/Table S6. List of m6A-circPATJ related ceRNA regulatory networks.xlsx]

## Sheet: Sheet1
m6A-circRNA name	miRNA	gene name
m6A-circPATJ	miR-218-3p	-
m6A-circPATJ	miR-670	-
m6A-circPATJ	miR-138	MKRN1
m6A-circPATJ	miR-138	ZNF514
m6A-circPATJ	miR-138	MOV10
m6A-circPATJ	miR-138	ELAPOR1
m6A-circPATJ	miR-138	VPS8
m6A-circPATJ	miR-138	RDH16
m6A-circPATJ	miR-138	NSF
m6A-circPATJ	miR-138	RWDD3
m6A-circPATJ	miR-138	ST3GAL6
m6A-circPATJ	miR-138	SLC6A8
m6A-circPATJ	miR-138	SPIDR
m6A-circPATJ	miR-138	HMBOX1
m6A-circPATJ	miR-138	PRPF4B
m6A-circPATJ	miR-138	KDM6B
m6A-circPATJ	miR-138	GNAI2
m6A-circPATJ	miR-138	HCN2
m6A-circPATJ	miR-138	ANO10
m6A-circPATJ	miR-138	SSNA1
m6A-circPATJ	miR-138	SULF2
m6A-circPATJ	miR-138	RPS6KA1
m6A-circPATJ	miR-138	PNPLA7
m6A-circPATJ	miR-138	FAM3A
m6A-circPATJ	miR-138	RAB1B
m6A-circPATJ	miR-138	POLR1B
m6A-circPATJ	miR-138	SCARB1
m6A-circPATJ	miR-138	LCLAT1
m6A-circPATJ	miR-138	ITM2C
m6A-circPATJ	miR-138	NKAIN4
m6A-circPATJ	miR-138	MTHFR
m6A-circPATJ	miR-138	ENSSSCG00000012088
m6A-circPATJ	miR-138	PTK2
m6A-circPATJ	miR-138	AMPD2
m6A-circPATJ	miR-138	CLEC7A
m6A-circPATJ	miR-138	ENSSSCG00000017643
m6A-circPATJ	miR-138	ZNF76
m6A-circPATJ	miR-138	P4HB
m6A-circPATJ	miR-138	LIN7B
m6A-circPATJ	miR-138	HPCA
m6A-circPATJ	miR-138	SLC47A2
m6A-circPATJ	miR-138	PWWP2B
m6A-circPATJ	miR-138	GAMT
m6A-circPATJ	miR-138	TMPRSS2
m6A-circPATJ	miR-138	CYB5RL
m6A-circPATJ	miR-138	SLC12A7
m6A-circPATJ	miR-138	ENSSSCG00000052399
m6A-circPATJ	miR-138	LZTS2
m6A-circPATJ	miR-138	SLC16A3
m6A-circPATJ	miR-138	HTRA3
m6A-circPATJ	miR-138	ARHGAP10
m6A-circPATJ	miR-138	ADGRD1
m6A-circPATJ	miR-138	MMRN2
m6A-circPATJ	miR-138	MFSD13A
m6A-circPATJ	miR-138	FUOM
m6A-circPATJ	miR-138	NOL6
m6A-circPATJ	miR-138	KEAP1
m6A-circPATJ	miR-138	ATG4D
m6A-circPATJ	miR-138	TNP1
m6A-circPATJ	miR-138	TRPV6
m6A-circPATJ	miR-138	USP18
m6A-circPATJ	miR-138	DEF6
m6A-circPATJ	miR-138	WDR59
m6A-circPATJ	miR-138	CHST4
m6A-circPATJ	miR-138	IRX6
m6A-circPATJ	miR-138	RNF207
m6A-circPATJ	miR-138	ARHGEF19
m6A-circPATJ	miR-138	C8B
m6A-circPATJ	miR-138	ADGB
m6A-circPATJ	miR-138	SMPD2
m6A-circPATJ	miR-138	ADAL
m6A-circPATJ	miR-138	CRABP2
m6A-circPATJ	miR-138	FAM189B
m6A-circPATJ	miR-138	GCNT7
m6A-circPATJ	miR-138	BCKDK
m6A-circPATJ	miR-138	SEPTIN1
m6A-circPATJ	miR-138	SNRNP25
m6A-circPATJ	miR-145-5p	CAPZB
m6A-circPATJ	miR-145-5p	SPECC1
m6A-circPATJ	miR-145-5p	ENSSSCG00000004001
m6A-circPATJ	miR-145-5p	ENSSSCG00000021767
m6A-circPATJ	miR-145-5p	BACE1
m6A-circPATJ	miR-145-5p	EPB41
m6A-circPATJ	miR-145-5p	AMMECR1L
m6A-circPATJ	miR-145-5p	DLL4
m6A-circPATJ	miR-145-5p	DVL2
m6A-circPATJ	miR-145-5p	DRD2
m6A-circPATJ	miR-145-5p	IFNG
m6A-circPATJ	miR-145-5p	ISY1
m6A-circPATJ	miR-145-5p	CCDC28B
m6A-circPATJ	miR-145-5p	RTKN
m6A-circPATJ	miR-145-5p	ZNF786
m6A-circPATJ	miR-145-5p	SORL1
m6A-circPATJ	miR-145-5p	ASB1
m6A-circPATJ	miR-145-5p	VPS37A
m6A-circPATJ	miR-145-5p	EXOC7
m6A-circPATJ	miR-145-5p	MTSS2
m6A-circPATJ	miR-145-5p	NCAPG2
m6A-circPATJ	miR-145-5p	REEP1
m6A-circPATJ	miR-145-5p	MYOM3
m6A-circPATJ	miR-145-5p	FAM135B
m6A-circPATJ	miR-145-5p	SYNE3
m6A-circPATJ	miR-145-5p	MSX2
m6A-circPATJ	miR-145-5p	SPATA6L
m6A-circPATJ	miR-145-5p	PODN
m6A-circPATJ	miR-145-5p	ENSSSCG00000013976
m6A-circPATJ	miR-145-5p	DENND4B
m6A-circPATJ	miR-145-5p	ARHGAP24
m6A-circPATJ	miR-145-5p	DGAT1
m6A-circPATJ	miR-145-5p	ARPIN
m6A-circPATJ	miR-145-5p	ENSSSCG00000006395
m6A-circPATJ	miR-145-5p	ZKSCAN1
m6A-circPATJ	miR-145-5p	ENSSSCG00000036877
m6A-circPATJ	miR-145-5p	MISP
m6A-circPATJ	miR-145-5p	DAGLA
m6A-circPATJ	miR-145-5p	RPP40
m6A-circPATJ	miR-145-5p	EPN1
m6A-circPATJ	miR-145-5p	CDS2
m6A-circPATJ	miR-145-5p	ZDHHC3
m6A-circPATJ	miR-145-5p	HCRTR1
m6A-circPATJ	miR-145-5p	CXCL12
m6A-circPATJ	miR-145-5p	PNPO
m6A-circPATJ	miR-145-5p	CHRNB2
m6A-circPATJ	miR-145-5p	LY6G6D
m6A-circPATJ	miR-145-5p	UCK2
m6A-circPATJ	miR-145-5p	DAG1
m6A-circPATJ	miR-145-5p	BRSK1
m6A-circPATJ	miR-145-5p	SMARCC2
m6A-circPATJ	miR-145-5p	SLC41A3
m6A-circPATJ	miR-145-5p	RASAL2
m6A-circPATJ	miR-145-5p	FGFR3
m6A-circPATJ	miR-145-5p	STARD8
m6A-circPATJ	miR-145-5p	GDAP1
m6A-circPATJ	miR-145-5p	GLYR1
m6A-circPATJ	miR-145-5p	ENSSSCG00000016475
m6A-circPATJ	miR-145-5p	GUCD1
m6A-circPATJ	miR-145-5p	NEIL1
m6A-circPATJ	miR-145-5p	SPAG8
m6A-circPATJ	miR-145-5p	ERCC2
m6A-circPATJ	miR-145-5p	HYAL2
m6A-circPATJ	miR-145-5p	PYM1
m6A-circPATJ	miR-145-5p	PNO1
m6A-circPATJ	miR-145-5p	GDNF
m6A-circPATJ	miR-145-5p	ENSSSCG00000005311
m6A-circPATJ	miR-145-5p	GSTZ1
m6A-circPATJ	miR-145-5p	CD6
m6A-circPATJ	miR-145-5p	LTA
m6A-circPATJ	miR-145-5p	C17orf67
m6A-circPATJ	miR-145-5p	IFIT3
m6A-circPATJ	miR-145-5p	SIAH2
m6A-circPATJ	miR-145-5p	CA14
m6A-circPATJ	miR-145-5p	MDFI
m6A-circPATJ	miR-145-5p	ZFP36L1
m6A-circPATJ	miR-145-5p	NDRG4
m6A-circPATJ	miR-145-5p	AMBRA1
m6A-circPATJ	miR-145-5p	NARF
m6A-circPATJ	miR-145-5p	DLG4
m6A-circPATJ	miR-145-5p	ENSSSCG00000026653
m6A-circPATJ	miR-145-5p	TAF8
m6A-circPATJ	miR-145-5p	STX5
m6A-circPATJ	miR-145-5p	ENSSSCG00000035224
m6A-circPATJ	miR-145-5p	A4GNT
m6A-circPATJ	miR-145-5p	GFOD2
m6A-circPATJ	miR-145-5p	SLC49A3
m6A-circPATJ	miR-145-5p	FDXACB1
m6A-circPATJ	miR-145-5p	A4GALT
m6A-circPATJ	miR-145-5p	ENSSSCG00000027428
m6A-circPATJ	miR-145-5p	XPO7
m6A-circPATJ	miR-145-5p	ENSSSCG00000029803
m6A-circPATJ	miR-145-5p	FKBP9
m6A-circPATJ	miR-145-5p	MRPL35
m6A-circPATJ	miR-145-5p	POP5
m6A-circPATJ	miR-145-5p	SLC26A6
m6A-circPATJ	miR-145-5p	HDAC8
m6A-circPATJ	miR-145-5p	PPP1CA
m6A-circPATJ	miR-145-5p	TMEM151A
m6A-circPATJ	miR-145-5p	ENSSSCG00000058512
m6A-circPATJ	miR-145-5p	ABTB2
m6A-circPATJ	miR-145-5p	TJP3
m6A-circPATJ	miR-145-5p	PRKCSH
m6A-circPATJ	miR-145-5p	TPM4
m6A-circPATJ	miR-145-5p	TCOF1
m6A-circPATJ	miR-145-5p	GNAI1
m6A-circPATJ	miR-145-5p	TATDN3
m6A-circPATJ	miR-145-5p	COL4A3
m6A-circPATJ	miR-145-5p	MOCS2
m6A-circPATJ	miR-145-5p	LMBR1L
m6A-circPATJ	miR-145-5p	FITM1
m6A-circPATJ	miR-145-5p	RPS6KL1
m6A-circPATJ	miR-145-5p	MARVELD3
m6A-circPATJ	miR-145-5p	RPS11
m6A-circPATJ	miR-145-5p	GRHL3
m6A-circPATJ	miR-145-5p	THRAP3
m6A-circPATJ	miR-145-5p	ZFYVE9
m6A-circPATJ	miR-145-5p	CTIF
m6A-circPATJ	miR-145-5p	IGF1R
m6A-circPATJ	miR-145-5p	STYXL2
m6A-circPATJ	miR-145-5p	S100A14
m6A-circPATJ	miR-145-5p	CD2BP2
m6A-circPATJ	miR-145-5p	SLX4
m6A-circPATJ	miR-145-5p	FBXL16
m6A-circPATJ	miR-145-5p	CHCHD5
m6A-circPATJ	miR-30e-3p	PDXDC1
m6A-circPATJ	miR-30e-3p	ARMCX2
m6A-circPATJ	miR-30e-3p	GEMIN6
m6A-circPATJ	miR-30e-3p	CYP39A1
m6A-circPATJ	miR-30e-3p	TPBG
