# Supplementary material for: Expression Profile and Regulatory Properties of m6A-Modified circRNAs in the Longissimus Dorsi of Queshan Black and Large White Pigs
Source: Animals (Basel). 2023 Jul 4;13(13):2190. doi: 10.3390/ani13132190 (PMC10339870; doi:10.3390/ani13132190)
Supplement: Supplementary file 1 [file animals-13-02190-s001.zip › Supplementary Files/Table S7. List of m6A-circRNASEH1 related ceRNA regulatory networks.xlsx]

## Sheet: Sheet1
m6A-circRNA name	miRNA	gene name
m6A-circRNASEH1	miR-9-2	-
m6A-circRNASEH1	miR-7140-3p	DHRS7C
m6A-circRNASEH1	miR-7140-3p	KIAA0100
m6A-circRNASEH1	miR-7140-3p	DENND6B
m6A-circRNASEH1	miR-7140-3p	TAOK2
m6A-circRNASEH1	miR-7140-3p	PLD3
m6A-circRNASEH1	miR-7140-3p	CDC42EP2
m6A-circRNASEH1	miR-7140-3p	ENSSSCG00000046886
m6A-circRNASEH1	miR-7140-3p	ZFAT
m6A-circRNASEH1	miR-7140-3p	FTCD
m6A-circRNASEH1	miR-7140-3p	ATP4B
m6A-circRNASEH1	miR-7140-3p	CUL1
m6A-circRNASEH1	miR-7140-3p	ENSSSCG00000037632
m6A-circRNASEH1	miR-7140-3p	ENSSSCG00000003903
m6A-circRNASEH1	miR-7140-3p	TRPM3
m6A-circRNASEH1	miR-9	FAM228B
m6A-circRNASEH1	miR-9-1	FAM228B
