# Supplementary material for: Expression Profile and Regulatory Properties of m6A-Modified circRNAs in the Longissimus Dorsi of Queshan Black and Large White Pigs
Source: Animals (Basel). 2023 Jul 4;13(13):2190. doi: 10.3390/ani13132190 (PMC10339870; doi:10.3390/ani13132190)
Supplement: Supplementary file 1 [file animals-13-02190-s001.zip › Supplementary Files/Table S8. List of m6A-circSETBP1 related ceRNA regulatory networks.xlsx]

## Sheet: Sheet1
m6A-circRNA name	miRNA	gene name
m6A-circSETBP1	miR-10387	-
m6A-circSETBP1	miR-146a-3p	-
m6A-circSETBP1	miR-149	TNS3
m6A-circSETBP1	miR-149	KAT5
m6A-circSETBP1	miR-149	RABEP2
m6A-circSETBP1	miR-149	EXOC2
m6A-circSETBP1	miR-149	SPECC1
m6A-circSETBP1	miR-149	METTL7B
m6A-circSETBP1	miR-149	RAP1GAP2
m6A-circSETBP1	miR-149	OGDH
m6A-circSETBP1	miR-149	KIF26A
m6A-circSETBP1	miR-149	KRT78
m6A-circSETBP1	miR-149	MINK1
m6A-circSETBP1	miR-149	GSG1L
m6A-circSETBP1	miR-149	CHPF2
m6A-circSETBP1	miR-149	KIAA0930
m6A-circSETBP1	miR-149	ASPG
m6A-circSETBP1	miR-149	PDAP1
m6A-circSETBP1	miR-149	ARRDC1
m6A-circSETBP1	miR-149	TAFA5
m6A-circSETBP1	miR-149	KCNA2
m6A-circSETBP1	miR-149	TPCN1
m6A-circSETBP1	miR-149	PHF21A
m6A-circSETBP1	miR-149	EPB41
m6A-circSETBP1	miR-149	ADAM33
m6A-circSETBP1	miR-149	ARFGAP1
m6A-circSETBP1	miR-149	RCOR2
m6A-circSETBP1	miR-149	CARD11
m6A-circSETBP1	miR-149	CFLAR
m6A-circSETBP1	miR-149	MEIS1
m6A-circSETBP1	miR-149	TSEN54
m6A-circSETBP1	miR-149	HSF1
m6A-circSETBP1	miR-149	ADD1
m6A-circSETBP1	miR-149	CGA
m6A-circSETBP1	miR-149	RANBP2
m6A-circSETBP1	miR-149	RGS19
m6A-circSETBP1	miR-149	MFSD10
m6A-circSETBP1	miR-149	FBXO6
m6A-circSETBP1	miR-149	B4GALNT1
m6A-circSETBP1	miR-149	REX1BD
m6A-circSETBP1	miR-149	REXO1
m6A-circSETBP1	miR-149	AIF1L
m6A-circSETBP1	miR-149	CALHM2
m6A-circSETBP1	miR-149	ABHD2
m6A-circSETBP1	miR-149	MYADML2
m6A-circSETBP1	miR-149	RPL3
m6A-circSETBP1	miR-149	FDXR
m6A-circSETBP1	miR-149	TRAP1
m6A-circSETBP1	miR-149	ZNF444
m6A-circSETBP1	miR-149	TSPAN9
m6A-circSETBP1	miR-149	HHATL
m6A-circSETBP1	miR-149	OAS2
m6A-circSETBP1	miR-149	RNF4
m6A-circSETBP1	miR-149	ENSSSCG00000035224
m6A-circSETBP1	miR-149	SURF4
m6A-circSETBP1	miR-149	GAB2
m6A-circSETBP1	miR-149	CCDC69
m6A-circSETBP1	miR-149	DNAJB1
m6A-circSETBP1	miR-149	PTH1R
m6A-circSETBP1	miR-149	PVALB
m6A-circSETBP1	miR-149	SH3BP4
m6A-circSETBP1	miR-149	RBCK1
m6A-circSETBP1	miR-149	ENSSSCG00000002993
m6A-circSETBP1	miR-149	GPAT3
m6A-circSETBP1	miR-149	GPRC5A
m6A-circSETBP1	miR-149	ENSSSCG00000034286
m6A-circSETBP1	miR-149	SMPD3
m6A-circSETBP1	miR-149	ARHGEF2
m6A-circSETBP1	miR-149	NUP98
m6A-circSETBP1	miR-149	RASA3
m6A-circSETBP1	miR-149	PGLYRP1
m6A-circSETBP1	miR-149	NUMBL
m6A-circSETBP1	miR-149	SLC29A1
m6A-circSETBP1	miR-149	DNAJC18
m6A-circSETBP1	miR-149	YBEY
m6A-circSETBP1	miR-149	COPG2
m6A-circSETBP1	miR-149	DUSP18
m6A-circSETBP1	miR-149	TTLL3
m6A-circSETBP1	miR-149	PICK1
m6A-circSETBP1	miR-149	ID1
m6A-circSETBP1	miR-149	STK38
m6A-circSETBP1	miR-149	ROM1
m6A-circSETBP1	miR-149	AGRN
m6A-circSETBP1	miR-149	DNAAF3
m6A-circSETBP1	miR-149	TNIP1
m6A-circSETBP1	miR-149	GADD45GIP1
m6A-circSETBP1	miR-149	CHMP7
m6A-circSETBP1	miR-149	GPR37L1
m6A-circSETBP1	miR-149	MYOM2
m6A-circSETBP1	miR-149	LHFPL6
m6A-circSETBP1	miR-149	TOM1
m6A-circSETBP1	miR-149	UBE3B
m6A-circSETBP1	miR-149	ISY1
m6A-circSETBP1	miR-149	BSCL2
m6A-circSETBP1	miR-149	ADGRB2
m6A-circSETBP1	miR-149	PTPRH
m6A-circSETBP1	miR-149	MKNK1
m6A-circSETBP1	miR-149	DTYMK
m6A-circSETBP1	miR-149	PI4KB
m6A-circSETBP1	miR-149	PDZK1
m6A-circSETBP1	miR-149	ENSSSCG00000039557
m6A-circSETBP1	miR-149	SWI5
m6A-circSETBP1	miR-149	PLA2G2F
m6A-circSETBP1	miR-149	ENSSSCG00000052916
m6A-circSETBP1	miR-149	ARAP3
m6A-circSETBP1	miR-149	SLC2A4RG
m6A-circSETBP1	miR-149	VSIG10
m6A-circSETBP1	miR-149	SREBF2
m6A-circSETBP1	miR-149	BRF1
m6A-circSETBP1	miR-149	ENSSSCG00000040342
m6A-circSETBP1	miR-149	PTPN5
m6A-circSETBP1	miR-149	VASH1
m6A-circSETBP1	miR-149	CYB561D1
m6A-circSETBP1	miR-149	DLG4
m6A-circSETBP1	miR-149	TMEM125
m6A-circSETBP1	miR-149	FSTL3
m6A-circSETBP1	miR-149	SLC13A3
m6A-circSETBP1	miR-149	CSRP1
m6A-circSETBP1	miR-149	ADGRG5
m6A-circSETBP1	miR-149	ZBTB45
m6A-circSETBP1	miR-149	TIFAB
m6A-circSETBP1	miR-149	FAM53B
m6A-circSETBP1	miR-149	NDST1
m6A-circSETBP1	miR-149	CDHR5
m6A-circSETBP1	miR-149	EXOC7
m6A-circSETBP1	miR-149	ENSSSCG00000036988
m6A-circSETBP1	miR-149	CHD4
m6A-circSETBP1	miR-149	MRO
m6A-circSETBP1	miR-149	FBXO17
m6A-circSETBP1	miR-149	LMNA
m6A-circSETBP1	miR-149	DYNC1H1
m6A-circSETBP1	miR-149	GRHL3
m6A-circSETBP1	miR-149	SPINK14
m6A-circSETBP1	miR-149	MYDGF
m6A-circSETBP1	miR-149	RASL10B
m6A-circSETBP1	miR-149	PHLDB3
m6A-circSETBP1	miR-149	TSC2
m6A-circSETBP1	miR-149	VIPR2
m6A-circSETBP1	miR-149	CYTH1
m6A-circSETBP1	miR-149	LGMN
m6A-circSETBP1	miR-149	LRRC20
m6A-circSETBP1	miR-149	S1PR1
m6A-circSETBP1	miR-149	RDH13
m6A-circSETBP1	miR-149	WNT6
m6A-circSETBP1	miR-149	NUAK1
m6A-circSETBP1	miR-149	ZNF239
m6A-circSETBP1	miR-149	UBOX5
m6A-circSETBP1	miR-149	SLC25A11
m6A-circSETBP1	miR-149	PRKCSH
m6A-circSETBP1	miR-149	ZC3HAV1
m6A-circSETBP1	miR-149	ENSSSCG00000053708
m6A-circSETBP1	miR-149	DPP7
m6A-circSETBP1	miR-149	BCL2L1
m6A-circSETBP1	miR-149	RGR
m6A-circSETBP1	miR-149	LMBR1L
m6A-circSETBP1	miR-149	BICDL2
m6A-circSETBP1	miR-149	VOPP1
m6A-circSETBP1	miR-149	SMARCD3
m6A-circSETBP1	miR-149	PRPF31
m6A-circSETBP1	miR-149	ENSSSCG00000033720
m6A-circSETBP1	miR-149	DGAT1
m6A-circSETBP1	miR-149	ZNF664
m6A-circSETBP1	miR-149	ELMOD3
m6A-circSETBP1	miR-149	ENSSSCG00000036022
m6A-circSETBP1	miR-149	GPX4
m6A-circSETBP1	miR-149	LIMA1
m6A-circSETBP1	miR-149	NBEAL2
m6A-circSETBP1	miR-149	CTSD
m6A-circSETBP1	miR-149	VPS9D1
m6A-circSETBP1	miR-149	ARVCF
m6A-circSETBP1	miR-149	CREBL2
m6A-circSETBP1	miR-149	SHISA9
m6A-circSETBP1	miR-149	TRIM62
m6A-circSETBP1	miR-149	EMC10
m6A-circSETBP1	miR-149	ENSSSCG00000034188
m6A-circSETBP1	miR-149	PLA1A
m6A-circSETBP1	miR-149	AXIN1
m6A-circSETBP1	miR-149	GIPC1
m6A-circSETBP1	miR-149	SHISA5
m6A-circSETBP1	miR-149	PISD
m6A-circSETBP1	miR-149	TEDC2
m6A-circSETBP1	miR-149	TMEM164
m6A-circSETBP1	miR-149	SYT7
m6A-circSETBP1	miR-149	TRIM28
m6A-circSETBP1	miR-149	NCDN
m6A-circSETBP1	miR-149	ENSSSCG00000036109
m6A-circSETBP1	miR-149	PYGM
m6A-circSETBP1	miR-149	FAM3B
m6A-circSETBP1	miR-149	PDPK1
m6A-circSETBP1	miR-149	SWSAP1
m6A-circSETBP1	miR-149	ARHGDIA
m6A-circSETBP1	miR-149	ERCC2
m6A-circSETBP1	miR-149	ARL3
m6A-circSETBP1	miR-149	PCDHGA4
m6A-circSETBP1	miR-149	TOR1A
m6A-circSETBP1	miR-149	PLD3
m6A-circSETBP1	miR-149	REEP2
m6A-circSETBP1	miR-149	SCO1
m6A-circSETBP1	miR-149	TBC1D20
m6A-circSETBP1	miR-149	CLUH
m6A-circSETBP1	miR-149	NF2
m6A-circSETBP1	miR-149	MTMR14
m6A-circSETBP1	miR-149	SENP3
m6A-circSETBP1	miR-149	ARHGAP22
m6A-circSETBP1	miR-149	LY6H
m6A-circSETBP1	miR-149	IFITM10
m6A-circSETBP1	miR-149	ENSSSCG00000040849
m6A-circSETBP1	miR-149	SLC12A5
m6A-circSETBP1	miR-149	METTL27
m6A-circSETBP1	miR-149	CCND1
m6A-circSETBP1	miR-149	BCL2L2
m6A-circSETBP1	miR-149	FASTK
m6A-circSETBP1	miR-149	RPAP1
m6A-circSETBP1	miR-149	ENSSSCG00000035561
m6A-circSETBP1	miR-149	SH3BP2
m6A-circSETBP1	miR-149	PNPO
m6A-circSETBP1	miR-149	RNF145
m6A-circSETBP1	miR-149	FARSA
m6A-circSETBP1	miR-149	RAB15
m6A-circSETBP1	miR-149	ABHD14B
m6A-circSETBP1	miR-149	ROBO3
m6A-circSETBP1	miR-149	EMILIN1
m6A-circSETBP1	miR-149	UCKL1
m6A-circSETBP1	miR-149	SRL
m6A-circSETBP1	miR-149	TP53I11
m6A-circSETBP1	miR-149	DNAJB2
m6A-circSETBP1	miR-149	ENSSSCG00000013150
m6A-circSETBP1	miR-149	OTUD3
m6A-circSETBP1	miR-149	ENSSSCG00000033721
m6A-circSETBP1	miR-149	GPR55
m6A-circSETBP1	miR-149	SPOUT1
m6A-circSETBP1	miR-149	STMN3
m6A-circSETBP1	miR-149	ENSSSCG00000062259
m6A-circSETBP1	miR-149	ACP2
m6A-circSETBP1	miR-149	TALDO1
m6A-circSETBP1	miR-149	C14orf132
m6A-circSETBP1	miR-149	IKBKG
m6A-circSETBP1	miR-149	SPDEF
m6A-circSETBP1	miR-149	D2HGDH
m6A-circSETBP1	miR-149	DBNL
m6A-circSETBP1	miR-149	WDR74
m6A-circSETBP1	miR-149	GET3
m6A-circSETBP1	miR-149	HMOX1
m6A-circSETBP1	miR-149	KRT8
m6A-circSETBP1	miR-149	ECI1
m6A-circSETBP1	miR-149	ALKBH5
m6A-circSETBP1	miR-149	NSDHL
m6A-circSETBP1	miR-149	HGFAC
m6A-circSETBP1	miR-149	PDXP
m6A-circSETBP1	miR-149	MLLT6
m6A-circSETBP1	miR-149	TRMT61A
m6A-circSETBP1	miR-149	CD247
m6A-circSETBP1	miR-149	MYO1D
m6A-circSETBP1	miR-149	SLC27A4
m6A-circSETBP1	miR-149	ELOVL5
m6A-circSETBP1	miR-149	ENSSSCG00000002963
m6A-circSETBP1	miR-149	RAB43
m6A-circSETBP1	miR-149	GBX1
m6A-circSETBP1	miR-149	GAS7
m6A-circSETBP1	miR-149	PSMD13
m6A-circSETBP1	miR-149	ZFYVE27
m6A-circSETBP1	miR-149	DPM2
m6A-circSETBP1	miR-149	NAPRT
m6A-circSETBP1	miR-149	JMJD8
m6A-circSETBP1	miR-149	SPPL2B
m6A-circSETBP1	miR-149	NOS3
m6A-circSETBP1	miR-149	KIAA0513
m6A-circSETBP1	miR-149	IL22RA1
m6A-circSETBP1	miR-149	PLEKHN1
m6A-circSETBP1	miR-149	SACS
m6A-circSETBP1	miR-149	PGPEP1
m6A-circSETBP1	miR-149	DDIT4
m6A-circSETBP1	miR-149	TAOK2
m6A-circSETBP1	miR-149	MAFG
m6A-circSETBP1	miR-149	RANBP3
m6A-circSETBP1	miR-149	OSBPL5
m6A-circSETBP1	miR-149	ELL
m6A-circSETBP1	miR-149	MMP14
m6A-circSETBP1	miR-149	MAP7D1
m6A-circSETBP1	miR-149	FBXO2
m6A-circSETBP1	miR-149	ENSSSCG00000031155
m6A-circSETBP1	miR-149	SYNGR2
m6A-circSETBP1	miR-149	BBS1
m6A-circSETBP1	miR-149	MAP3K3
m6A-circSETBP1	miR-149	ACACA
m6A-circSETBP1	miR-149	NOXA1
m6A-circSETBP1	miR-149	NKAIN4
m6A-circSETBP1	miR-149	ACTB
m6A-circSETBP1	miR-149	BEND5
m6A-circSETBP1	miR-149	NBL1
m6A-circSETBP1	miR-149	BRD3
m6A-circSETBP1	miR-149	MAPT
m6A-circSETBP1	miR-149	LSM14B
m6A-circSETBP1	miR-149	NEUROD2
m6A-circSETBP1	miR-149	ABHD8
m6A-circSETBP1	miR-149	ENSSSCG00000026817
m6A-circSETBP1	miR-149	MMP28
m6A-circSETBP1	miR-149	ENSSSCG00000001696
m6A-circSETBP1	miR-149	RBPMS
m6A-circSETBP1	miR-149	FBF1
m6A-circSETBP1	miR-149	SLC35C2
m6A-circSETBP1	miR-149	CHD2
m6A-circSETBP1	miR-149	MUTYH
m6A-circSETBP1	miR-149	LRFN4
m6A-circSETBP1	miR-149	WNT7B
m6A-circSETBP1	miR-149	ANKRD52
m6A-circSETBP1	miR-149	CCL8
m6A-circSETBP1	miR-149	DOCK2
m6A-circSETBP1	miR-149	ARF3
m6A-circSETBP1	miR-149	KLHL29
m6A-circSETBP1	miR-149	TRIB3
m6A-circSETBP1	miR-149	THEM6
m6A-circSETBP1	miR-149	ENSSSCG00000009293
m6A-circSETBP1	miR-149	ENSSSCG00000013842
m6A-circSETBP1	miR-149	DMWD
m6A-circSETBP1	miR-149	COL18A1
m6A-circSETBP1	miR-149	FOXP3
m6A-circSETBP1	miR-149	ENSSSCG00000005311
m6A-circSETBP1	miR-149	ILF3
m6A-circSETBP1	miR-149	G0S2
m6A-circSETBP1	miR-149	GABBR1
m6A-circSETBP1	miR-149	ENSSSCG00000006588
m6A-circSETBP1	miR-149	MAVS
m6A-circSETBP1	miR-149	MCAM
m6A-circSETBP1	miR-149	PDZD11
m6A-circSETBP1	miR-149	ENSSSCG00000005908
m6A-circSETBP1	miR-149	PDGFRB
m6A-circSETBP1	miR-149	TMEM63B
m6A-circSETBP1	miR-149	ITGB3
m6A-circSETBP1	miR-149	KDR
m6A-circSETBP1	miR-149	PFKFB3
m6A-circSETBP1	miR-149	ARHGEF37
m6A-circSETBP1	miR-149	HYAL1
m6A-circSETBP1	miR-149	PPP2R3B
m6A-circSETBP1	miR-149	MSRB1
m6A-circSETBP1	miR-149	CASTOR2
m6A-circSETBP1	miR-149	TCF3
m6A-circSETBP1	miR-149	ENSSSCG00000040711
m6A-circSETBP1	miR-149	ENSSSCG00000033735
m6A-circSETBP1	miR-149	CAVIN1
m6A-circSETBP1	miR-149	GPR68
m6A-circSETBP1	miR-149	RHBG
m6A-circSETBP1	miR-149	RNF220
m6A-circSETBP1	miR-149	CALCOCO1
m6A-circSETBP1	miR-149	MOGS
m6A-circSETBP1	miR-149	ITIH4
m6A-circSETBP1	miR-149	DNAI1
m6A-circSETBP1	miR-149	NOC2L
m6A-circSETBP1	miR-149	PKP1
m6A-circSETBP1	miR-149	USP22
m6A-circSETBP1	miR-149	AKAP10
m6A-circSETBP1	miR-149	SPART
m6A-circSETBP1	miR-149	DMAP1
m6A-circSETBP1	miR-149	TBX6
m6A-circSETBP1	miR-149	ENSSSCG00000007932
m6A-circSETBP1	miR-149	BCKDHA
m6A-circSETBP1	miR-149	ASB13
m6A-circSETBP1	miR-149	CLDN2
m6A-circSETBP1	miR-149	ENSSSCG00000061743
m6A-circSETBP1	miR-149	FUT7
m6A-circSETBP1	miR-149	C15orf62
m6A-circSETBP1	miR-149	COL6A3
m6A-circSETBP1	miR-149	SLC38A3
m6A-circSETBP1	miR-149	CD22
m6A-circSETBP1	miR-149	PEX14
m6A-circSETBP1	miR-149	CAMKK2
m6A-circSETBP1	miR-149	KCNT1
m6A-circSETBP1	miR-149	APLNR
m6A-circSETBP1	miR-149	ALKBH7
m6A-circSETBP1	miR-149	ZBTB17
m6A-circSETBP1	miR-149	HSD17B2
m6A-circSETBP1	miR-149	PLEKHA7
m6A-circSETBP1	miR-149	CPNE9
m6A-circSETBP1	miR-149	MAPK7
m6A-circSETBP1	miR-149	LPCAT1
m6A-circSETBP1	miR-149	BAIAP2
m6A-circSETBP1	miR-149	ENDOV
m6A-circSETBP1	miR-149	UNK
m6A-circSETBP1	miR-149	OTOP3
m6A-circSETBP1	miR-149	NAT9
m6A-circSETBP1	miR-149	CYB561
m6A-circSETBP1	miR-149	MRC2
m6A-circSETBP1	miR-149	FMNL1
m6A-circSETBP1	miR-149	PLCD3
m6A-circSETBP1	miR-149	TMEM101
m6A-circSETBP1	miR-149	COASY
m6A-circSETBP1	miR-149	CNP
m6A-circSETBP1	miR-149	CCR7
m6A-circSETBP1	miR-149	TCAP
m6A-circSETBP1	miR-149	ENSSSCG00000017515
m6A-circSETBP1	miR-149	ZNF652
m6A-circSETBP1	miR-149	XYLT2
m6A-circSETBP1	miR-149	MYBBP1A
m6A-circSETBP1	miR-149	ACADVL
m6A-circSETBP1	miR-149	WRAP53
m6A-circSETBP1	miR-149	SLC5A10
m6A-circSETBP1	miR-149	ORAI2
m6A-circSETBP1	miR-149	COPS9
m6A-circSETBP1	miR-149	ENSSSCG00000026653
m6A-circSETBP1	miR-149	NEIL2
m6A-circSETBP1	miR-149	SUSD2
m6A-circSETBP1	miR-149	TMEM54
m6A-circSETBP1	miR-149	MMP17
m6A-circSETBP1	miR-149	B3GAT3
m6A-circSETBP1	miR-149	BPIFB6
m6A-circSETBP1	miR-149	EPHB3
m6A-circSETBP1	miR-149	ENSSSCG00000005643
m6A-circSETBP1	miR-149	SAP30BP
m6A-circSETBP1	miR-149	CDK10
m6A-circSETBP1	miR-149	ENSSSCG00000016191
m6A-circSETBP1	miR-149	DOK4
m6A-circSETBP1	miR-149	ENSSSCG00000020777
m6A-circSETBP1	miR-149	ENSSSCG00000001616
m6A-circSETBP1	miR-149	ABCB8
m6A-circSETBP1	miR-149	CATSPER4
m6A-circSETBP1	miR-149	ZNF692
m6A-circSETBP1	miR-149	SLC22A7
m6A-circSETBP1	miR-149	DCAF6
m6A-circSETBP1	miR-149	PIAS4
m6A-circSETBP1	miR-149	MUSK
m6A-circSETBP1	miR-149	VSTM2B
m6A-circSETBP1	miR-149	PDE9A
m6A-circSETBP1	miR-149	SLC30A2
m6A-circSETBP1	miR-149	FSCN1
m6A-circSETBP1	miR-149	MRAS
m6A-circSETBP1	miR-149	FASLG
m6A-circSETBP1	miR-149	PEDS1
m6A-circSETBP1	miR-149	SCN1B
m6A-circSETBP1	miR-149	PTGIR
m6A-circSETBP1	miR-149	RRBP1
m6A-circSETBP1	miR-149	PCBP4
m6A-circSETBP1	miR-149	KLHL30
m6A-circSETBP1	miR-149	ZFR2
m6A-circSETBP1	miR-149	ZBTB47
m6A-circSETBP1	miR-149	TBC1D2B
m6A-circSETBP1	miR-149	CSF2
m6A-circSETBP1	miR-149	CBFA2T2
m6A-circSETBP1	miR-149	MPPE1
m6A-circSETBP1	miR-149	KIFC2
m6A-circSETBP1	miR-149	SNX20
m6A-circSETBP1	miR-149	NAV2
m6A-circSETBP1	miR-149	USP39
m6A-circSETBP1	miR-149	RRP1B
m6A-circSETBP1	miR-149	MPPED1
m6A-circSETBP1	miR-149	PAQR7
m6A-circSETBP1	miR-149	ZMIZ2
m6A-circSETBP1	miR-149	ADAMTSL2
m6A-circSETBP1	miR-149	LZTS2
m6A-circSETBP1	miR-149	FAM193A
m6A-circSETBP1	miR-149	NDUFB10
m6A-circSETBP1	miR-149	CYB5RL
m6A-circSETBP1	miR-149	NOP56
m6A-circSETBP1	miR-149	ENSSSCG00000026302
m6A-circSETBP1	miR-149	LDHD
m6A-circSETBP1	miR-149	SEPTIN10
m6A-circSETBP1	miR-149	FHIP1A
m6A-circSETBP1	miR-149	SCARF1
m6A-circSETBP1	miR-149	INPP5K
m6A-circSETBP1	miR-149	GIGYF1
m6A-circSETBP1	miR-149	GDF5
m6A-circSETBP1	miR-149	SPOP
m6A-circSETBP1	miR-149	HS6ST1
m6A-circSETBP1	miR-149	NYAP1
m6A-circSETBP1	miR-149	MYMK
m6A-circSETBP1	miR-149	ELP5
m6A-circSETBP1	miR-149	BYSL
m6A-circSETBP1	miR-149	NKIRAS2
m6A-circSETBP1	miR-149	PPP1R12C
m6A-circSETBP1	miR-149	KLHL17
m6A-circSETBP1	miR-149	WIZ
m6A-circSETBP1	miR-149	TBX2
m6A-circSETBP1	miR-149	PLCH2
m6A-circSETBP1	miR-149	ENSSSCG00000025499
m6A-circSETBP1	miR-149	TLE2
m6A-circSETBP1	miR-149	ENSSSCG00000021891
m6A-circSETBP1	miR-149	SMARCC2
m6A-circSETBP1	miR-149	TRIP10
m6A-circSETBP1	miR-149	PRADC1
m6A-circSETBP1	miR-149	PIGF
m6A-circSETBP1	miR-149	PDIA6
m6A-circSETBP1	miR-149	IAH1
m6A-circSETBP1	miR-149	RGS12
m6A-circSETBP1	miR-149	MANBA
m6A-circSETBP1	miR-149	BMP1
m6A-circSETBP1	miR-149	RHOBTB2
m6A-circSETBP1	miR-149	MORN3
m6A-circSETBP1	miR-149	SRRM4
m6A-circSETBP1	miR-149	SCARF2
m6A-circSETBP1	miR-149	TANGO2
m6A-circSETBP1	miR-149	ZDHHC8
m6A-circSETBP1	miR-149	TYSND1
m6A-circSETBP1	miR-149	ENSSSCG00000010280
m6A-circSETBP1	miR-149	ENSSSCG00000061845
m6A-circSETBP1	miR-149	MFSD13A
m6A-circSETBP1	miR-149	PALB2
m6A-circSETBP1	miR-149	FBP2
m6A-circSETBP1	miR-149	ITIH5
m6A-circSETBP1	miR-149	ZNF385D
m6A-circSETBP1	miR-149	CISH
m6A-circSETBP1	miR-149	POC1A
m6A-circSETBP1	miR-149	DUSP7
m6A-circSETBP1	miR-149	TNNC1
m6A-circSETBP1	miR-149	VEPH1
m6A-circSETBP1	miR-149	MELTF
m6A-circSETBP1	miR-149	SEMA5B
m6A-circSETBP1	miR-149	CHAF1B
m6A-circSETBP1	miR-149	IQSEC2
m6A-circSETBP1	miR-149	ABCD1
m6A-circSETBP1	miR-149	AVPR2
m6A-circSETBP1	miR-149	FUNDC2
m6A-circSETBP1	miR-149	SLC25A22
m6A-circSETBP1	miR-149	NADSYN1
m6A-circSETBP1	miR-149	ANKRD13D
m6A-circSETBP1	miR-149	EFEMP2
m6A-circSETBP1	miR-149	ENSSSCG00000013042
m6A-circSETBP1	miR-149	PRPF19
m6A-circSETBP1	miR-149	LRP4
m6A-circSETBP1	miR-149	PEAK3
m6A-circSETBP1	miR-149	DENND1C
m6A-circSETBP1	miR-149	XAB2
m6A-circSETBP1	miR-149	ANGPTL4
m6A-circSETBP1	miR-149	SLC44A2
m6A-circSETBP1	miR-149	PTGER1
m6A-circSETBP1	miR-149	CILP2
m6A-circSETBP1	miR-149	THOC3
m6A-circSETBP1	miR-149	PRDM6
m6A-circSETBP1	miR-149	SEPTIN8
m6A-circSETBP1	miR-149	FCHSD1
m6A-circSETBP1	miR-149	AFAP1L1
m6A-circSETBP1	miR-149	TCOF1
m6A-circSETBP1	miR-149	C2CD2L
m6A-circSETBP1	miR-149	MFRP
m6A-circSETBP1	miR-149	NECTIN1
m6A-circSETBP1	miR-149	NFRKB
m6A-circSETBP1	miR-149	CAMK1G
m6A-circSETBP1	miR-149	FBXO36
m6A-circSETBP1	miR-149	EPHA1
m6A-circSETBP1	miR-149	CLCN1
m6A-circSETBP1	miR-149	EPHB6
m6A-circSETBP1	miR-149	ENSSSCG00000016475
m6A-circSETBP1	miR-149	TSPAN33
m6A-circSETBP1	miR-149	AEBP1
m6A-circSETBP1	miR-149	POLM
m6A-circSETBP1	miR-149	BNIP1
m6A-circSETBP1	miR-149	ENSSSCG00000014368
m6A-circSETBP1	miR-149	TMEM184B
m6A-circSETBP1	miR-149	FGF22
m6A-circSETBP1	miR-149	WDR37
m6A-circSETBP1	miR-149	JOSD1
m6A-circSETBP1	miR-149	ENSSSCG00000012886
m6A-circSETBP1	miR-149	OSGIN1
m6A-circSETBP1	miR-149	PSRC1
m6A-circSETBP1	miR-149	BAHD1
m6A-circSETBP1	miR-149	MCHR1
m6A-circSETBP1	miR-149	GCAT
m6A-circSETBP1	miR-149	CSF2RB
m6A-circSETBP1	miR-149	AQP5
m6A-circSETBP1	miR-149	ACVR1B
m6A-circSETBP1	miR-149	P3H3
m6A-circSETBP1	miR-149	TNFRSF1A
m6A-circSETBP1	miR-149	ENSSSCG00000001427
m6A-circSETBP1	miR-149	TCP11
m6A-circSETBP1	miR-149	SRF
m6A-circSETBP1	miR-149	NFKBIE
m6A-circSETBP1	miR-149	SLC25A27
m6A-circSETBP1	miR-149	WDR61
m6A-circSETBP1	miR-149	SH2D7
m6A-circSETBP1	miR-149	CSPG4
m6A-circSETBP1	miR-149	STOML1
m6A-circSETBP1	miR-149	RABGGTA
m6A-circSETBP1	miR-149	DHRS4
m6A-circSETBP1	miR-149	CDH24
m6A-circSETBP1	miR-149	RGMA
m6A-circSETBP1	miR-149	GPX2
m6A-circSETBP1	miR-149	ASB2
m6A-circSETBP1	miR-149	DHX38
m6A-circSETBP1	miR-149	ADGRG3
m6A-circSETBP1	miR-149	SLC7A10
m6A-circSETBP1	miR-149	KCNN4
m6A-circSETBP1	miR-149	ENSSSCG00000003090
m6A-circSETBP1	miR-149	ENSSSCG00000003227
m6A-circSETBP1	miR-149	ATAD3A
m6A-circSETBP1	miR-149	FAM167B
m6A-circSETBP1	miR-149	WLS
m6A-circSETBP1	miR-149	BEST4
m6A-circSETBP1	miR-149	CORO2B
m6A-circSETBP1	miR-149	TRAF1
m6A-circSETBP1	miR-149	SLC2A8
m6A-circSETBP1	miR-149	ENSSSCG00000005649
m6A-circSETBP1	miR-149	LRRC8A
m6A-circSETBP1	miR-149	ASS1
m6A-circSETBP1	miR-149	FIBCD1
m6A-circSETBP1	miR-149	FAM83A
m6A-circSETBP1	miR-149	EXT1
m6A-circSETBP1	miR-149	NAXE
m6A-circSETBP1	miR-149	THBS3
m6A-circSETBP1	miR-149	CRTC2
m6A-circSETBP1	miR-149	NUDT17
m6A-circSETBP1	miR-149	POLR3C
m6A-circSETBP1	miR-149	BARHL2
m6A-circSETBP1	miR-149	BPIFB1
m6A-circSETBP1	miR-149	PIGU
m6A-circSETBP1	miR-149	NPEPL1
m6A-circSETBP1	miR-149	CYP2W1
m6A-circSETBP1	miR-149	BCKDK
m6A-circSETBP1	miR-149	PRSS53
m6A-circSETBP1	miR-149	CORO7
m6A-circSETBP1	miR-149	MAPK8IP3
m6A-circSETBP1	miR-149	GFER
m6A-circSETBP1	miR-149	SLC9A3R2
m6A-circSETBP1	miR-149	PKD1
m6A-circSETBP1	miR-149	RNPS1
m6A-circSETBP1	miR-212	EXD2
m6A-circSETBP1	miR-212	KIF26A
m6A-circSETBP1	miR-212	GSG1L
m6A-circSETBP1	miR-212	TMTC3
m6A-circSETBP1	miR-212	FLII
m6A-circSETBP1	miR-212	LDLRAD3
m6A-circSETBP1	miR-212	FBXO6
m6A-circSETBP1	miR-212	KDM1A
m6A-circSETBP1	miR-212	GRK6
m6A-circSETBP1	miR-212	MAPKBP1
m6A-circSETBP1	miR-212	ENSSSCG00000023569
m6A-circSETBP1	miR-212	ST3GAL4
m6A-circSETBP1	miR-212	PDCD11
m6A-circSETBP1	miR-212	OGDH
m6A-circSETBP1	miR-212	PRPF6
m6A-circSETBP1	miR-212	DLG4
m6A-circSETBP1	miR-212	CEP85
m6A-circSETBP1	miR-212	KCNAB3
m6A-circSETBP1	miR-212	KIRREL3
m6A-circSETBP1	miR-212	DICER1
m6A-circSETBP1	miR-212	FOXJ2
m6A-circSETBP1	miR-212	HCK
m6A-circSETBP1	miR-212	SSBP4
m6A-circSETBP1	miR-212	SIRT2
m6A-circSETBP1	miR-212	CCND1
m6A-circSETBP1	miR-212	MDK
m6A-circSETBP1	miR-212	NDRG4
m6A-circSETBP1	miR-212	SLC27A5
m6A-circSETBP1	miR-212	SNAI2
m6A-circSETBP1	miR-212	CD74
m6A-circSETBP1	miR-212	LRPAP1
m6A-circSETBP1	miR-212	ENSSSCG00000060564
m6A-circSETBP1	miR-212	RRP7A
m6A-circSETBP1	miR-212	TPI1
m6A-circSETBP1	miR-212	ENSSSCG00000032098
m6A-circSETBP1	miR-212	ARMH1
m6A-circSETBP1	miR-212	NGEF
m6A-circSETBP1	miR-212	OSBPL5
m6A-circSETBP1	miR-212	ITIH3
m6A-circSETBP1	miR-212	BEND5
m6A-circSETBP1	miR-212	UNC13D
m6A-circSETBP1	miR-212	NEUROD2
m6A-circSETBP1	miR-212	WNT7B
m6A-circSETBP1	miR-212	CCDC22
m6A-circSETBP1	miR-212	FOXP3
m6A-circSETBP1	miR-212	ENSSSCG00000005311
m6A-circSETBP1	miR-212	SMG9
m6A-circSETBP1	miR-212	CPZ
m6A-circSETBP1	miR-212	RAB25
m6A-circSETBP1	miR-212	MINDY1
m6A-circSETBP1	miR-212	BCKDHA
m6A-circSETBP1	miR-212	MRC2
m6A-circSETBP1	miR-212	BCL6B
m6A-circSETBP1	miR-212	EIF4A1
m6A-circSETBP1	miR-212	TRPV2
m6A-circSETBP1	miR-212	DMRTA2
m6A-circSETBP1	miR-212	PITHD1
m6A-circSETBP1	miR-212	CATSPER4
m6A-circSETBP1	miR-212	FSCN1
m6A-circSETBP1	miR-212	NT5C
m6A-circSETBP1	miR-212	YLPM1
m6A-circSETBP1	miR-212	TIMM17B
m6A-circSETBP1	miR-212	GCNT4
m6A-circSETBP1	miR-212	ZMIZ2
m6A-circSETBP1	miR-212	ENSSSCG00000027428
m6A-circSETBP1	miR-212	ENSSSCG00000024676
m6A-circSETBP1	miR-212	XRRA1
m6A-circSETBP1	miR-212	PPP1R12C
m6A-circSETBP1	miR-212	NES
m6A-circSETBP1	miR-212	PLXNA1
m6A-circSETBP1	miR-212	CIT
m6A-circSETBP1	miR-212	COQ5
m6A-circSETBP1	miR-212	FAM222A
m6A-circSETBP1	miR-212	HSD17B3
m6A-circSETBP1	miR-212	EXOG
m6A-circSETBP1	miR-212	BAP1
m6A-circSETBP1	miR-212	C19orf53
m6A-circSETBP1	miR-212	WDR55
m6A-circSETBP1	miR-212	STRA8
m6A-circSETBP1	miR-212	CHCHD3
m6A-circSETBP1	miR-212	KIF12
m6A-circSETBP1	miR-212	ZDHHC8
m6A-circSETBP1	miR-212	FGF22
m6A-circSETBP1	miR-212	ENSSSCG00000031706
m6A-circSETBP1	miR-212	GABARAPL1
m6A-circSETBP1	miR-212	ZBTB12
m6A-circSETBP1	miR-212	ODF3L1
m6A-circSETBP1	miR-212	RABGGTA
m6A-circSETBP1	miR-212	RGMA
m6A-circSETBP1	miR-212	TUBB3
m6A-circSETBP1	miR-212	APRT
m6A-circSETBP1	miR-212	OIP5
m6A-circSETBP1	miR-212	FAM214B
m6A-circSETBP1	miR-212	CFAP77
m6A-circSETBP1	miR-212	NXT1
m6A-circSETBP1	miR-212	FAM110A
m6A-circSETBP1	miR-212	MYBL2
m6A-circSETBP1	miR-212	PKD1
m6A-circSETBP1	miR-22-5p	HAUS4
m6A-circSETBP1	miR-22-5p	TNNI1
m6A-circSETBP1	miR-22-5p	SQOR
m6A-circSETBP1	miR-22-5p	HECW1
m6A-circSETBP1	miR-22-5p	DCTN1
m6A-circSETBP1	miR-22-5p	LARGE1
m6A-circSETBP1	miR-22-5p	NBN
m6A-circSETBP1	miR-22-5p	FUNDC1
m6A-circSETBP1	miR-22-5p	AMIGO3
m6A-circSETBP1	miR-22-5p	GMPPB
m6A-circSETBP1	miR-31	ENSSSCG00000004001
m6A-circSETBP1	miR-31	NUP188
m6A-circSETBP1	miR-31	FATE1
m6A-circSETBP1	miR-31	KLK6
m6A-circSETBP1	miR-31	ALG5
m6A-circSETBP1	miR-31	VEGFA
m6A-circSETBP1	miR-31	ENSSSCG00000013665
m6A-circSETBP1	miR-31	TMED1
m6A-circSETBP1	miR-31	GGA3
m6A-circSETBP1	miR-31	NR5A2
m6A-circSETBP1	miR-31	ALDOC
m6A-circSETBP1	miR-31	DRD2
m6A-circSETBP1	miR-31	FANCD2
m6A-circSETBP1	miR-31	TTC7B
m6A-circSETBP1	miR-31	STRADA
m6A-circSETBP1	miR-31	CPE
m6A-circSETBP1	miR-31	RP9
m6A-circSETBP1	miR-31	RARG
m6A-circSETBP1	miR-31	KLC4
m6A-circSETBP1	miR-31	TMEM179B
m6A-circSETBP1	miR-31	VWA7
m6A-circSETBP1	miR-31	ENSSSCG00000034866
m6A-circSETBP1	miR-31	CTNNBIP1
m6A-circSETBP1	miR-31	CNP
m6A-circSETBP1	miR-31	GPR137
m6A-circSETBP1	miR-31	ENSSSCG00000015814
m6A-circSETBP1	miR-31	ASXL1
m6A-circSETBP1	miR-31	SAE1
m6A-circSETBP1	miR-31	PDGFB
m6A-circSETBP1	miR-31	TTLL9
m6A-circSETBP1	miR-31	ZNF655
m6A-circSETBP1	miR-31	VAPB
m6A-circSETBP1	miR-31	AP3B1
m6A-circSETBP1	miR-31	DHRS1
m6A-circSETBP1	miR-31	ETV7
m6A-circSETBP1	miR-31	DENND5A
m6A-circSETBP1	miR-31	KANK1
m6A-circSETBP1	miR-31	FAM3A
m6A-circSETBP1	miR-31	UBAP2L
m6A-circSETBP1	miR-31	ELAVL1
m6A-circSETBP1	miR-31	SOX8
m6A-circSETBP1	miR-31	SEPTIN5
m6A-circSETBP1	miR-31	YTHDF1
m6A-circSETBP1	miR-31	IST1
m6A-circSETBP1	miR-31	BET1L
m6A-circSETBP1	miR-31	CCDC9
m6A-circSETBP1	miR-31	SCN1B
m6A-circSETBP1	miR-31	MIF4GD
m6A-circSETBP1	miR-31	TTC4
m6A-circSETBP1	miR-31	CCDC47
m6A-circSETBP1	miR-31	EFNA4
m6A-circSETBP1	miR-31	DKC1
m6A-circSETBP1	miR-31	CACNA2D2
m6A-circSETBP1	miR-31	FOXP3
m6A-circSETBP1	miR-31	SEMA4D
m6A-circSETBP1	miR-31	VBP1
m6A-circSETBP1	miR-31	VWF
m6A-circSETBP1	miR-31	SQSTM1
m6A-circSETBP1	miR-31	CPZ
m6A-circSETBP1	miR-31	GKN3
m6A-circSETBP1	miR-31	ENSSSCG00000032591
m6A-circSETBP1	miR-31	RNASEK
m6A-circSETBP1	miR-31	ALKBH4
m6A-circSETBP1	miR-31	ENSSSCG00000025500
m6A-circSETBP1	miR-31	ENSSSCG00000029596
m6A-circSETBP1	miR-31	FMNL3
m6A-circSETBP1	miR-31	FSHR
m6A-circSETBP1	miR-31	FMNL1
m6A-circSETBP1	miR-31	FHIP1A
m6A-circSETBP1	miR-31	ENSSSCG00000028341
m6A-circSETBP1	miR-31	SLC12A9
m6A-circSETBP1	miR-31	MON1A
m6A-circSETBP1	miR-31	HGH1
m6A-circSETBP1	miR-31	GGA1
m6A-circSETBP1	miR-31	ZGPAT
m6A-circSETBP1	miR-31	PSD2
m6A-circSETBP1	miR-31	FNDC4
m6A-circSETBP1	miR-31	CUL4A
m6A-circSETBP1	miR-31	KLHL22
m6A-circSETBP1	miR-31	DCLRE1A
m6A-circSETBP1	miR-31	P4HTM
m6A-circSETBP1	miR-31	TATDN2
m6A-circSETBP1	miR-31	APP
m6A-circSETBP1	miR-31	ENSSSCG00000012842
m6A-circSETBP1	miR-31	ENSSSCG00000013530
m6A-circSETBP1	miR-31	XAB2
m6A-circSETBP1	miR-31	ENSSSCG00000013607
m6A-circSETBP1	miR-31	COL5A3
m6A-circSETBP1	miR-31	PTGER1
m6A-circSETBP1	miR-31	LMAN2
m6A-circSETBP1	miR-31	CHRDL2
m6A-circSETBP1	miR-31	ELAPOR2
m6A-circSETBP1	miR-31	TOR3A
m6A-circSETBP1	miR-31	PTPN3
m6A-circSETBP1	miR-31	CSNK1E
m6A-circSETBP1	miR-31	SLA-DQB1
m6A-circSETBP1	miR-31	XRCC3
m6A-circSETBP1	miR-31	TESK2
m6A-circSETBP1	miR-31	SMPDL3A
m6A-circSETBP1	miR-31	SMPD2
m6A-circSETBP1	miR-31	FAM135B
m6A-circSETBP1	miR-31	KHDRBS3
m6A-circSETBP1	miR-31	PEX2
m6A-circSETBP1	miR-31	CPXM1
m6A-circSETBP1	miR-33b-5p	SALL2
m6A-circSETBP1	miR-33b-5p	DDX5
m6A-circSETBP1	miR-33b-5p	SCAP
m6A-circSETBP1	miR-33b-5p	UBAP2L
m6A-circSETBP1	miR-33b-5p	CAMK2G
m6A-circSETBP1	miR-33b-5p	CROT
m6A-circSETBP1	miR-6529	PRKAG1
m6A-circSETBP1	miR-6529	ZNF638
m6A-circSETBP1	miR-6529	STIM1
m6A-circSETBP1	miR-6529	DOCK6
m6A-circSETBP1	miR-6529	ENSSSCG00000032149
m6A-circSETBP1	miR-6529	ENSSSCG00000015083
m6A-circSETBP1	miR-6529	TRMT11
m6A-circSETBP1	miR-6529	DSG2
m6A-circSETBP1	miR-6529	C12orf50
m6A-circSETBP1	miR-6529	PIM3
m6A-circSETBP1	miR-6529	PRDX6
m6A-circSETBP1	miR-6529	HERC3
m6A-circSETBP1	miR-6529	SLAMF1
m6A-circSETBP1	miR-6529	ASCC1
m6A-circSETBP1	miR-6529	LRRC14B
m6A-circSETBP1	miR-6529	ENSSSCG00000022773
m6A-circSETBP1	miR-6529	PRDX1
m6A-circSETBP1	miR-6529	ZBTB7C
m6A-circSETBP1	miR-6529	ABHD12
m6A-circSETBP1	miR-6529	NCCRP1
m6A-circSETBP1	miR-6529	TEX261
m6A-circSETBP1	miR-6529	PCNX3
m6A-circSETBP1	miR-6529	COPZ1
m6A-circSETBP1	miR-6529	WASHC4
m6A-circSETBP1	miR-6529	EGFL8
m6A-circSETBP1	miR-6529	SLA-DMA
m6A-circSETBP1	miR-6529	COMMD4
m6A-circSETBP1	miR-6529	ENSSSCG00000003302
m6A-circSETBP1	miR-6529	TUBGCP4
m6A-circSETBP1	miR-6529	CERCAM
m6A-circSETBP1	miR-6529	DEFB115
m6A-circSETBP1	miR-7136-5p	KAT5
m6A-circSETBP1	miR-7136-5p	CTNNA1
m6A-circSETBP1	miR-7136-5p	DNM2
m6A-circSETBP1	miR-7136-5p	VPREB3
m6A-circSETBP1	miR-7136-5p	ENSSSCG00000006324
m6A-circSETBP1	miR-7136-5p	ABCF2
m6A-circSETBP1	miR-7136-5p	PVALEF
m6A-circSETBP1	miR-7136-5p	GNE
m6A-circSETBP1	miR-7136-5p	GGA3
m6A-circSETBP1	miR-7136-5p	ILKAP
m6A-circSETBP1	miR-7136-5p	SPEGNB
m6A-circSETBP1	miR-7136-5p	ENSSSCG00000032337
m6A-circSETBP1	miR-7136-5p	MAP4K2
m6A-circSETBP1	miR-7136-5p	ENSSSCG00000062489
m6A-circSETBP1	miR-7136-5p	ZNF346
m6A-circSETBP1	miR-7136-5p	ENSSSCG00000040986
m6A-circSETBP1	miR-7136-5p	SUGP2
m6A-circSETBP1	miR-7136-5p	NUCB1
m6A-circSETBP1	miR-7136-5p	RTP1
m6A-circSETBP1	miR-7136-5p	ENSSSCG00000027890
m6A-circSETBP1	miR-7136-5p	ENSSSCG00000053814
m6A-circSETBP1	miR-7136-5p	ENSSSCG00000017448
m6A-circSETBP1	miR-7136-5p	BCAR1
m6A-circSETBP1	miR-7136-5p	HAAO
m6A-circSETBP1	miR-7136-5p	CCDC134
m6A-circSETBP1	miR-7136-5p	KIFC3
m6A-circSETBP1	miR-7136-5p	SLC9A3
m6A-circSETBP1	miR-7136-5p	WLS
m6A-circSETBP1	miR-7136-5p	PTK2B
m6A-circSETBP1	miR-7136-5p	PLPP2
m6A-circSETBP1	miR-7136-5p	ANKS3
m6A-circSETBP1	miR-7136-5p	ENSSSCG00000039961
m6A-circSETBP1	miR-7136-5p	FAM234A
m6A-circSETBP1	miR-7136-5p	PIM3
m6A-circSETBP1	miR-7136-5p	FAAP100
m6A-circSETBP1	miR-7136-5p	KLHDC3
m6A-circSETBP1	miR-7136-5p	EIF3L
m6A-circSETBP1	miR-7136-5p	SLC27A5
m6A-circSETBP1	miR-7136-5p	ATG4B
m6A-circSETBP1	miR-7136-5p	GJA4
m6A-circSETBP1	miR-7136-5p	PEF1
m6A-circSETBP1	miR-7136-5p	SLC5A6
m6A-circSETBP1	miR-7136-5p	PGBD5
m6A-circSETBP1	miR-7136-5p	DNASE1
m6A-circSETBP1	miR-7136-5p	ADORA2B
m6A-circSETBP1	miR-7136-5p	CNN1
m6A-circSETBP1	miR-7136-5p	CHD5
m6A-circSETBP1	miR-7136-5p	DLGAP3
m6A-circSETBP1	miR-7136-5p	MMP28
m6A-circSETBP1	miR-7136-5p	HK3
m6A-circSETBP1	miR-7136-5p	BGN
m6A-circSETBP1	miR-7136-5p	GPKOW
m6A-circSETBP1	miR-7136-5p	RAG1
m6A-circSETBP1	miR-7136-5p	FAF1
m6A-circSETBP1	miR-7136-5p	PLA2G6
m6A-circSETBP1	miR-7136-5p	GABRD
m6A-circSETBP1	miR-7136-5p	UAP1
m6A-circSETBP1	miR-7136-5p	LY86
m6A-circSETBP1	miR-7136-5p	DNAI1
m6A-circSETBP1	miR-7136-5p	ENSSSCG00000007719
m6A-circSETBP1	miR-7136-5p	TNNI1
m6A-circSETBP1	miR-7136-5p	PRMT8
m6A-circSETBP1	miR-7136-5p	NUP214
m6A-circSETBP1	miR-7136-5p	CERS4
m6A-circSETBP1	miR-7136-5p	ENSSSCG00000037038
m6A-circSETBP1	miR-7136-5p	SGSH
m6A-circSETBP1	miR-7136-5p	FOXJ1
m6A-circSETBP1	miR-7136-5p	ADAM11
m6A-circSETBP1	miR-7136-5p	KRT19
m6A-circSETBP1	miR-7136-5p	CDC6
m6A-circSETBP1	miR-7136-5p	NXPH3
m6A-circSETBP1	miR-7136-5p	ERAL1
m6A-circSETBP1	miR-7136-5p	ENSSSCG00000017942
m6A-circSETBP1	miR-7136-5p	RABGAP1
m6A-circSETBP1	miR-7136-5p	HCFC1R1
m6A-circSETBP1	miR-7136-5p	ENSSSCG00000028786
m6A-circSETBP1	miR-7136-5p	ENSSSCG00000020777
m6A-circSETBP1	miR-7136-5p	INTS1
m6A-circSETBP1	miR-7136-5p	TKT
m6A-circSETBP1	miR-7136-5p	PDE9A
m6A-circSETBP1	miR-7136-5p	TRRAP
m6A-circSETBP1	miR-7136-5p	THYN1
m6A-circSETBP1	miR-7136-5p	ENSSSCG00000028341
m6A-circSETBP1	miR-7136-5p	FAM163B
m6A-circSETBP1	miR-7136-5p	AP2S1
m6A-circSETBP1	miR-7136-5p	MFSD12
m6A-circSETBP1	miR-7136-5p	ABCA3
m6A-circSETBP1	miR-7136-5p	CUL9
m6A-circSETBP1	miR-7136-5p	B4GALT2
m6A-circSETBP1	miR-7136-5p	PCGF3
m6A-circSETBP1	miR-7136-5p	MCM3
m6A-circSETBP1	miR-7136-5p	RANGAP1
m6A-circSETBP1	miR-7136-5p	ATOH8
m6A-circSETBP1	miR-7136-5p	ACOX3
m6A-circSETBP1	miR-7136-5p	NUDT18
m6A-circSETBP1	miR-7136-5p	MMP11
m6A-circSETBP1	miR-7136-5p	KCNK1
m6A-circSETBP1	miR-7136-5p	PITRM1
m6A-circSETBP1	miR-7136-5p	NEK11
m6A-circSETBP1	miR-7136-5p	CISH
m6A-circSETBP1	miR-7136-5p	BAP1
m6A-circSETBP1	miR-7136-5p	TAMM41
m6A-circSETBP1	miR-7136-5p	SLC37A1
m6A-circSETBP1	miR-7136-5p	CEND1
m6A-circSETBP1	miR-7136-5p	ABTB2
m6A-circSETBP1	miR-7136-5p	FZR1
m6A-circSETBP1	miR-7136-5p	ENSSSCG00000014554
m6A-circSETBP1	miR-7136-5p	PCSK7
m6A-circSETBP1	miR-7136-5p	ADAMTS15
m6A-circSETBP1	miR-7136-5p	GSR
m6A-circSETBP1	miR-7136-5p	GBX2
m6A-circSETBP1	miR-7136-5p	COPB2
m6A-circSETBP1	miR-7136-5p	ENSSSCG00000031706
m6A-circSETBP1	miR-7136-5p	FAIM2
m6A-circSETBP1	miR-7136-5p	VWF
m6A-circSETBP1	miR-7136-5p	CCDC77
m6A-circSETBP1	miR-7136-5p	PSMB8
m6A-circSETBP1	miR-7136-5p	FRS3
m6A-circSETBP1	miR-7136-5p	FAH
m6A-circSETBP1	miR-7136-5p	STARD5
m6A-circSETBP1	miR-7136-5p	N4BP1
m6A-circSETBP1	miR-7136-5p	JOSD2
m6A-circSETBP1	miR-7136-5p	CHD4
m6A-circSETBP1	miR-7136-5p	DISP3
m6A-circSETBP1	miR-7136-5p	ADPRS
m6A-circSETBP1	miR-7136-5p	ENSSSCG00000003998
m6A-circSETBP1	miR-7136-5p	DPPA5
m6A-circSETBP1	miR-7136-5p	COX7A2
m6A-circSETBP1	miR-7136-5p	CCDC9B
m6A-circSETBP1	miR-7136-5p	SEC11C
m6A-circSETBP1	miR-7136-5p	CLN6
m6A-circSETBP1	miR-7136-5p	SLC27A4
m6A-circSETBP1	miR-7136-5p	ASS1
m6A-circSETBP1	miR-7136-5p	CFAP77
m6A-circSETBP1	miR-7136-5p	ENTPD8
m6A-circSETBP1	miR-7136-5p	VANGL2
m6A-circSETBP1	miR-7136-5p	NPR1
m6A-circSETBP1	miR-7136-5p	IDH3B
m6A-circSETBP1	miR-7136-5p	MATN4
m6A-circSETBP1	miR-7136-5p	SYNGR3
m6A-circSETBP1	miR-7136-5p	EDAR
